# Supplementary material for: 1,3,4-Oxadiazole N-Mannich Bases: Synthesis, Antimicrobial, and Anti-Proliferative Activities
Source: PubMed Central journal article supplement (PMC8067589; doi:10.3390/molecules26082110), 2021-04-07
Supplement: molecules-26-02110-s001.pdf [file molecules-26-02110-s001.pdf]

## Supplementary Materials

# 1,3,4-Oxadiazole N-Mannich Bases: Synthesis, Antimicrobial, and Anti-Proliferative Activities

**Table S1.** Molecular formulae, molecular weights and elemental analyses data of compounds **4a-l** and **5a-d**.

| Comp. No. | Mol. Formula (Mol. Wt.)                                                                  | Analysis: % Calcd. (Found) |             |               |             |
|-----------|------------------------------------------------------------------------------------------|----------------------------|-------------|---------------|-------------|
|           |                                                                                          | C                          | H           | N             | S           |
| <b>4a</b> | C <sub>17</sub> H <sub>17</sub> N <sub>3</sub> O <sub>3</sub> S (343.40)                 | 59.46 (59.23)              | 4.99 (5.02) | 12.24 (12.13) | 9.34 (9.33) |
| <b>4b</b> | C <sub>17</sub> H <sub>16</sub> FN <sub>3</sub> O <sub>3</sub> S (361.39)                | 56.50 (56.44)              | 4.46 (4.52) | 11.63 (11.60) | 8.87 (8.85) |
| <b>4c</b> | C <sub>17</sub> H <sub>16</sub> ClN <sub>3</sub> O <sub>3</sub> S (377.85)               | 54.04 (53.88)              | 4.27 (4.29) | 11.12 (11.02) | 8.49 (8.50) |
| <b>4d</b> | C <sub>17</sub> H <sub>16</sub> ClN <sub>3</sub> O <sub>3</sub> S (377.85)               | 54.04 (54.0)               | 4.27 (4.32) | 11.12 (11.04) | 8.49 (8.47) |
| <b>4e</b> | C <sub>17</sub> H <sub>16</sub> N <sub>4</sub> O <sub>3</sub> S (388.40)                 | 52.57 (52.44)              | 4.15 (4.22) | 14.43 (14.41) | 8.26 (8.12) |
| <b>4f</b> | C <sub>17</sub> H <sub>16</sub> N <sub>4</sub> O <sub>3</sub> S (388.40)                 | 52.57 (52.50)              | 4.15 (4.18) | 14.43 (14.43) | 8.26 (8.25) |
| <b>4g</b> | C <sub>17</sub> H <sub>16</sub> N <sub>4</sub> O <sub>3</sub> S (388.40)                 | 52.57 (52.52)              | 4.15 (4.23) | 14.43 (14.25) | 8.26 (8.22) |
| <b>4h</b> | C <sub>18</sub> H <sub>16</sub> F <sub>3</sub> N <sub>3</sub> O <sub>3</sub> S (411.40)  | 52.55 (52.32)              | 3.92 (4.02) | 10.21 (10.22) | 7.79 (7.60) |
| <b>4i</b> | C <sub>18</sub> H <sub>16</sub> F <sub>3</sub> N <sub>3</sub> O <sub>3</sub> S (411.40)  | 52.55 (52.48)              | 3.92 (3.94) | 10.21 (10.15) | 7.79 (7.72) |
| <b>4j</b> | C <sub>17</sub> H <sub>15</sub> F <sub>2</sub> N <sub>3</sub> O <sub>3</sub> S (379.38)  | 53.82 (53.72)              | 3.99 (4.04) | 11.08 (11.01) | 8.45 (8.44) |
| <b>4k</b> | C <sub>17</sub> H <sub>15</sub> F <sub>2</sub> N <sub>3</sub> O <sub>3</sub> S (379.38)  | 53.82 (53.66)              | 3.99 (4.12) | 11.08 (10.88) | 8.45 (8.45) |
| <b>4l</b> | C <sub>17</sub> H <sub>15</sub> Cl <sub>2</sub> N <sub>3</sub> O <sub>3</sub> S (412.29) | 49.52 (49.34)              | 3.67 (3.75) | 10.19 (10.20) | 7.78 (7.76) |
| <b>5a</b> | C <sub>21</sub> H <sub>24</sub> N <sub>4</sub> O <sub>3</sub> S (412.51)                 | 61.14 (61.14)              | 5.86 (5.92) | 13.58 (13.42) | 7.77 (7.68) |
| <b>5b</b> | C <sub>21</sub> H <sub>23</sub> FN <sub>4</sub> O <sub>3</sub> S (430.50)                | 58.59 (58.44)              | 6.96 (6.99) | 5.52 (5.38)   | 6.32 (6.30) |
| <b>5c</b> | C <sub>22</sub> H <sub>26</sub> N <sub>4</sub> O <sub>3</sub> S (426.53)                 | 61.95 (61.72)              | 6.14 (6.30) | 13.14 (13.0)  | 7.52 (7.48) |
| <b>5d</b> | C <sub>23</sub> H <sub>25</sub> F <sub>3</sub> N <sub>4</sub> O <sub>3</sub> S (494.53)  | 55.86 (55.64)              | 5.10 (5.18) | 11.33 (11.24) | 6.48 (6.44) |

### Determination of *in vitro* antimicrobial activity (agar disc diffusion method) [1]

Sterile filter paper discs (8 mm diameter) were moistened with the compound solution in dimethyl sulfoxide of specific concentration (200 µg/disc), and the antibacterial drugs, Gentamicin sulphate and Ampicillin trihydrate (100 µg/disc) and the antifungal drug Clotrimazole (100 µg/disc), were carefully placed on agar culture plates that had been previously inoculated separately with the microorganisms. The plates were incubated at 37 °C, and the diameters of the growth inhibition zones were measured after 24 hours for bacteria and 48 hours for *C. albicans*.

### **Determination of the minimal inhibitory concentration (MIC) [2]**

Compounds **4j**, **4l**, **5a**, **5b**, **5c**, **5d**, Gentamicin sulfate, Ampicillin trihydrate, and Clotrimazole were dissolved in dimethyl sulphoxide at a concentration of 128 µg/mL. The two-fold dilutions of the solution were prepared (128, 64, 32, ..., 0.25 µg/mL). Suspensions of the microorganisms at concentrations of 10<sup>6</sup> colony-forming units per mL were inoculated in the corresponding wells. The plates were then incubated at 36°C for 24 hours. The MIC values were determined as the lowest concentrations that completely inhibited visible growth of the microorganism as detected by the unaided eye.

### **Determination of *in vitro* anti-proliferative activity [3,4]**

The *in vitro* anti-proliferative activity screening of compounds **4a-1** and **5a-d** was measured against three human cancer cell lines namely; prostate cancer (PC3), human colorectal cancer (HCT-116), human hepatocellular carcinoma (HePG-2), human epithelioid carcinoma (HeLa) and human breast cancer (MCF7) cell lines using the standard MTT assay. PC3, HCT-116, HePG-2, HeLa and MCF7 cells (3000 cells per well) were cultured and seeded into 96-well plates and the plates were incubated for 24 hours. The cells were then treated with compounds **4a-1**, **5a-d** and Doxorubicin at different concentrations in DMSO (0.1 µM to 100 µM) at 37 °C in an atmosphere of 5% CO<sub>2</sub> for 48 hours. Freshly prepared MTT was added to each well at a terminal concentration of 5 µg/mL and incubated with cells at 37 °C for 4 hours. The formazan crystals were dissolved in 100 µL of DMSO in each well, and the absorbency at 492 nm (for absorbance of MTT formazan) and 630 nm (for the reference wavelength) was measured with an enzyme linked immunosorbent assay (ELISA) reader (ChroMate-4300, FL, USA). All compounds were tested three times in each of the cell lines. The IC<sub>50</sub> values were calculated according to the equation for Boltzmann sigmoidal concentration response curve using the nonlinear regression fitting models (Graph Pad, Prism Version 5). The results reported are means of



Filename = Prof.DR Ali Elemam\_DM\_6\_pr  
 Author = delta  
 Experiment = proton.jxp  
 Sample\_Id = Prof.DR Ali Elemam\_DM\_6  
 Solvent = DMSO-D6  
 Creation\_Time = 30-DEC-2020 11:26:27  
 Revision\_Time = 6-FEB-2021 01:02:33  
 Current\_Time = 6-FEB-2021 01:03:10

Comment = single\_pulse  
 Data\_Format = 1D\_COMPLEX  
 Dim\_Size = 13107  
 Dim\_Title = Proton  
 Dim\_Units = [ppm]  
 Dimensions = X  
 Site = JNM-ECA500II  
 Spectrometer = DELTA2\_NMR

Field\_Strength = 11.7473579[T] (500[MHz])  
 X\_Acq\_Duration = 1.24780544[s]  
 X\_Domain = 1H  
 X\_Freq = 500.15991521[MHz]  
 X\_Offset = 7.0[ppm]  
 X\_Points = 16384  
 X\_Prescans = 1  
 X\_Resolution = 0.80140699[Hz]  
 X\_Sweep = 13.1302521[kHz]  
 X\_Sweep\_Clippped = 10.50420168[kHz]  
 Irr\_Domain = Proton  
 Irr\_Freq = 500.15991521[MHz]  
 Irr\_Offset = 5.0[ppm]  
 Tri\_Domain = Proton  
 Tri\_Freq = 500.15991521[MHz]  
 Tri\_Offset = 5.0[ppm]  
 Clipped = FALSE  
 Scans = 40  
 Total\_Scans = 40

Relaxation\_Delay = 5[s]  
 Recvr\_Gain = 50  
 Temp\_Get = 18.4[dC]  
 X\_90\_Width = 16[us]  
 X\_Acq\_Time = 1.24780544[s]  
 X\_Angle = 45[deg]  
 X\_Atn = 2.5[dB]  
 X\_Pulse = 8[us]  
 Irr\_Mode = Off  
 Tri\_Mode = Off  
 Dante\_Presat = FALSE  
 Initial\_Wait = 1[s]  
 Repetition\_Time = 6.24780544[s]

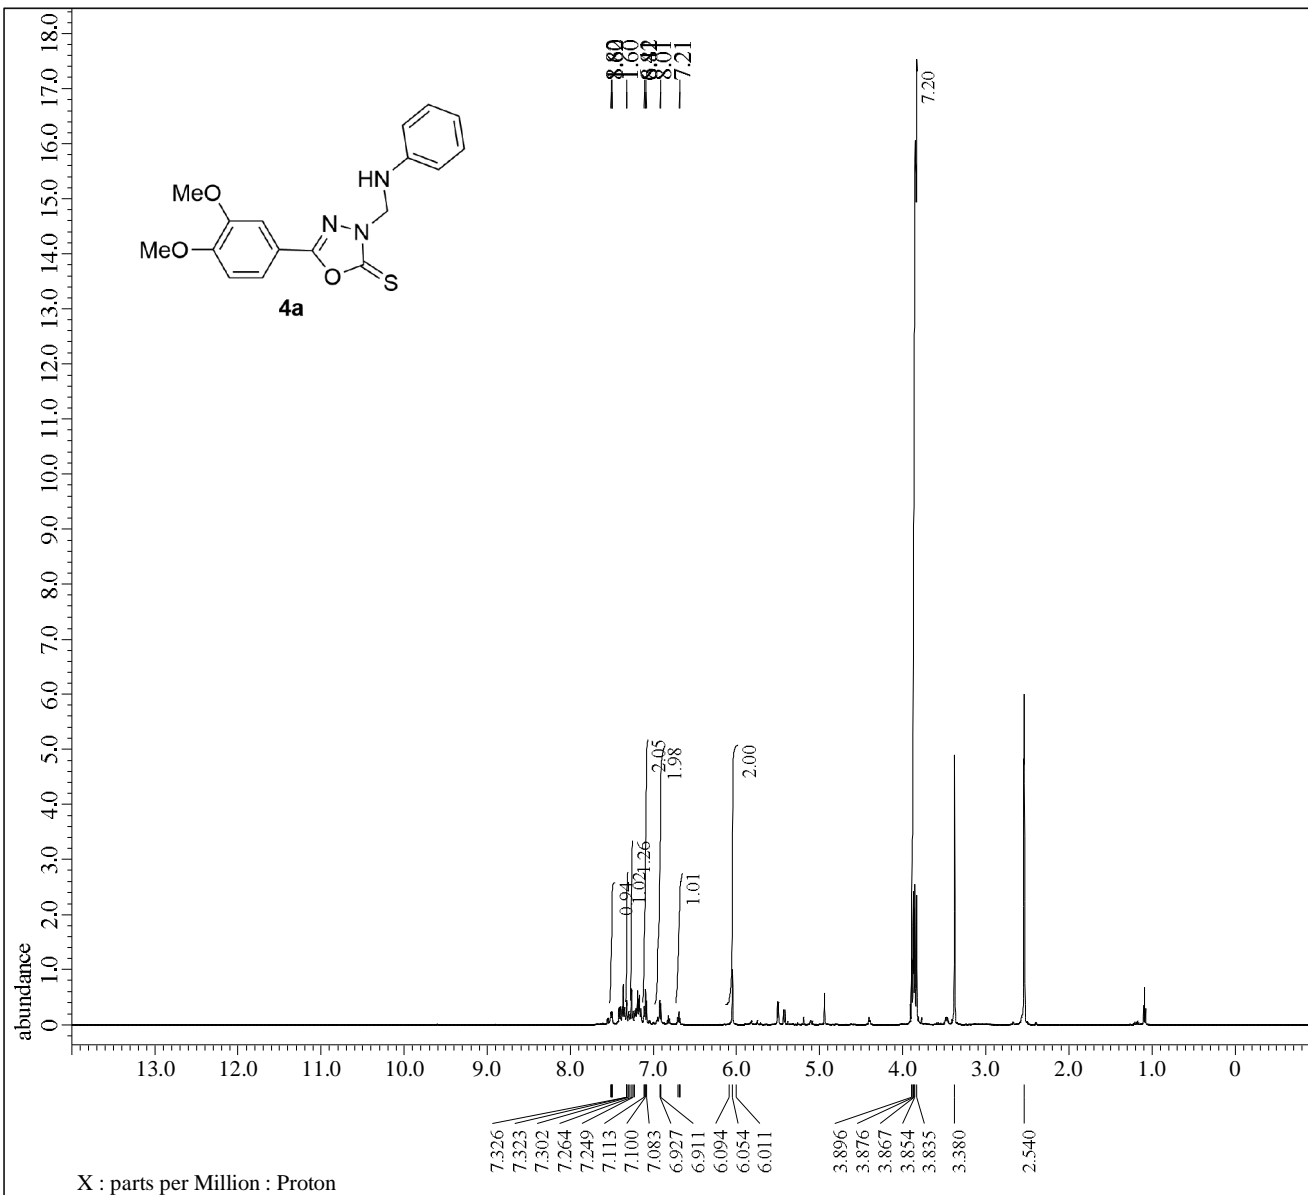

X : parts per Million : Proton

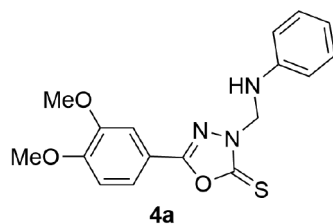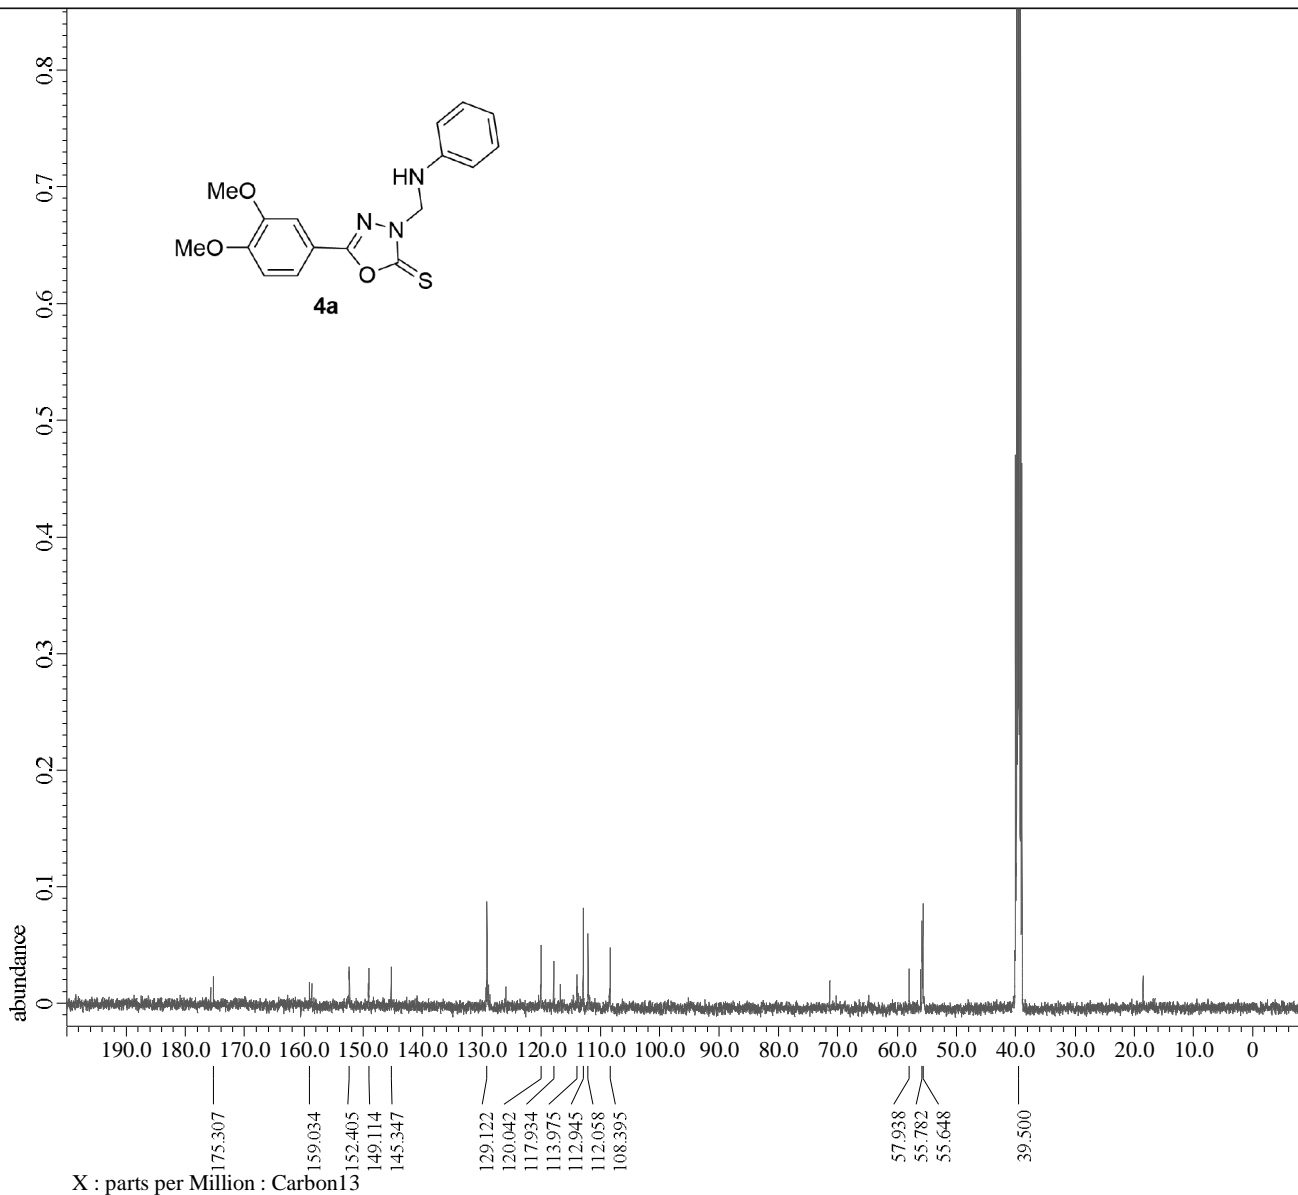

Filename = Prof.DR Ali Elemam\_DM\_6\_ca  
 Author = delta  
 Experiment = carbon.jxp  
 Sample\_Id = Prof.DR Ali Elemam\_DM\_6  
 Solvent = DMSO-D6  
 Creation\_Time = 25-JAN-2021 19:15:38  
 Revision\_Time = 5-FEB-2021 07:54:05  
 Current\_Time = 5-FEB-2021 07:54:24

Comment = single pulse decoupled gat  
 Data\_Format = 1D COMPLEX  
 Dim\_Size = 26214  
 Dim\_Title = Carbon13  
 Dim\_Units = [ppm]  
 Dimensions = X  
 Site = JNM-ECA500II  
 Spectrometer = DELTA2\_NMR

Field\_Strength = 11.7473579[T] (500[MHz])  
 X\_Acq\_Duration = 0.83361792[s]  
 X\_Domain = 13C  
 X\_Freq = 125.76529768[MHz]  
 X\_Offset = 100[ppm]  
 X\_Points = 32768  
 X\_Prescans = 4  
 X\_Resolution = 1.19959034[Hz]  
 X\_Sweep = 39.3081761[kHz]  
 X\_Sweep\_Clipped = 31.44654088[kHz]  
 Irr\_Domain = Proton  
 Irr\_Freq = 500.15991521[MHz]  
 Irr\_Offset = 5.0[ppm]  
 Clipped = FALSE  
 Scans = 1024  
 Total\_Scans = 1024

Relaxation\_Delay = 2[s]  
 Recvr\_Gain = 58  
 Temp\_Get = 19.9[dC]  
 X\_90\_Width = 32.3[us]  
 X\_Acq\_Time = 0.83361792[s]  
 X\_Angle = 30[deg]  
 X\_Atn = 10[dB]  
 X\_Pulse = 10.76666667[us]  
 Irr\_Atn\_Dec = 17.693[dB]  
 Irr\_Atn\_Noise = 17.693[dB]  
 Irr\_Noise = WALTZ  
 Irr\_Pwidth = 92[us]  
 Decoupling = TRUE  
 Initial\_Wait = 1[s]  
 Noe = TRUE  
 Noe\_Time = 2[s]  
 Repetition\_Time = 2.83361792[s]

Filename = Prof.DR Ali Elemam\_DM\_7\_pr  
 Author = delta  
 Experiment = proton.jxp  
 Sample\_Id = Prof.DR Ali Elemam\_DM\_7  
 Solvent = DMSO-D6  
 Creation\_Time = 30-DEC-2020 11:45:19  
 Revision\_Time = 6-FEB-2021 00:58:53  
 Current\_Time = 6-FEB-2021 00:59:14

Comment = single\_pulse  
 Data\_Format = 1D COMPLEX  
 Dim\_Size = 13107  
 Dim\_Title = Proton  
 Dim\_Units = [ppm]  
 Dimensions = X  
 Site = JNM-ECA500II  
 Spectrometer = DELTA2\_NMR

Field\_Strength = 11.7473579[T] (500[MHz])  
 X\_Acq\_Duration = 1.24780544[s]  
 X\_Domain = 1H  
 X\_Freq = 500.15991521[MHz]  
 X\_Offset = 7.0[ppm]  
 X\_Points = 16384  
 X\_Prescans = 1  
 X\_Resolution = 0.80140699[Hz]  
 X\_Sweep = 13.1302521[kHz]  
 X\_Sweep\_Clipped = 10.50420168[kHz]  
 Irr\_Domain = Proton  
 Irr\_Freq = 500.15991521[MHz]  
 Irr\_Offset = 5.0[ppm]  
 Tri\_Domain = Proton  
 Tri\_Freq = 500.15991521[MHz]  
 Tri\_Offset = 5.0[ppm]  
 Clipped = FALSE  
 Scans = 40  
 Total\_Scans = 40

Relaxation\_Delay = 5[s]  
 Recvr\_Gain = 50  
 Temp\_Get = 18.1[dC]  
 X\_90\_Width = 16[us]  
 X\_Acq\_Time = 1.24780544[s]  
 X\_Angle = 45[deg]  
 X\_Atn = 2.5[dB]  
 X\_Pulse = 8[us]  
 Irr\_Mode = Off  
 Tri\_Mode = Off  
 Dante\_Preset = FALSE  
 Initial\_Wait = 1[s]  
 Repetition\_Time = 6.24780544[s]

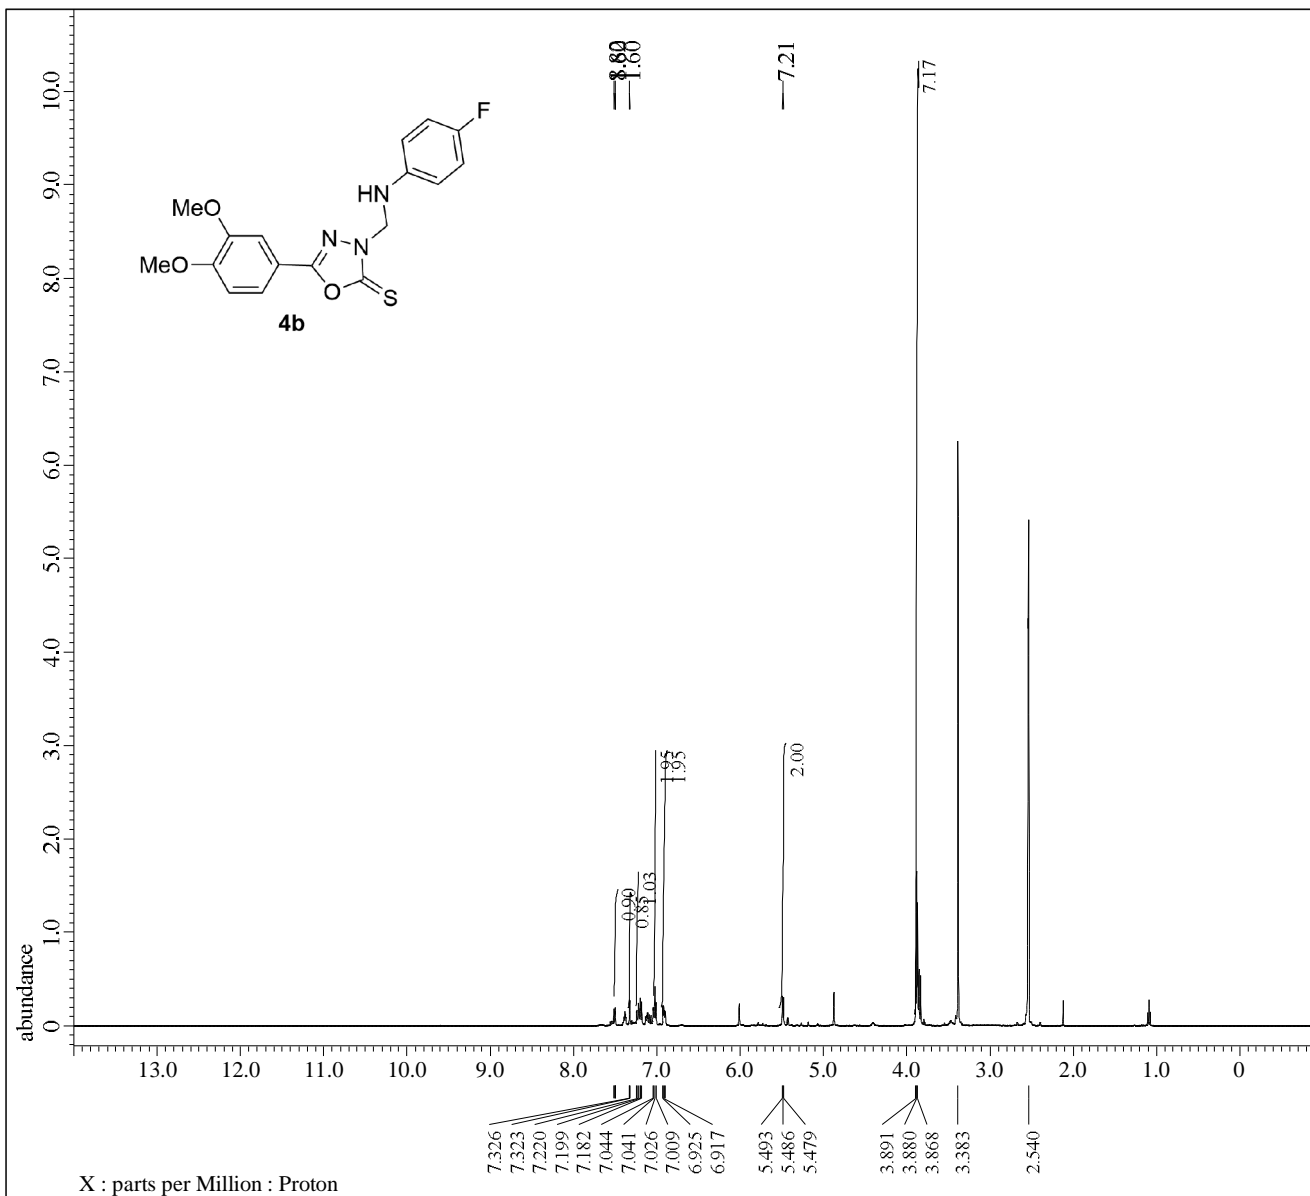

Filename = Prof.DR Ali Elemam\_DM\_7\_ca  
 Author = delta  
 Experiment = carbon.jxp  
 Sample\_Id = Prof.DR Ali Elemam\_DM\_7  
 Solvent = DMSO-D6  
 Creation\_Time = 25-JAN-2021 20:12:49  
 Revision\_Time = 5-FEB-2021 08:13:23  
 Current\_Time = 5-FEB-2021 08:13:58

Comment = single pulse decoupled gat  
 Data\_Format = 1D COMPLEX  
 Dim\_Size = 26214  
 Dim\_Title = Carbon13  
 Dim\_Units = [ppm]  
 Dimensions = X  
 Site = JNM-ECA500II  
 Spectrometer = DELTA2\_NMR

Field\_Strength = 11.7473579[T] (500[MHz])  
 X\_Acq\_Duration = 0.83361792[s]  
 X\_Domain = 13C  
 X\_Freq = 125.76529768[MHz]  
 X\_Offset = 100[ppm]  
 X\_Points = 32768  
 X\_Prescans = 4  
 X\_Resolution = 1.19959034[Hz]  
 X\_Sweep = 39.3081761[kHz]  
 X\_Sweep\_Clipped = 31.44654088[kHz]  
 Irr\_Domain = Proton  
 Irr\_Freq = 500.15991521[MHz]  
 Irr\_Offset = 5.0[ppm]  
 Clipped = FALSE  
 Scans = 1024  
 Total\_Scans = 1024

Relaxation\_Delay = 2[s]  
 Recvr\_Gain = 58  
 Temp\_Get = 20.2[dC]  
 X\_90\_Width = 32.3[us]  
 X\_Acq\_Time = 0.83361792[s]  
 X\_Angle = 30[deg]  
 X\_Atn = 10[dB]  
 X\_Pulse = 10.76666667[us]  
 Irr\_Atn\_Dec = 17.693[dB]  
 Irr\_Atn\_Noe = 17.693[dB]  
 Irr\_Noise = WALTZ  
 Irr\_Pwidth = 92[us]  
 Decoupling = TRUE  
 Initial\_Wait = 1[s]  
 Noe = TRUE  
 Noe\_Time = 2[s]  
 Repetition\_Time = 2.83361792[s]

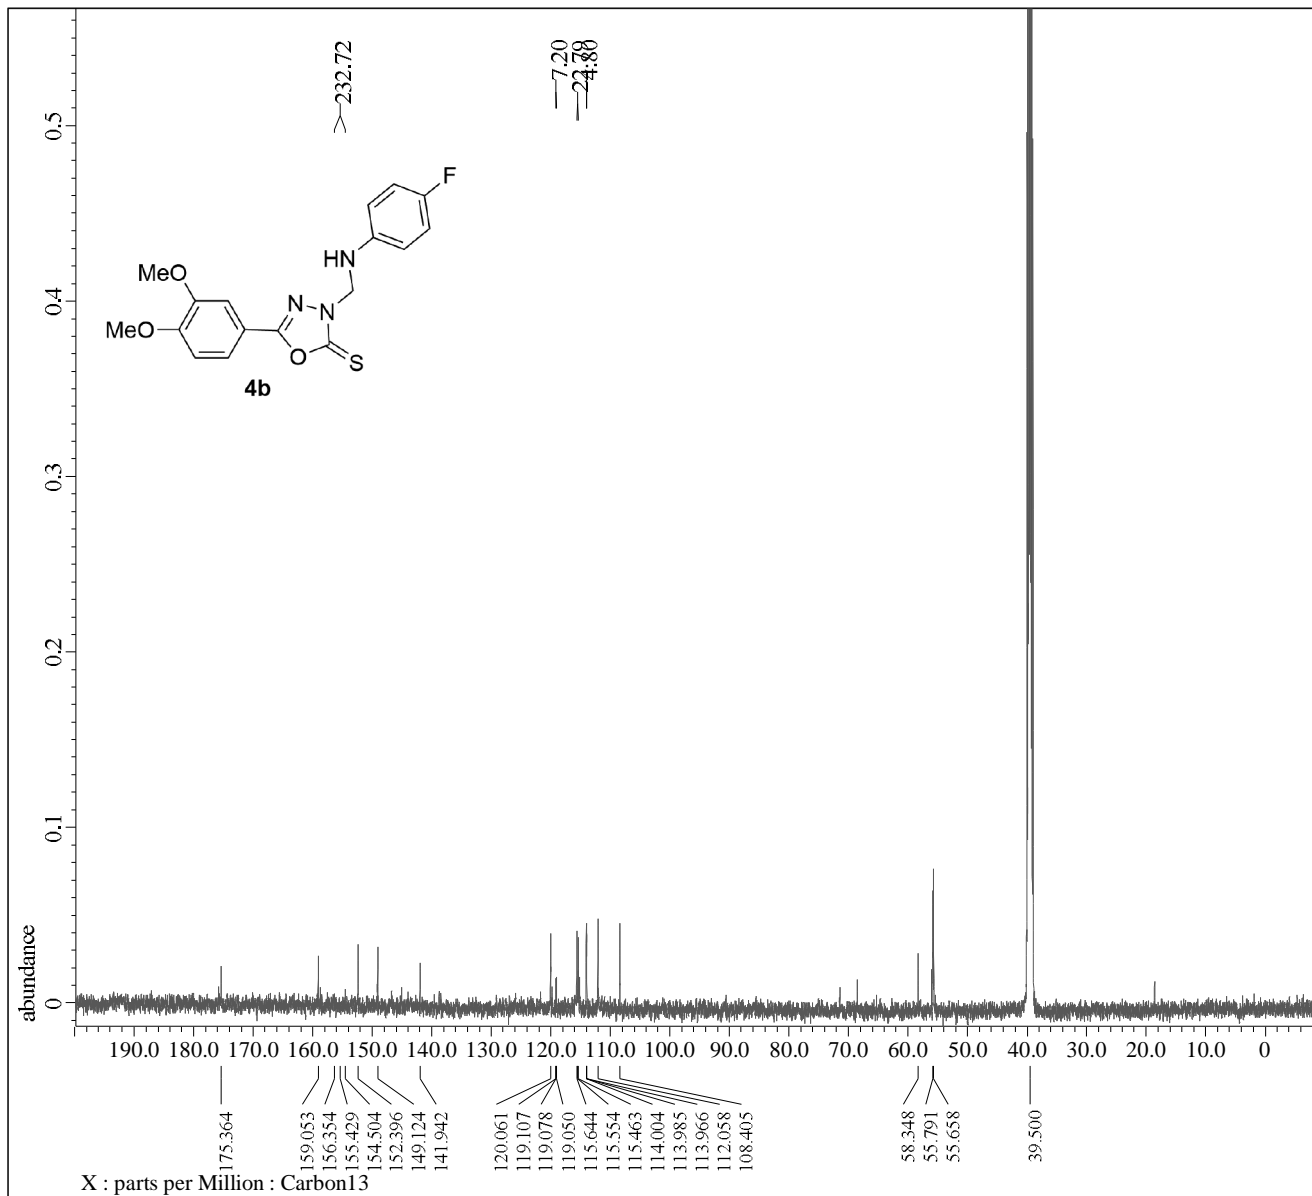

Filename = Prof.DR Ali Elemam\_DM\_11\_p  
 Author = delta  
 Experiment = proton.jxp  
 Sample\_Id = Prof.DR Ali Elemam\_DM\_11  
 Solvent = DMSO-D6  
 Creation\_Time = 30-DEC-2020 14:12:33  
 Revision\_Time = 6-FEB-2021 09:12:15  
 Current\_Time = 6-FEB-2021 09:12:41

Comment = single\_pulse  
 Data\_Format = 1D COMPLEX  
 Dim\_Size = 13107  
 Dim\_Title = Proton  
 Dim\_Units = [ppm]  
 Dimensions = X  
 Site = JNM-ECA500II  
 Spectrometer = DELTA2\_NMR

Field\_Strength = 11.7473579[T] (500[MHz])  
 X\_Acq\_Duration = 1.24780544[s]  
 X\_Domain = 1H  
 X\_Freq = 500.15991521[MHz]  
 X\_Offset = 7.0[ppm]  
 X\_Points = 16384  
 X\_Prescans = 1  
 X\_Resolution = 0.80140699[Hz]  
 X\_Sweep = 13.1302521[kHz]  
 X\_Sweep\_Clippped = 10.50420168[kHz]  
 Irr\_Domain = Proton  
 Irr\_Freq = 500.15991521[MHz]  
 Irr\_Offset = 5.0[ppm]  
 Tri\_Domain = Proton  
 Tri\_Freq = 500.15991521[MHz]  
 Tri\_Offset = 5.0[ppm]  
 Clipped = FALSE  
 Scans = 40  
 Total\_Scans = 40

Relaxation\_Delay = 5[s]  
 Recvr\_Gain = 50  
 Temp\_Get = 18.8[dC]  
 X\_90\_Width = 16[us]  
 X\_Acq\_Time = 1.24780544[s]  
 X\_Angle = 45[deg]  
 X\_Atn = 2.5[dB]  
 X\_Pulse = 8[us]  
 Irr\_Mode = Off  
 Tri\_Mode = Off  
 Dante\_Presat = FALSE  
 Initial\_Wait = 1[s]  
 Repetition\_Time = 6.24780544[s]

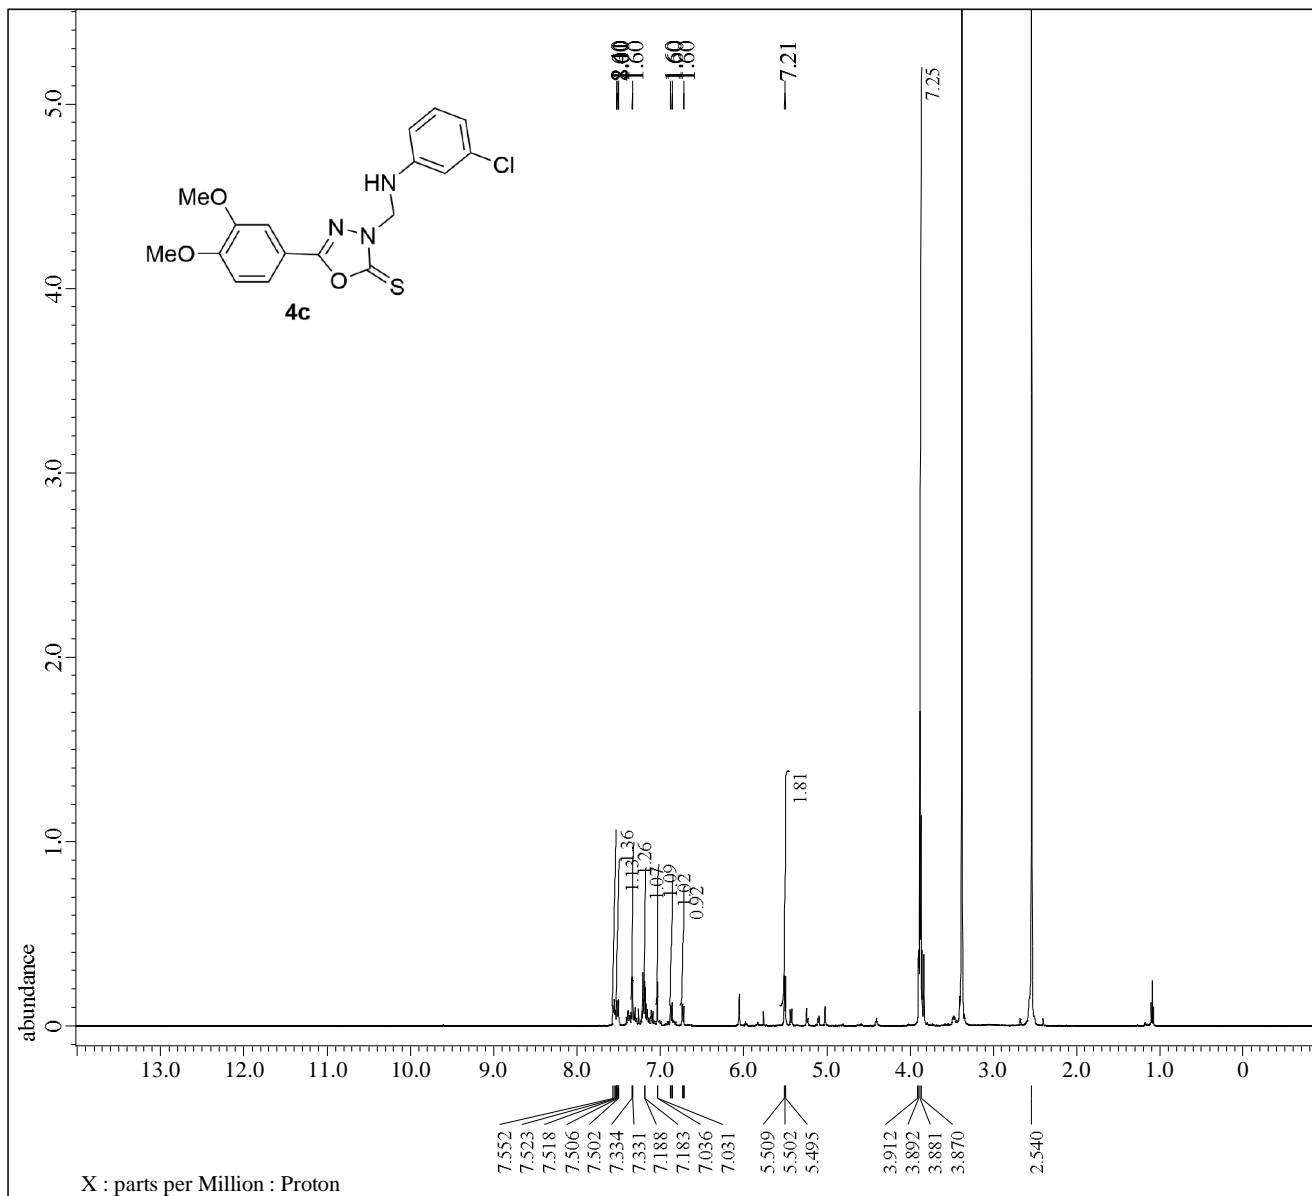

X : parts per Million : Proton



Filename = Prof.DR Ali Elemam\_DM\_11\_c  
 Author = delta  
 Experiment = carbon.jxp  
 Sample\_Id = Prof.DR Ali Elemam\_DM\_11  
 Solvent = DMSO-D6  
 Creation\_Time = 25-JAN-2021 22:07:07  
 Revision\_Time = 5-FEB-2021 04:17:14  
 Current\_Time = 5-FEB-2021 04:17:59

Comment = single pulse decoupled gat  
 Data\_Format = 1D COMPLEX  
 Dim\_Size = 26214  
 Dim\_Title = Carbon13  
 Dim\_Units = [ppm]  
 Dimensions = X  
 Site = JNM-ECA500II  
 Spectrometer = DELTA2\_NMR

Field\_Strength = 11.7473579[T] (500[MHz])  
 X\_Acq\_Duration = 0.83361792[s]  
 X\_Domain = 13C  
 X\_Freq = 125.76529768[MHz]  
 X\_Offset = 100[ppm]  
 X\_Points = 32768  
 X\_Prescans = 4  
 X\_Resolution = 1.19959034[Hz]  
 X\_Sweep = 39.3081761[kHz]  
 X\_Sweep\_Clipped = 31.44654088[kHz]  
 Irr\_Domain = Proton  
 Irr\_Freq = 500.15991521[MHz]  
 Irr\_Offset = 5.0[ppm]  
 Clipped = TRUE  
 Scans = 1024  
 Total\_Scans = 1024

Relaxation\_Delay = 2[s]  
 Recvr\_Gain = 58  
 Temp\_Get = 20.3[dC]  
 X\_90\_Width = 32.3[us]  
 X\_Acq\_Time = 0.83361792[s]  
 X\_Angle = 30[deg]  
 X\_Atn = 10[dB]  
 X\_Pulse = 10.76666667[us]  
 Irr\_Atn\_Dec = 17.693[dB]  
 Irr\_Atn\_Noe = 17.693[dB]  
 Irr\_Noise = WALTZ  
 Irr\_Pwidth = 92[us]  
 Decoupling = TRUE  
 Initial\_Wait = 1[s]  
 Noe = TRUE  
 Noe\_Time = 2[s]  
 Repetition\_Time = 2.83361792[s]

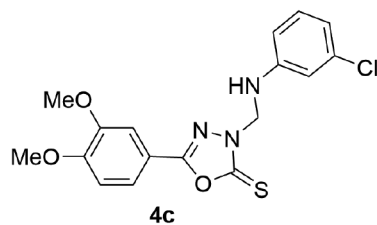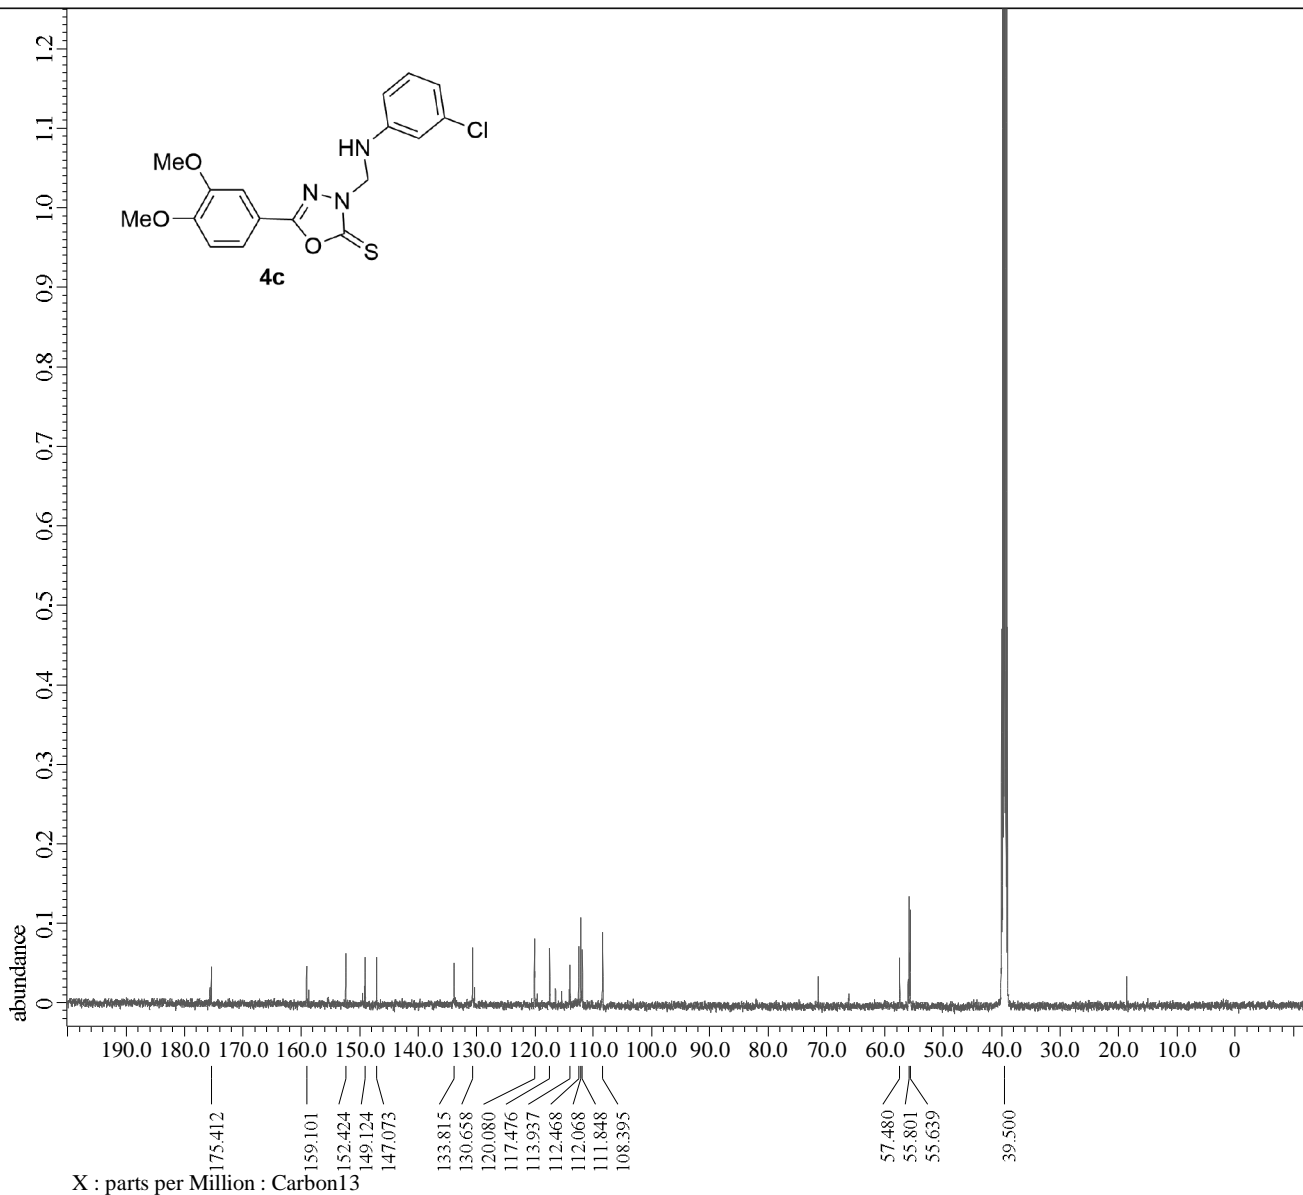

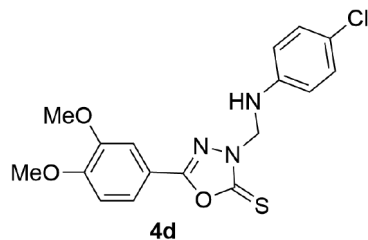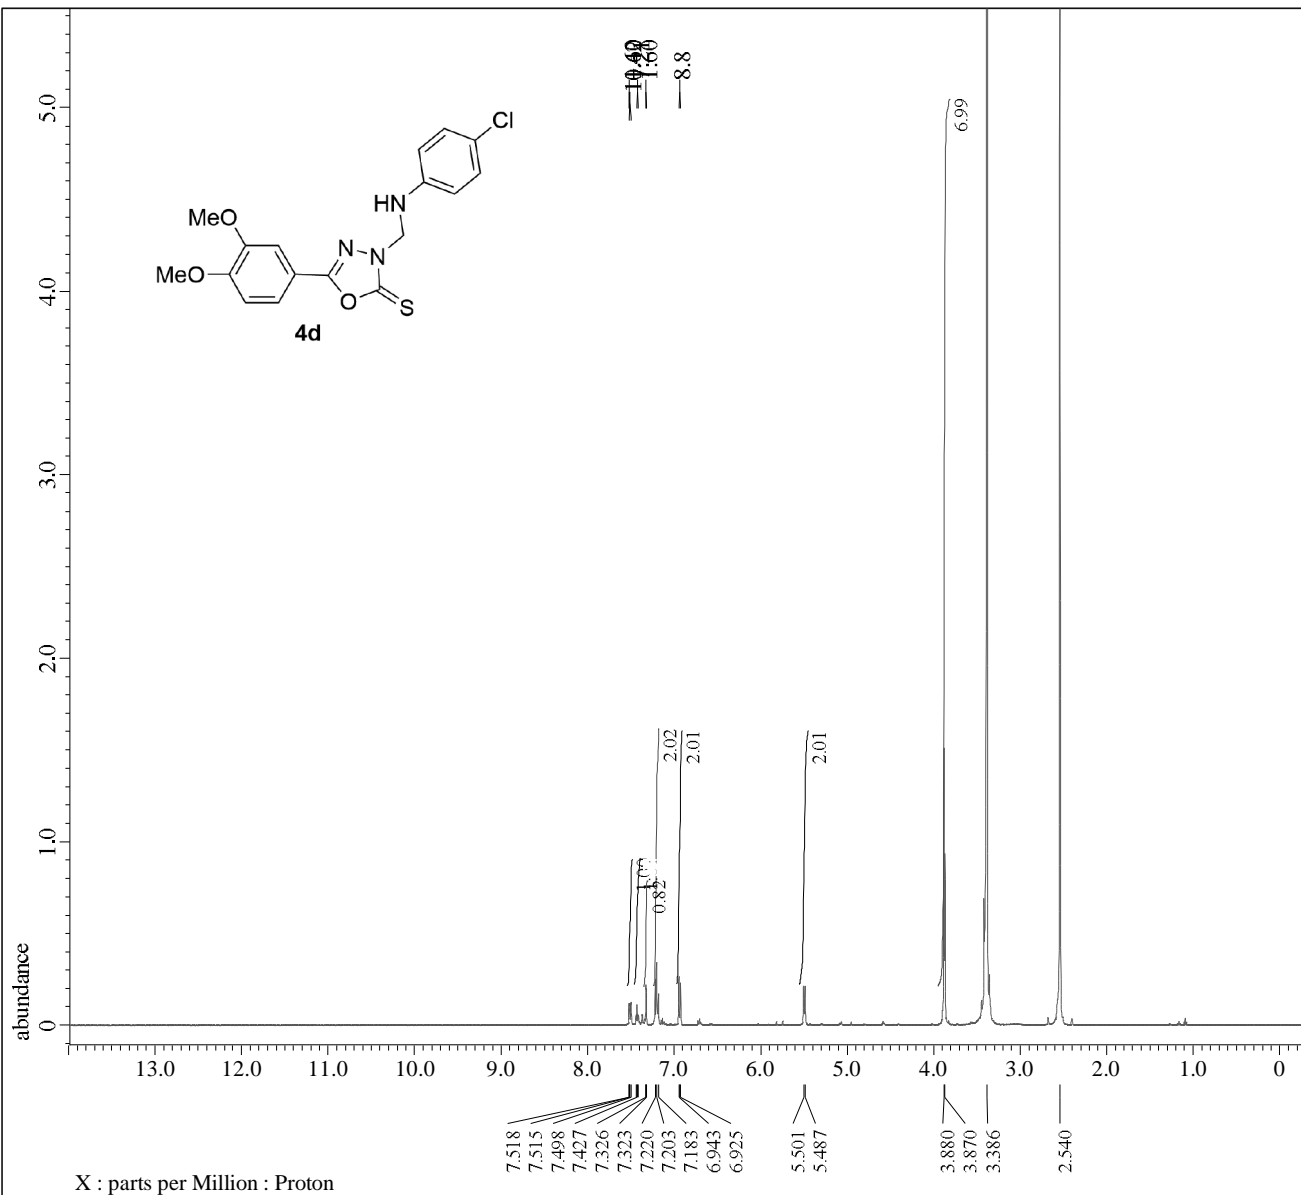

Filename = Prof.DR Ali Elemam\_DM\_5\_pr  
 Author = delta  
 Experiment = proton.jxp  
 Sample\_Id = Prof.DR Ali Elemam\_DM\_5  
 Solvent = DMSO-D6  
 Creation\_Time = 14-DEC-2020 12:23:13  
 Revision\_Time = 5-FEB-2021 23:41:06  
 Current\_Time = 5-FEB-2021 23:41:30

Comment = single\_pulse  
 Data\_Format = 1D COMPLEX  
 Dim\_Size = 13107  
 Dim\_Title = Proton  
 Dim\_Units = [ppm]  
 Dimensions = X  
 Site = JNM-ECA500II  
 Spectrometer = DELTA2\_NMR

Field\_Strength = 11.7473579[T] (500[MHz])  
 X\_Acq\_Duration = 1.24780544[s]  
 X\_Domain = 1H  
 X\_Freq = 500.15991521[MHz]  
 X\_Offset = 7.0[ppm]  
 X\_Points = 16384  
 X\_Prescans = 1  
 X\_Resolution = 0.80140699[Hz]  
 X\_Sweep = 13.1302521[kHz]  
 X\_Sweep\_Clippped = 10.50420168[kHz]  
 Irr\_Domain = Proton  
 Irr\_Freq = 500.15991521[MHz]  
 Irr\_Offset = 5.0[ppm]  
 Tri\_Domain = Proton  
 Tri\_Freq = 500.15991521[MHz]  
 Tri\_Offset = 5.0[ppm]  
 Clipped = FALSE  
 Scans = 40  
 Total\_Scans = 40

Relaxation\_Delay = 5[s]  
 Recvr\_Gain = 50  
 Temp\_Get = 18.8[dC]  
 X\_90\_Width = 16[us]  
 X\_Acq\_Time = 1.24780544[s]  
 X\_Angle = 45[deg]  
 X\_Atn = 2.5[dB]  
 X\_Pulse = 8[us]  
 Irr\_Mode = Off  
 Tri\_Mode = Off  
 Dante\_Presat = FALSE  
 Initial\_Wait = 1[s]  
 Repetition\_Time = 6.24780544[s]

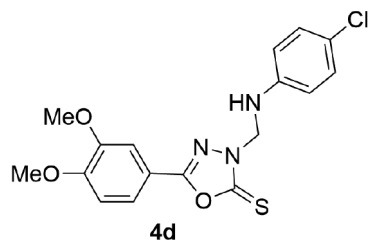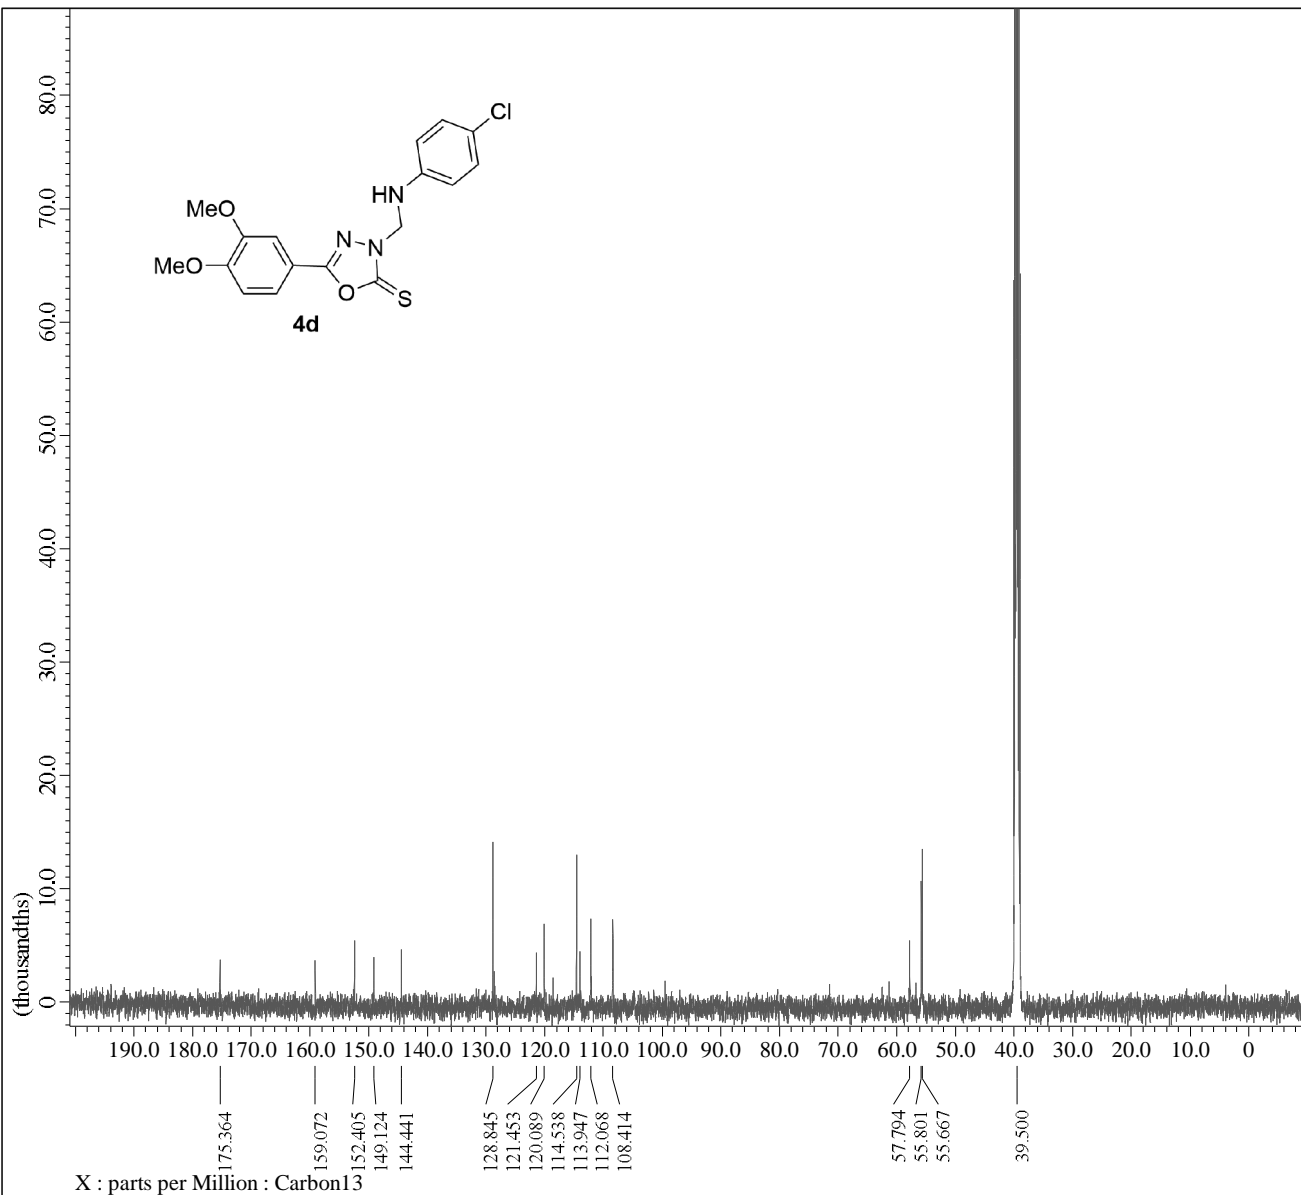

Filename = Prof.DR Ali Elemam\_DM\_5\_ca  
 Author = delta  
 Experiment = carbon.jxp  
 Sample\_Id = Prof.DR Ali Elemam\_DM\_5  
 Solvent = DMSO-D6  
 Creation\_Time = 22-DEC-2020 10:14:42  
 Revision\_Time = 5-FEB-2021 08:28:26  
 Current\_Time = 5-FEB-2021 08:29:17

Comment = single pulse decoupled gat  
 Data\_Format = 1D COMPLEX  
 Dim\_Size = 26214  
 Dim\_Title = Carbon13  
 Dim\_Units = [ppm]  
 Dimensions = X  
 Site = JNM-ECA500II  
 Spectrometer = DELTA2\_NMR

Field\_Strength = 11.7473579[T] (500[MHz])  
 X\_Acq\_Duration = 0.83361792[s]  
 X\_Domain = 13C  
 X\_Freq = 125.76529768[MHz]  
 X\_Offset = 100[ppm]  
 X\_Points = 32768  
 X\_Prescans = 4  
 X\_Resolution = 1.19959034[Hz]  
 X\_Sweep = 39.3081761[kHz]  
 X\_Sweep\_Clipped = 31.44654088[kHz]  
 Irr\_Domain = Proton  
 Irr\_Freq = 500.15991521[MHz]  
 Irr\_Offset = 5.0[ppm]  
 Clipped = FALSE  
 Scans = 1500  
 Total\_Scans = 1500

Relaxation\_Delay = 2[s]  
 Recvr\_Gain = 50  
 Temp\_Get = 19.6[dC]  
 X\_90\_Width = 32.3[us]  
 X\_Acq\_Time = 0.83361792[s]  
 X\_Angle = 30[deg]  
 X\_Atn = 10[dB]  
 X\_Pulse = 10.76666667[us]  
 Irr\_Atn\_Dec = 17.693[dB]  
 Irr\_Atn\_Noie = 17.693[dB]  
 Irr\_Noise = WALTZ  
 Irr\_Pwidth = 92[us]  
 Decoupling = TRUE  
 Initial\_Wait = 1[s]  
 Noe = TRUE  
 Noe\_Time = 2[s]  
 Repetition\_Time = 2.83361792[s]

Filename = Prof.DR Ali Elemam\_DM\_8\_pr  
 Author = delta  
 Experiment = proton.jxp  
 Sample\_Id = Prof.DR Ali Elemam\_DM\_8  
 Solvent = DMSO-D6  
 Creation\_Time = 30-DEC-2020 11:54:18  
 Revision\_Time = 6-FEB-2021 01:29:21  
 Current\_Time = 6-FEB-2021 01:29:26

Comment = single\_pulse  
 Data\_Format = 1D COMPLEX  
 Dim\_Size = 13107  
 Dim\_Title = Proton  
 Dim\_Units = [ppm]  
 Dimensions = X  
 Site = JNM-ECA500II  
 Spectrometer = DELTA2\_NMR

Field\_Strength = 11.7473579[T] (500[MHz])  
 X\_Acq\_Duration = 1.24780544[s]  
 X\_Domain = 1H  
 X\_Freq = 500.15991521[MHz]  
 X\_Offset = 7.0[ppm]  
 X\_Points = 16384  
 X\_Prescans = 1  
 X\_Resolution = 0.80140699[Hz]  
 X\_Sweep = 13.1302521[kHz]  
 X\_Sweep\_Clippped = 10.50420168[kHz]  
 Irr\_Domain = Proton  
 Irr\_Freq = 500.15991521[MHz]  
 Irr\_Offset = 5.0[ppm]  
 Tri\_Domain = Proton  
 Tri\_Freq = 500.15991521[MHz]  
 Tri\_Offset = 5.0[ppm]  
 Clipped = FALSE  
 Scans = 40  
 Total\_Scans = 40

Relaxation\_Delay = 5[s]  
 Recvr\_Gain = 50  
 Temp\_Get = 18[dc]  
 X\_90\_Width = 16[us]  
 X\_Acq\_Time = 1.24780544[s]  
 X\_Angle = 45[deg]  
 X\_Atn = 2.5[dB]  
 X\_Pulse = 8[us]  
 Irr\_Mode = Off  
 Tri\_Mode = Off  
 Dante\_Presat = FALSE  
 Initial\_Wait = 1[s]  
 Repetition\_Time = 6.24780544[s]

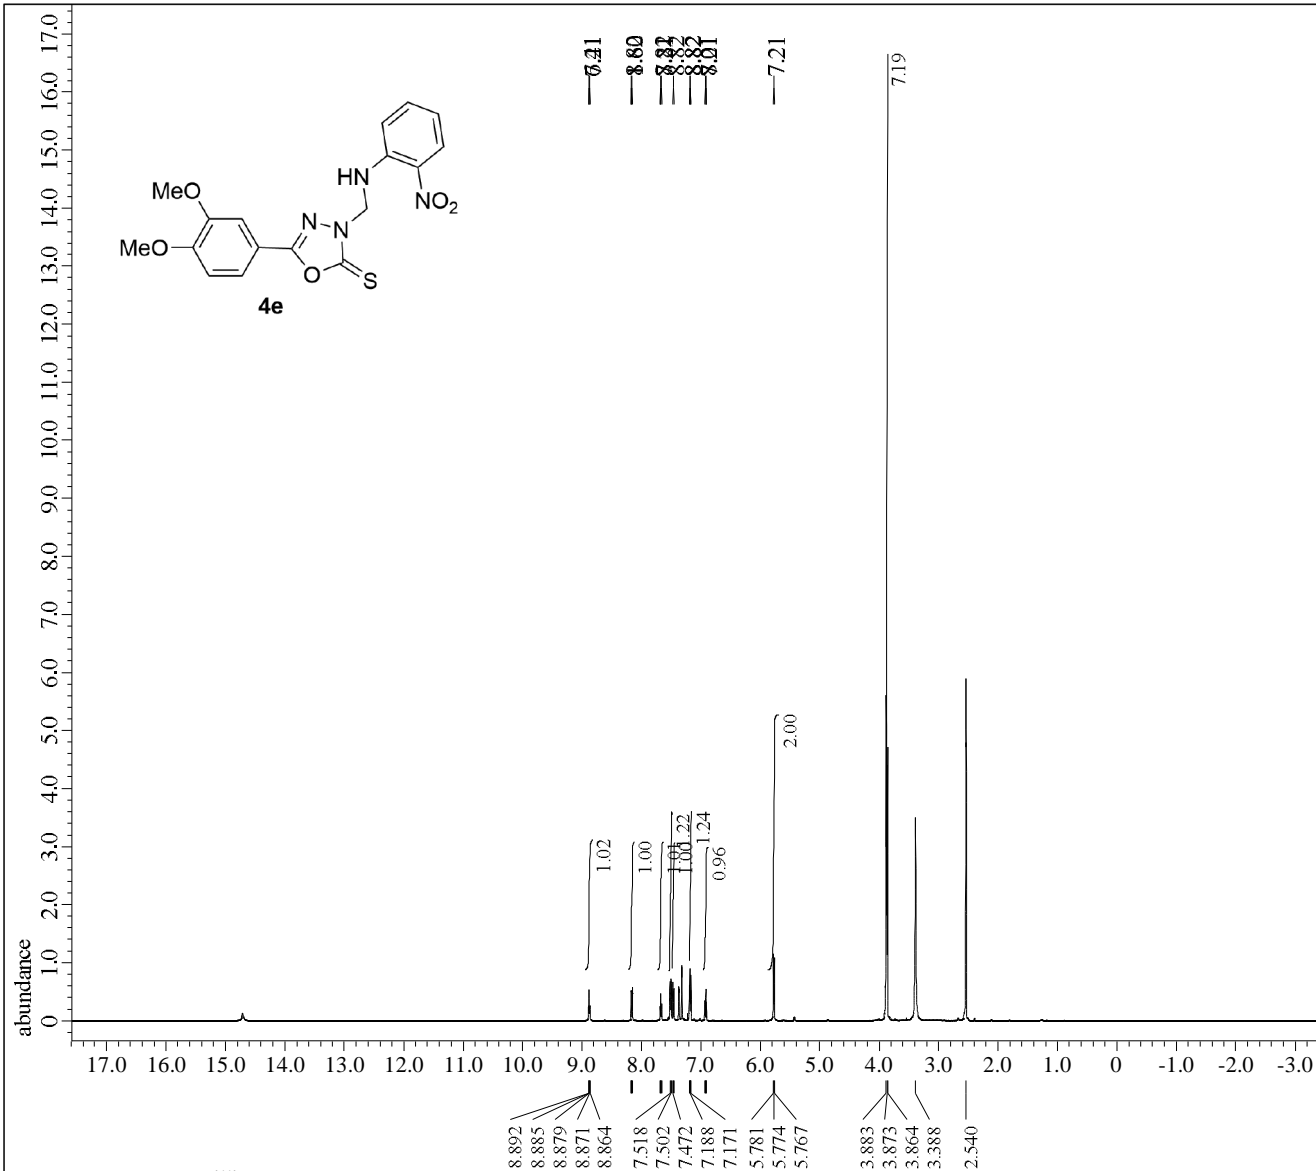

X : parts per Million : Proton

Filename = Prof.DR Ali Elemam\_DM\_8\_ca  
 Author = delta  
 Experiment = carbon.jxp  
 Sample\_Id = Prof.DR Ali Elemam\_DM\_8  
 Solvent = DMSO-D6  
 Creation\_Time = 25-JAN-2021 17:23:30  
 Revision\_Time = 5-FEB-2021 08:20:39  
 Current\_Time = 5-FEB-2021 08:23:10

Comment = single pulse decoupled gat  
 Data\_Format = 1D COMPLEX  
 Dim\_Size = 26214  
 Dim\_Title = Carbon13  
 Dim\_Units = [ppm]  
 Dimensions = X  
 Site = JNM-ECA500II  
 Spectrometer = DELTA2\_NMR

Field\_Strength = 11.7473579[T] (500[MHz])  
 X\_Acq\_Duration = 0.83361792[s]  
 X\_Domain = 13C  
 X\_Freq = 125.76529768[MHz]  
 X\_Offset = 100[ppm]  
 X\_Points = 32768  
 X\_Prescans = 4  
 X\_Resolution = 1.19959034[Hz]  
 X\_Sweep = 39.3081761[kHz]  
 X\_Sweep\_Clipped = 31.44654088[kHz]  
 Irr\_Domain = Proton  
 Irr\_Freq = 500.15991521[MHz]  
 Irr\_Offset = 5.0[ppm]  
 Clipped = FALSE  
 Scans = 1024  
 Total\_Scans = 1024

Relaxation\_Delay = 2[s]  
 Recvr\_Gain = 58  
 Temp\_Get = 20.1[dC]  
 X\_90\_Width = 32.3[us]  
 X\_Acq\_Time = 0.83361792[s]  
 X\_Angle = 30[deg]  
 X\_Atn = 10[dB]  
 X\_Pulse = 10.76666667[us]  
 Irr\_Atn\_Dec = 17.693[dB]  
 Irr\_Atn\_Noise = 17.693[dB]  
 Irr\_Noise = WALTZ  
 Irr\_Pwidth = 92[us]  
 Decoupling = TRUE  
 Initial\_Wait = 1[s]  
 Noe = TRUE  
 Noe\_Time = 2[s]  
 Repetition\_Time = 2.83361792[s]

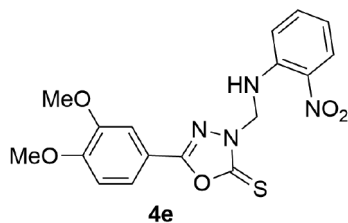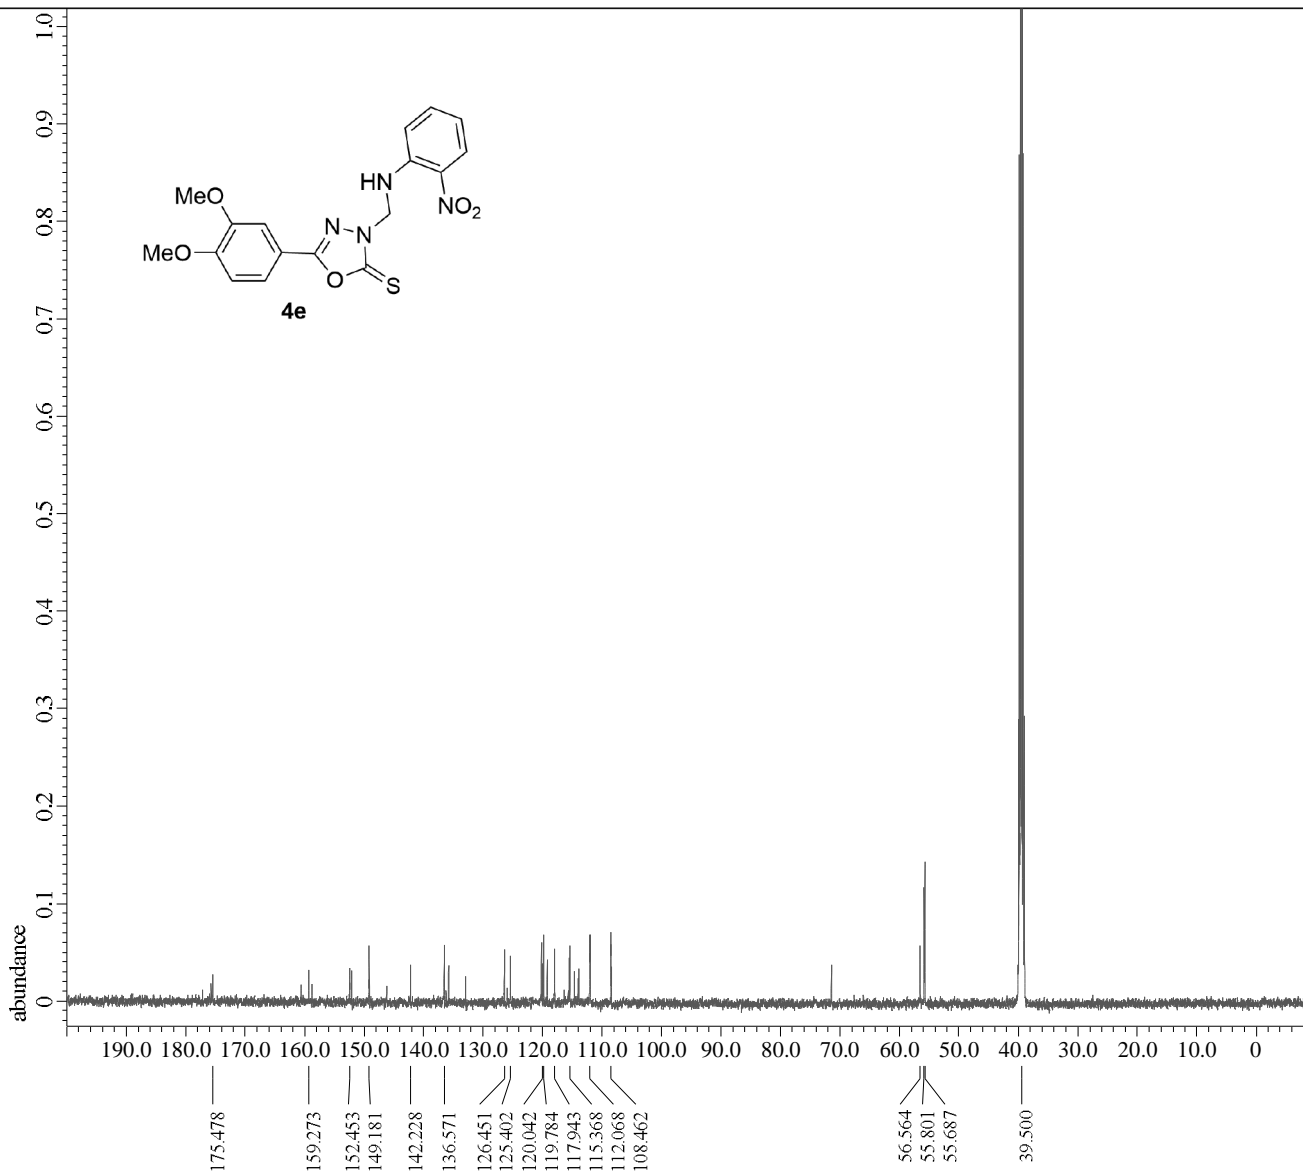

Filename = Prof.DR Ali Elemam\_DM\_9\_pr  
 Author = delta  
 Experiment = proton.jxp  
 Sample\_Id = Prof.DR Ali Elemam\_DM\_9  
 Solvent = DMSO-D6  
 Creation\_Time = 30-DEC-2020 12:04:05  
 Revision\_Time = 6-FEB-2021 08:22:16  
 Current\_Time = 6-FEB-2021 08:23:07

Comment = single\_pulse  
 Data\_Format = 1D\_COMPLEX  
 Dim\_Size = 13107  
 Dim\_Title = Proton  
 Dim\_Units = [ppm]  
 Dimensions = X  
 Site = JNM-ECA500II  
 Spectrometer = DELTA2\_NMR

Field\_Strength = 11.7473579[T] (500[MHz])  
 X\_Acq\_Duration = 1.24780544[s]  
 X\_Domain = 1H  
 X\_Freq = 500.15991521[MHz]  
 X\_Offset = 7.0[ppm]  
 X\_Points = 16384  
 X\_Prescans = 1  
 X\_Resolution = 0.80140699[Hz]  
 X\_Sweep = 13.1302521[kHz]  
 X\_Sweep\_Clippped = 10.50420168[kHz]  
 Irr\_Domain = Proton  
 Irr\_Freq = 500.15991521[MHz]  
 Irr\_Offset = 5.0[ppm]  
 Tri\_Domain = Proton  
 Tri\_Freq = 500.15991521[MHz]  
 Tri\_Offset = 5.0[ppm]  
 Clipped = FALSE  
 Scans = 40  
 Total\_Scans = 40

Relaxation\_Delay = 5[s]  
 Recvr\_Gain = 50  
 Temp\_Get = 18.3[dC]  
 X\_90\_Width = 16[us]  
 X\_Acq\_Time = 1.24780544[s]  
 X\_Angle = 45[deg]  
 X\_Atn = 2.5[dB]  
 X\_Pulse = 8[us]  
 Irr\_Mode = Off  
 Tri\_Mode = Off  
 Dante\_Presat = FALSE  
 Initial\_Wait = 1[s]  
 Repetition\_Time = 6.24780544[s]

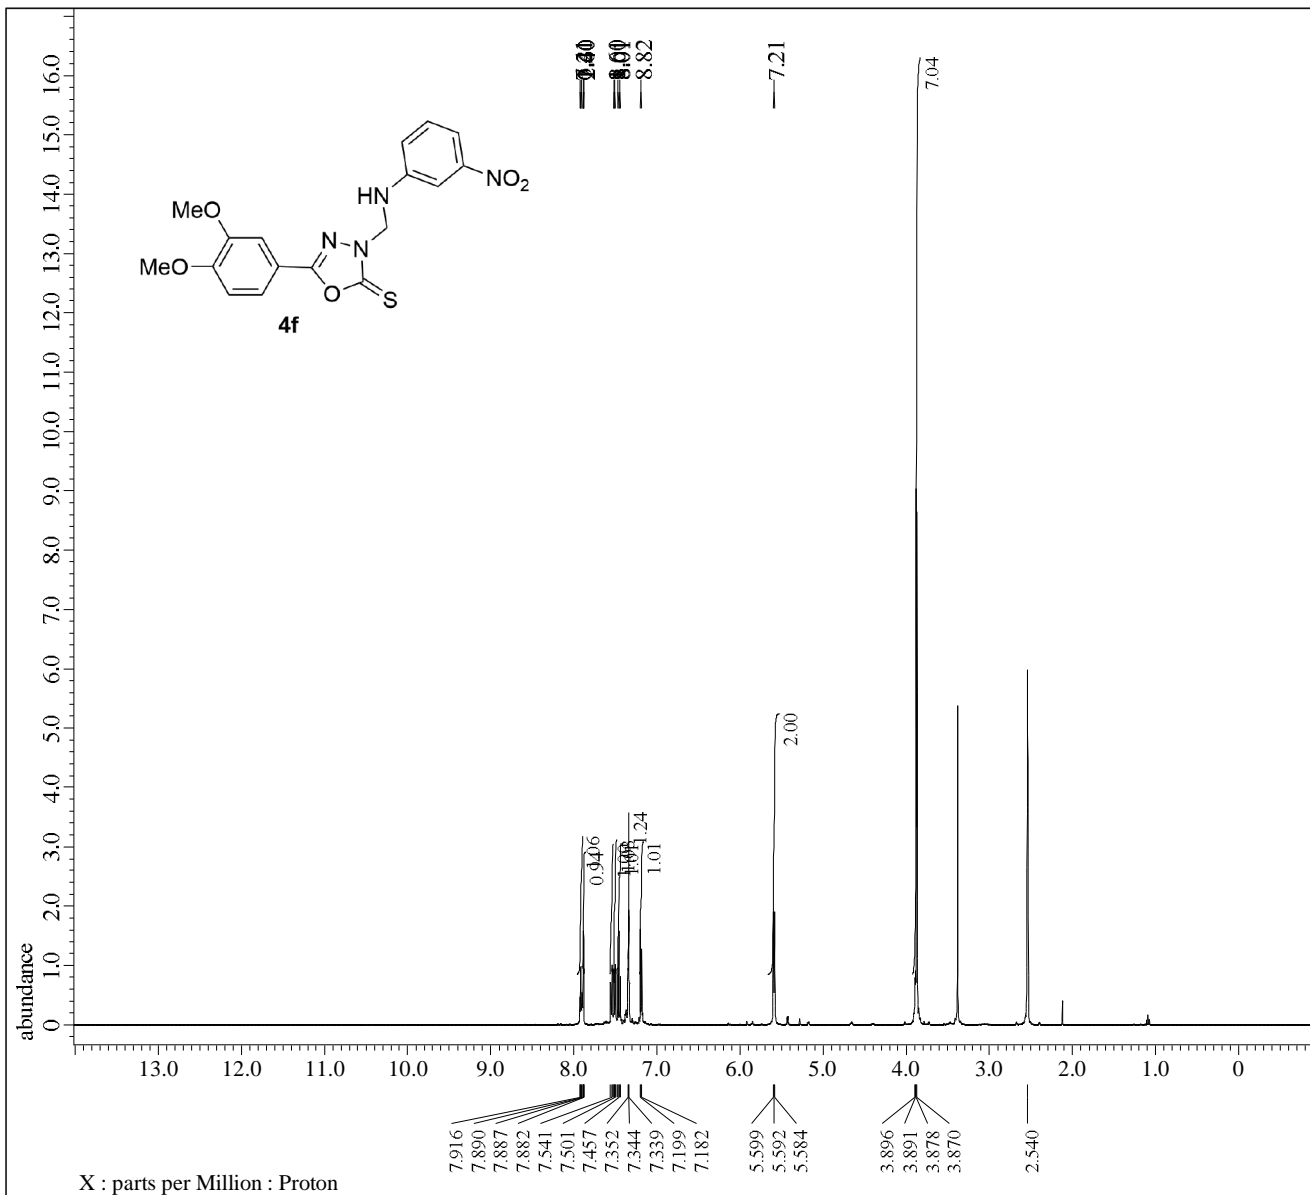

X : parts per Million : Proton

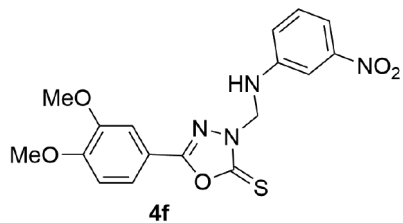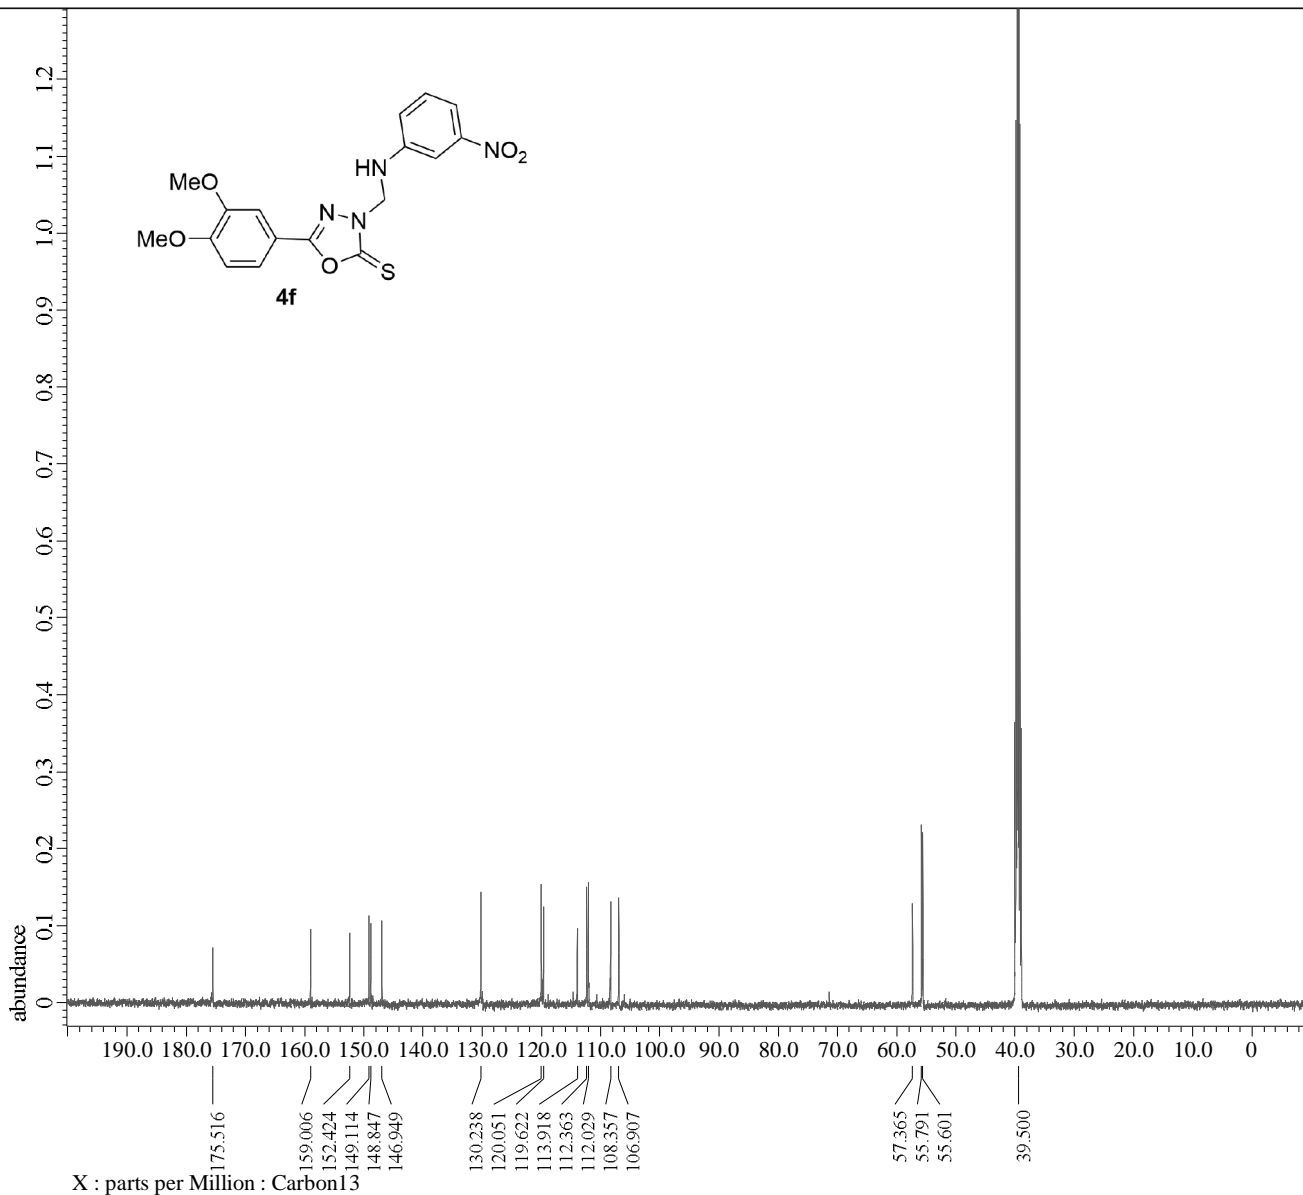

Filename = Prof.DR Ali Elemam\_DM\_9\_ca  
 Author = delta  
 Experiment = carbon.jxp  
 Sample\_Id = Prof.DR Ali Elemam\_DM\_9  
 Solvent = DMSO-D6  
 Creation\_Time = 25-JAN-2021 18:19:54  
 Revision\_Time = 5-FEB-2021 03:37:02  
 Current\_Time = 5-FEB-2021 03:47:42

Comment = single pulse decoupled gat  
 Data\_Format = 1D COMPLEX  
 Dim\_Size = 26214  
 Dim\_Title = Carbon13  
 Dim\_Units = [ppm]  
 Dimensions = X  
 Site = JNM-ECA500II  
 Spectrometer = DELTA2\_NMR

Field\_Strength = 11.7473579[T] (500[MHz])  
 X\_Acq\_Duration = 0.83361792[s]  
 X\_Domain = 13C  
 X\_Freq = 125.76529768[MHz]  
 X\_Offset = 100[ppm]  
 X\_Points = 32768  
 X\_Prescans = 4  
 X\_Resolution = 1.19959034[Hz]  
 X\_Sweep = 39.3081761[kHz]  
 X\_Sweep\_Clipped = 31.44654088[kHz]  
 Irr\_Domain = Proton  
 Irr\_Freq = 500.15991521[MHz]  
 Irr\_Offset = 5.0[ppm]  
 Clipped = TRUE  
 Scans = 1024  
 Total\_Scans = 1024

Relaxation\_Delay = 2[s]  
 Recvr\_Gain = 58  
 Temp\_Get = 19.6[dC]  
 X\_90\_Width = 32.3[us]  
 X\_Acq\_Time = 0.83361792[s]  
 X\_Angle = 30[deg]  
 X\_Atn = 10[dB]  
 X\_Pulse = 10.76666667[us]  
 Irr\_Atn\_Dec = 17.693[dB]  
 Irr\_Atn\_Noise = 17.693[dB]  
 Irr\_Noise = WALTZ  
 Irr\_Pwidth = 92[us]  
 Decoupling = TRUE  
 Initial\_Wait = 1[s]  
 Noe = TRUE  
 Noe\_Time = 2[s]  
 Repetition\_Time = 2.83361792[s]

Filename = Prof.DR Ali Elemam\_DM\_10\_p  
 Author = delta  
 Experiment = proton.jxp  
 Sample\_Id = Prof.DR Ali Elemam\_DM\_10  
 Solvent = DMSO-D6  
 Creation\_Time = 30-DEC-2020 12:13:04  
 Revision\_Time = 6-FEB-2021 08:54:27  
 Current\_Time = 6-FEB-2021 08:55:41

Comment = single\_pulse  
 Data\_Format = 1D COMPLEX  
 Dim\_Size = 13107  
 Dim\_Title = Proton  
 Dim\_Units = [ppm]  
 Dimensions = X  
 Site = JNM-ECA500II  
 Spectrometer = DELTA2\_NMR

Field\_Strength = 11.7473579[T] (500[MHz])  
 X\_Acq\_Duration = 1.24780544[s]  
 X\_Domain = 1H  
 X\_Freq = 500.15991521[MHz]  
 X\_Offset = 7.0[ppm]  
 X\_Points = 16384  
 X\_Prescans = 1  
 X\_Resolution = 0.80140699[Hz]  
 X\_Sweep = 13.1302521[kHz]  
 X\_Sweep\_Clipped = 10.50420168[kHz]  
 Irr\_Domain = Proton  
 Irr\_Freq = 500.15991521[MHz]  
 Irr\_Offset = 5.0[ppm]  
 Tri\_Domain = Proton  
 Tri\_Freq = 500.15991521[MHz]  
 Tri\_Offset = 5.0[ppm]  
 Clipped = FALSE  
 Scans = 40  
 Total\_Scans = 40

Relaxation\_Delay = 5[s]  
 Recvr\_Gain = 50  
 Temp\_Get = 18.3[dC]  
 X\_90\_Width = 16[us]  
 X\_Acq\_Time = 1.24780544[s]  
 X\_Angle = 45[deg]  
 X\_Atn = 2.5[dB]  
 X\_Pulse = 8[us]  
 Irr\_Mode = Off  
 Tri\_Mode = Off  
 Dante\_Presat = FALSE  
 Initial\_Wait = 1[s]  
 Repetition\_Time = 6.24780544[s]

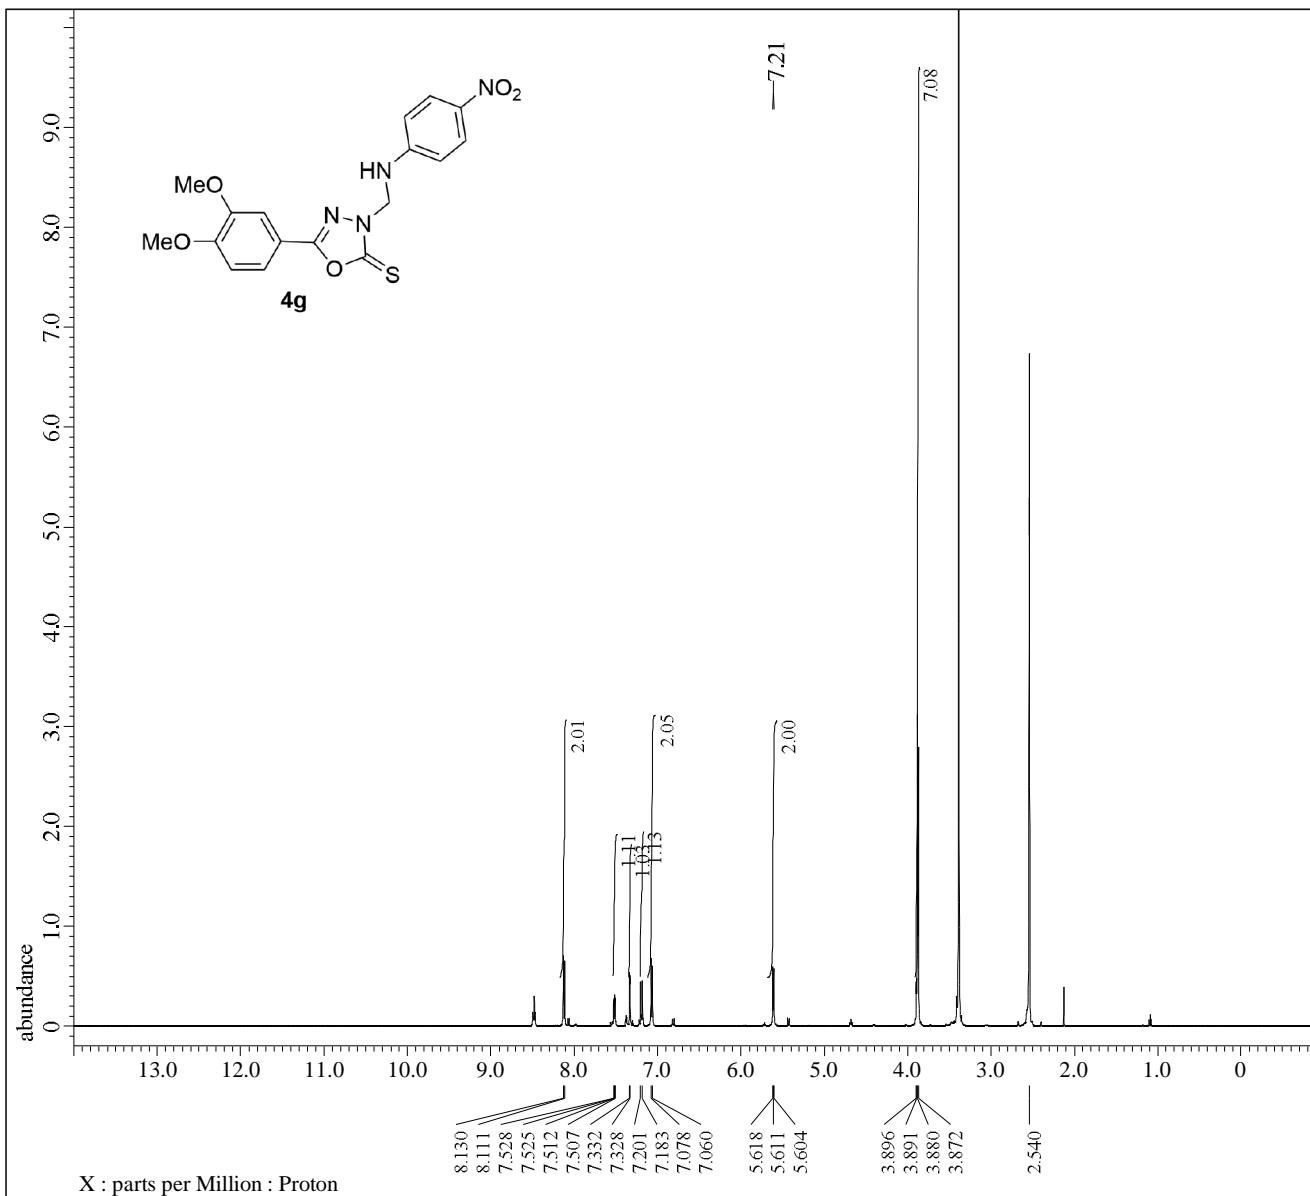

X : parts per Million : Proton



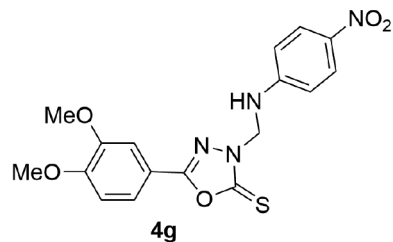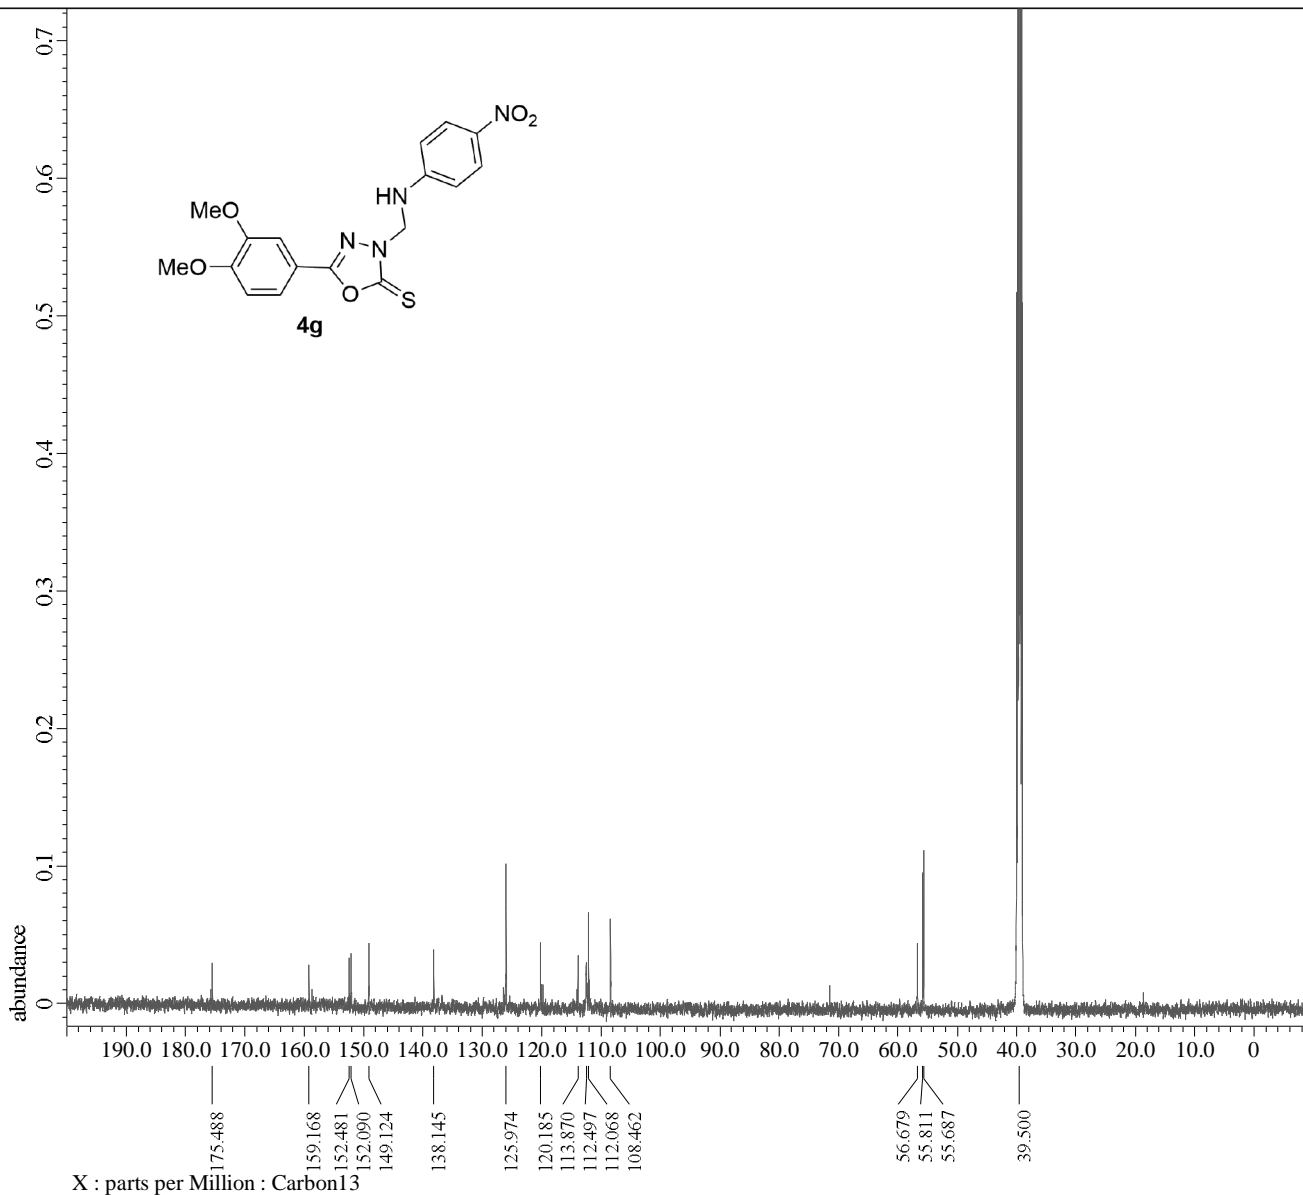

Filename = Prof.DR Ali Elemam\_DM\_10\_c  
 Author = delta  
 Experiment = carbon.jxp  
 Sample\_Id = Prof.DR Ali Elemam\_DM\_10  
 Solvent = DMSO-D6  
 Creation\_Time = 25-JAN-2021 21:09:57  
 Revision\_Time = 5-FEB-2021 04:11:51  
 Current\_Time = 5-FEB-2021 04:13:33

Comment = single pulse decoupled gat  
 Data\_Format = 1D COMPLEX  
 Dim\_Size = 26214  
 Dim\_Title = Carbon13  
 Dim\_Units = [ppm]  
 Dimensions = X  
 Site = JNM-ECA500II  
 Spectrometer = DELTA2\_NMR

Field\_Strength = 11.7473579[T] (500[MHz])  
 X\_Acq\_Duration = 0.83361792[s]  
 X\_Domain = 13C  
 X\_Freq = 125.76529768[MHz]  
 X\_Offset = 100[ppm]  
 X\_Points = 32768  
 X\_Prescans = 4  
 X\_Resolution = 1.19959034[Hz]  
 X\_Sweep = 39.3081761[kHz]  
 X\_Sweep\_Clipped = 31.44654088[kHz]  
 Irr\_Domain = Proton  
 Irr\_Freq = 500.15991521[MHz]  
 Irr\_Offset = 5.0[ppm]  
 Clipped = FALSE  
 Scans = 1024  
 Total\_Scans = 1024

Relaxation\_Delay = 2[s]  
 Recvr\_Gain = 58  
 Temp\_Get = 19.7[dC]  
 X\_90\_Width = 32.3[us]  
 X\_Acq\_Time = 0.83361792[s]  
 X\_Angle = 30[deg]  
 X\_Atn = 10[dB]  
 X\_Pulse = 10.76666667[us]  
 Irr\_Atn\_Dec = 17.693[dB]  
 Irr\_Atn\_Noe = 17.693[dB]  
 Irr\_Noise = WALTZ  
 Irr\_Pwidth = 92[us]  
 Decoupling = TRUE  
 Initial\_Wait = 1[s]  
 Noe = TRUE  
 Noe\_Time = 2[s]  
 Repetition\_Time = 2.83361792[s]

Filename = Prof.DR Ali Elemam\_DM\_12\_p  
 Author = delta  
 Experiment = proton.jxp  
 Sample\_Id = Prof.DR Ali Elemam\_DM\_12  
 Solvent = DMSO-D6  
 Creation\_Time = 30-DEC-2020 14:22:18  
 Revision\_Time = 6-FEB-2021 09:38:13  
 Current\_Time = 6-FEB-2021 09:38:30

Comment = single\_pulse  
 Data\_Format = 1D\_COMPLEX  
 Dim\_Size = 13107  
 Dim\_Title = Proton  
 Dim\_Units = [ppm]  
 Dimensions = X  
 Site = JNM-ECA500II  
 Spectrometer = DELTA2\_NMR

Field\_Strength = 11.7473579[T] (500[MHz])  
 X\_Acq\_Duration = 1.24780544[s]  
 X\_Domain = 1H  
 X\_Freq = 500.15991521[MHz]  
 X\_Offset = 7.0[ppm]  
 X\_Points = 16384  
 X\_Prescans = 1  
 X\_Resolution = 0.80140699[Hz]  
 X\_Sweep = 13.1302521[kHz]  
 X\_Sweep\_Clippped = 10.50420168[kHz]  
 Irr\_Domain = Proton  
 Irr\_Freq = 500.15991521[MHz]  
 Irr\_Offset = 5.0[ppm]  
 Tri\_Domain = Proton  
 Tri\_Freq = 500.15991521[MHz]  
 Tri\_Offset = 5.0[ppm]  
 Clipped = FALSE  
 Scans = 40  
 Total\_Scans = 40

Relaxation\_Delay = 5[s]  
 Recvr\_Gain = 50  
 Temp\_Get = 19.2[dC]  
 X\_90\_Width = 16[us]  
 X\_Acq\_Time = 1.24780544[s]  
 X\_Angle = 45[deg]  
 X\_Atn = 2.5[dB]  
 X\_Pulse = 8[us]  
 Irr\_Mode = Off  
 Tri\_Mode = Off  
 Dante\_Preset = FALSE  
 Initial\_Wait = 1[s]  
 Repetition\_Time = 6.24780544[s]

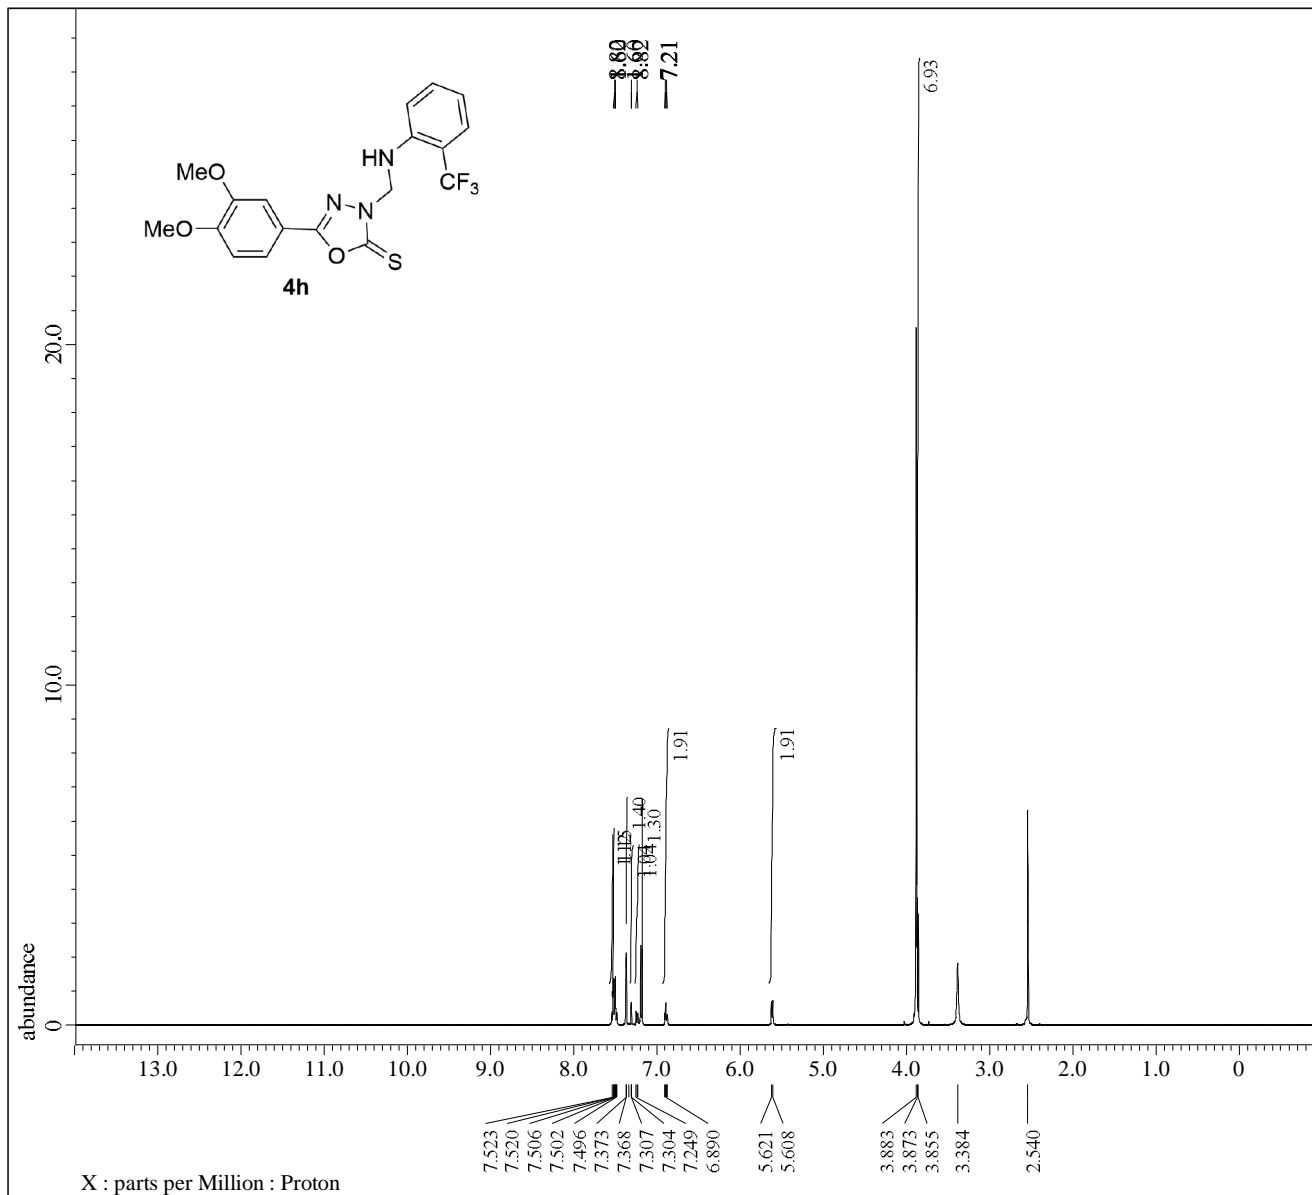

Filename = Prof.DR Ali Elemam\_DM\_12\_c  
 Author = delta  
 Experiment = carbon.jxp  
 Sample\_Id = Prof.DR Ali Elemam\_DM\_12  
 Solvent = DMSO-D6  
 Creation\_Time = 25-JAN-2021 23:04:23  
 Revision\_Time = 5-FEB-2021 04:27:37  
 Current\_Time = 5-FEB-2021 04:30:28

Comment = single pulse decoupled gat  
 Data\_Format = 1D COMPLEX  
 Dim\_Size = 26214  
 Dim\_Title = Carbon13  
 Dim\_Units = [ppm]  
 Dimensions = X  
 Site = JNM-ECA500II  
 Spectrometer = DELTA2\_NMR

Field\_Strength = 11.7473579[T] (500[MHz])  
 X\_Acq\_Duration = 0.83361792[s]  
 X\_Domain = 13C  
 X\_Freq = 125.76529768[MHz]  
 X\_Offset = 100[ppm]  
 X\_Points = 32768  
 X\_Prescans = 4  
 X\_Resolution = 1.19959034[Hz]  
 X\_Sweep = 39.3081761[kHz]  
 X\_Sweep\_Clipped = 31.44654088[kHz]  
 Irr\_Domain = Proton  
 Irr\_Freq = 500.15991521[MHz]  
 Irr\_Offset = 5.0[ppm]  
 Clipped = FALSE  
 Scans = 1024  
 Total\_Scans = 1024

Relaxation\_Delay = 2[s]  
 Recvr\_Gain = 58  
 Temp\_Get = 19.6[dC]  
 X\_90\_Width = 32.3[us]  
 X\_Acq\_Time = 0.83361792[s]  
 X\_Angle = 30[deg]  
 X\_Atn = 10[dB]  
 X\_Pulse = 10.76666667[us]  
 Irr\_Atn\_Dec = 17.693[dB]  
 Irr\_Atn\_Noe = 17.693[dB]  
 Irr\_Noise = WALTZ  
 Irr\_Pwidth = 92[us]  
 Decoupling = TRUE  
 Initial\_Wait = 1[s]  
 Noe = TRUE  
 Noe\_Time = 2[s]  
 Repetition\_Time = 2.83361792[s]

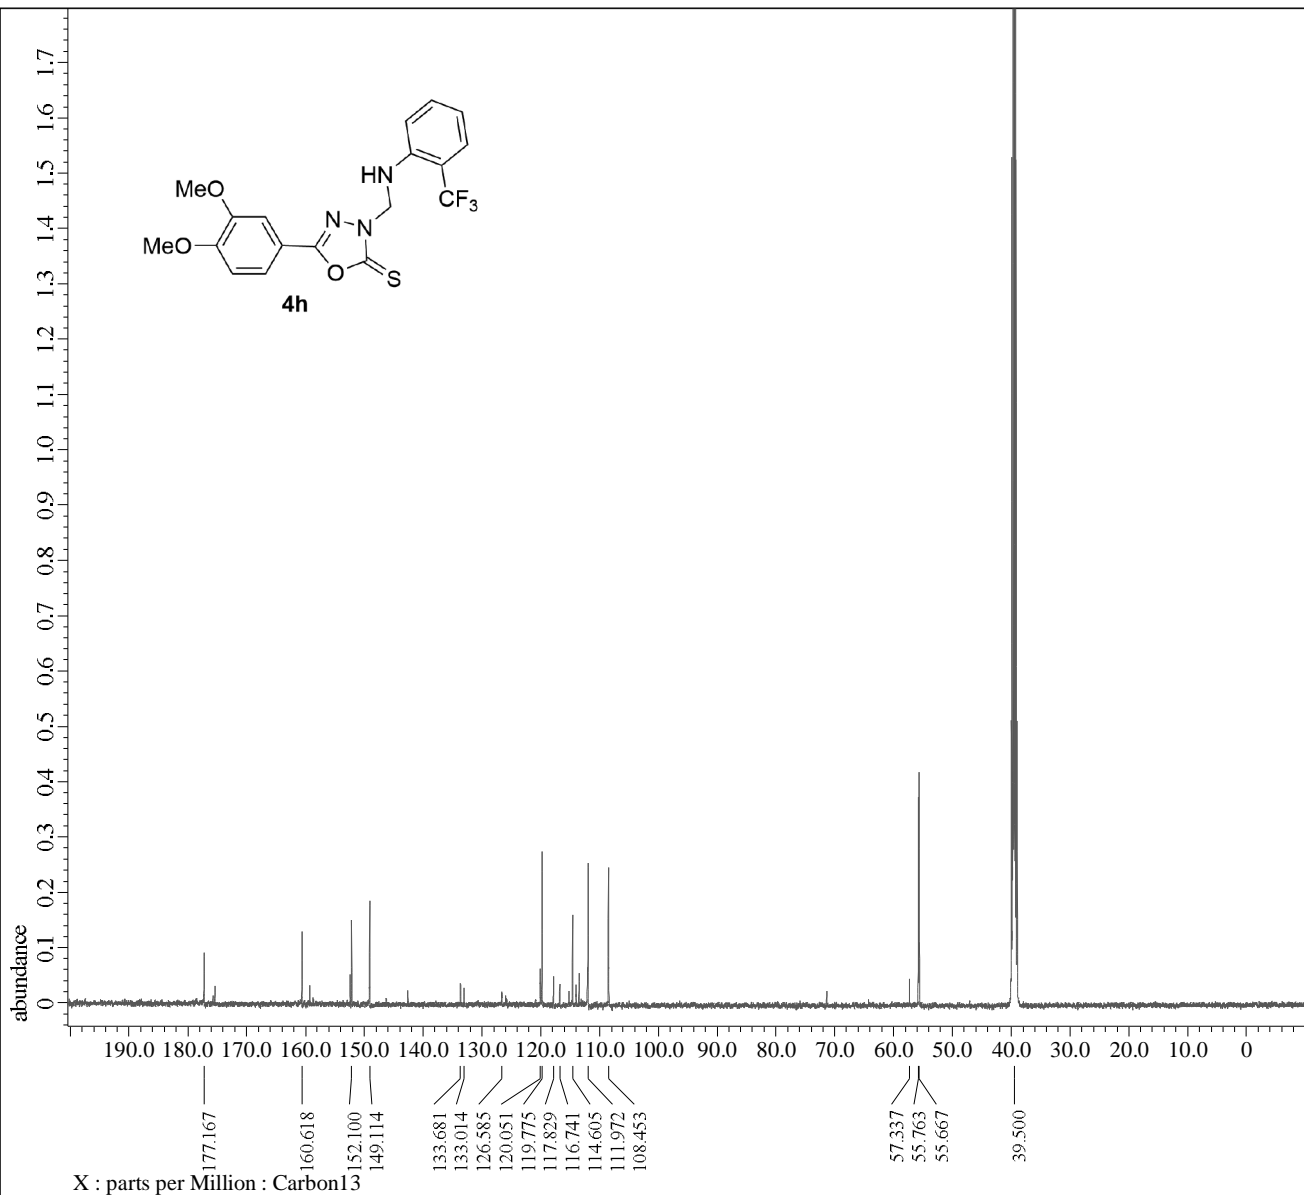

Filename = Prof.DR Ali Elemam\_DM\_13\_p  
 Author = delta  
 Experiment = proton.jxp  
 Sample\_Id = Prof.DR Ali Elemam\_DM\_13  
 Solvent = DMSO-D6  
 Creation\_Time = 30-DEC-2020 14:31:19  
 Revision\_Time = 6-FEB-2021 09:42:39  
 Current\_Time = 6-FEB-2021 09:44:24

Comment = single\_pulse  
 Data\_Format = 1D COMPLEX  
 Dim\_Size = 13107  
 Dim\_Title = Proton  
 Dim\_Units = [ppm]  
 Dimensions = X  
 Site = JNM-ECA500II  
 Spectrometer = DELTA2\_NMR

Field\_Strength = 11.7473579[T] (500[MHz])  
 X\_Acq\_Duration = 1.24780544[s]  
 X\_Domain = 1H  
 X\_Freq = 500.15991521[MHz]  
 X\_Offset = 7.0[ppm]  
 X\_Points = 16384  
 X\_Prescans = 1  
 X\_Resolution = 0.80140699[Hz]  
 X\_Sweep = 13.1302521[kHz]  
 X\_Sweep\_Clippped = 10.50420168[kHz]  
 Irr\_Domain = Proton  
 Irr\_Freq = 500.15991521[MHz]  
 Irr\_Offset = 5.0[ppm]  
 Tri\_Domain = Proton  
 Tri\_Freq = 500.15991521[MHz]  
 Tri\_Offset = 5.0[ppm]  
 Clipped = FALSE  
 Scans = 40  
 Total\_Scans = 40

Relaxation\_Delay = 5[s]  
 Recvr\_Gain = 50  
 Temp\_Get = 19.2[dC]  
 X\_90\_Width = 16[us]  
 X\_Acq\_Time = 1.24780544[s]  
 X\_Angle = 45[deg]  
 X\_Atn = 2.5[dB]  
 X\_Pulse = 8[us]  
 Irr\_Mode = Off  
 Tri\_Mode = Off  
 Dante\_Presat = FALSE  
 Initial\_Wait = 1[s]  
 Repetition\_Time = 6.24780544[s]

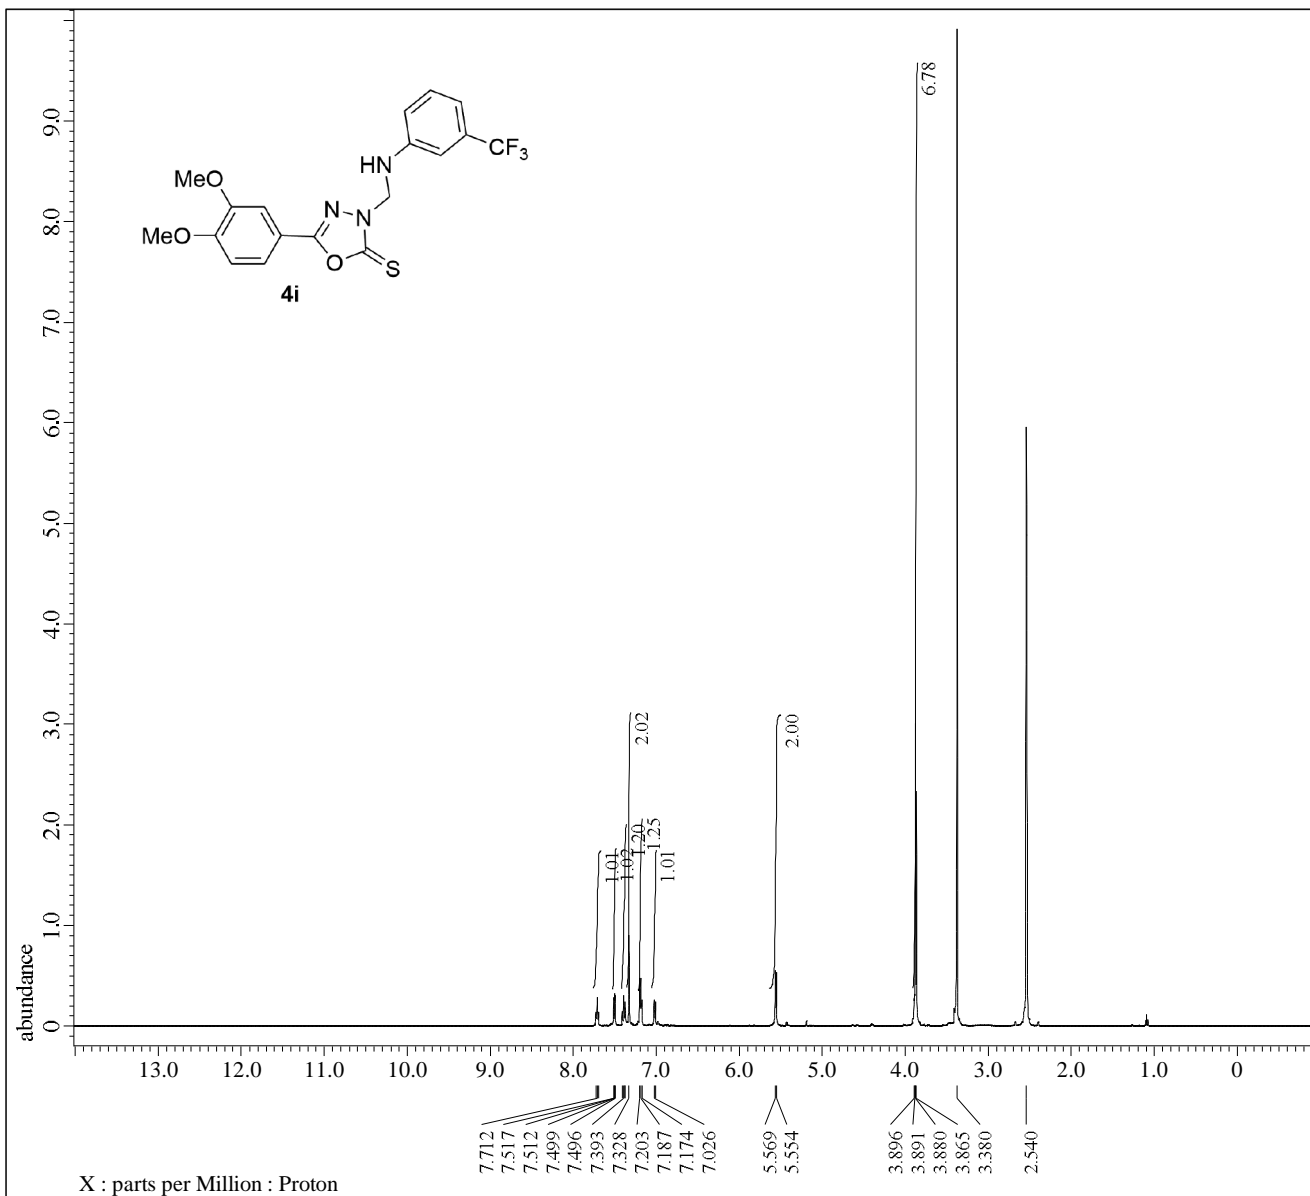

X : parts per Million : Proton

Filename = Prof.DR Ali Elemam\_DM\_13\_c  
 Author = delta  
 Experiment = carbon.jxp  
 Sample\_Id = Prof.DR Ali Elemam\_DM\_13  
 Solvent = DMSO-D6  
 Creation\_Time = 3-FEB-2021 20:42:59  
 Revision\_Time = 5-FEB-2021 04:40:24  
 Current\_Time = 5-FEB-2021 04:40:50

Comment = single pulse decoupled gat  
 Data\_Format = 1D COMPLEX  
 Dim\_Size = 26214  
 Dim\_Title = Carbon13  
 Dim\_Units = [ppm]  
 Dimensions = X  
 Site = JNM-ECA500II  
 Spectrometer = DELTA2\_NMR

Field\_Strength = 11.7473579[T] (500[MHz])  
 X\_Acq\_Duration = 0.83361792[s]  
 X\_Domain = 13C  
 X\_Freq = 125.76529768[MHz]  
 X\_Offset = 100[ppm]  
 X\_Points = 32768  
 X\_Prescans = 4  
 X\_Resolution = 1.19959034[Hz]  
 X\_Sweep = 39.3081761[kHz]  
 X\_Sweep\_Clipped = 31.44654088[kHz]  
 Irr\_Domain = Proton  
 Irr\_Freq = 500.15991521[MHz]  
 Irr\_Offset = 5.0[ppm]  
 Clipped = FALSE  
 Scans = 1850  
 Total\_Scans = 1850

Relaxation\_Delay = 2[s]  
 Recvr\_Gain = 60  
 Temp\_Get = 20.4[dC]  
 X\_90\_Width = 32.3[us]  
 X\_Acq\_Time = 0.83361792[s]  
 X\_Angle = 30[deg]  
 X\_Atn = 10[dB]  
 X\_Pulse = 10.76666667[us]  
 Irr\_Atn\_Dec = 17.693[dB]  
 Irr\_Atn\_NoE = 17.693[dB]  
 Irr\_Noise = WALTZ  
 Irr\_Pwidth = 92[us]  
 Decoupling = TRUE  
 Initial\_Wait = 1[s]  
 Noe = TRUE  
 Noe\_Time = 2[s]  
 Repetition\_Time = 2.83361792[s]

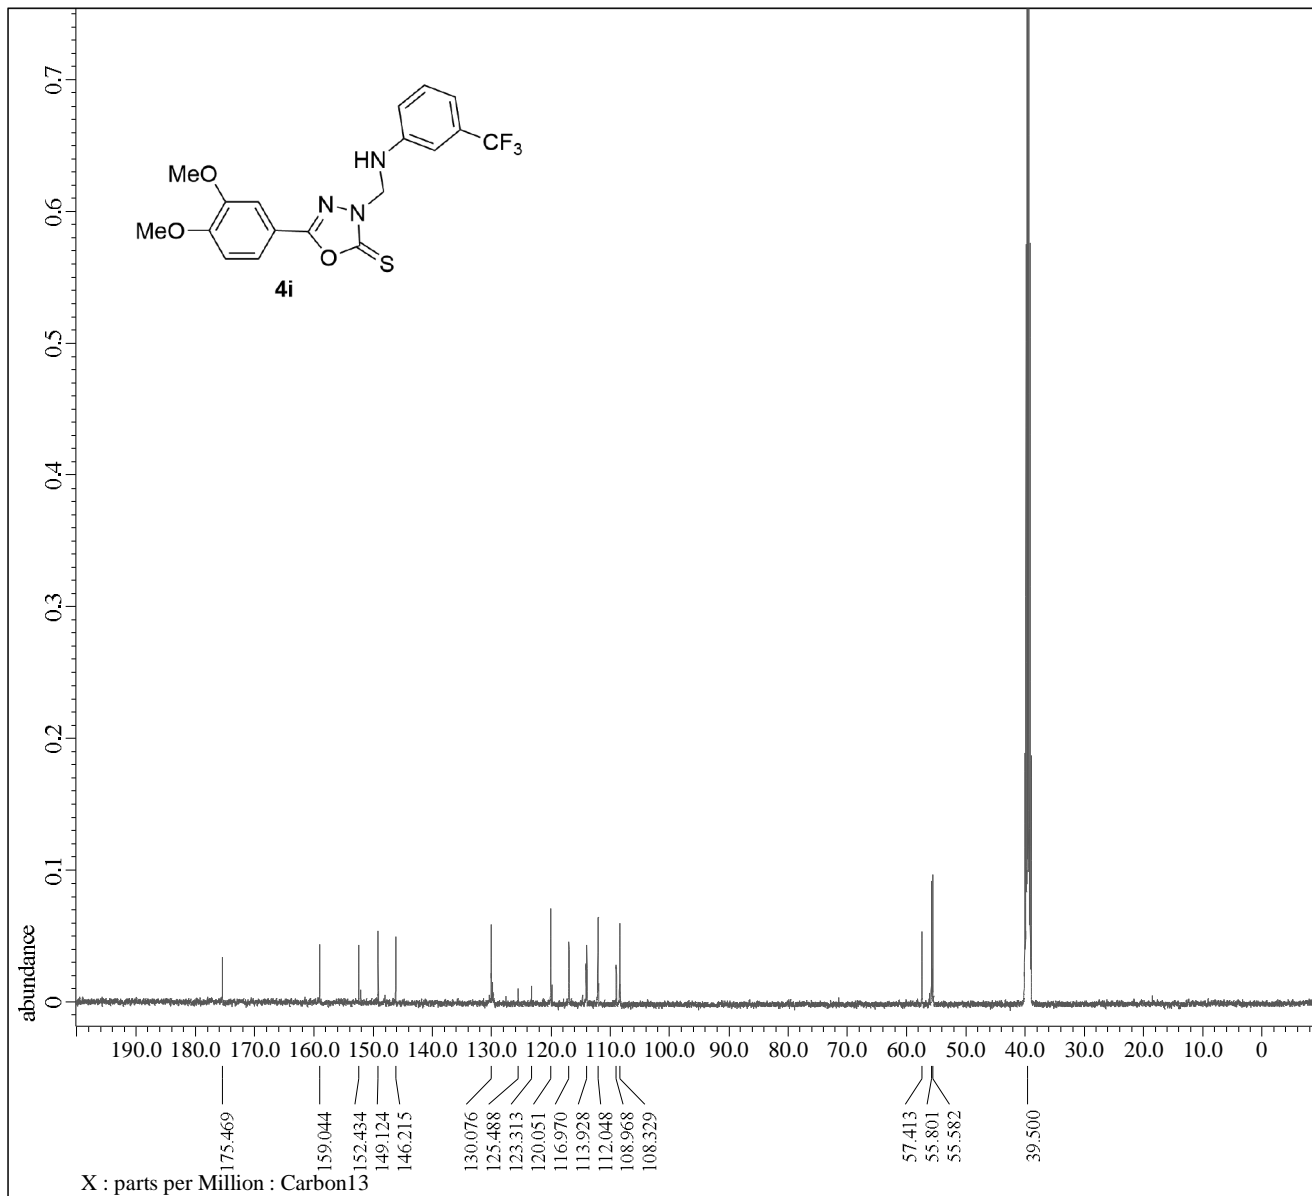

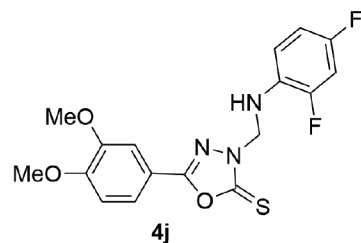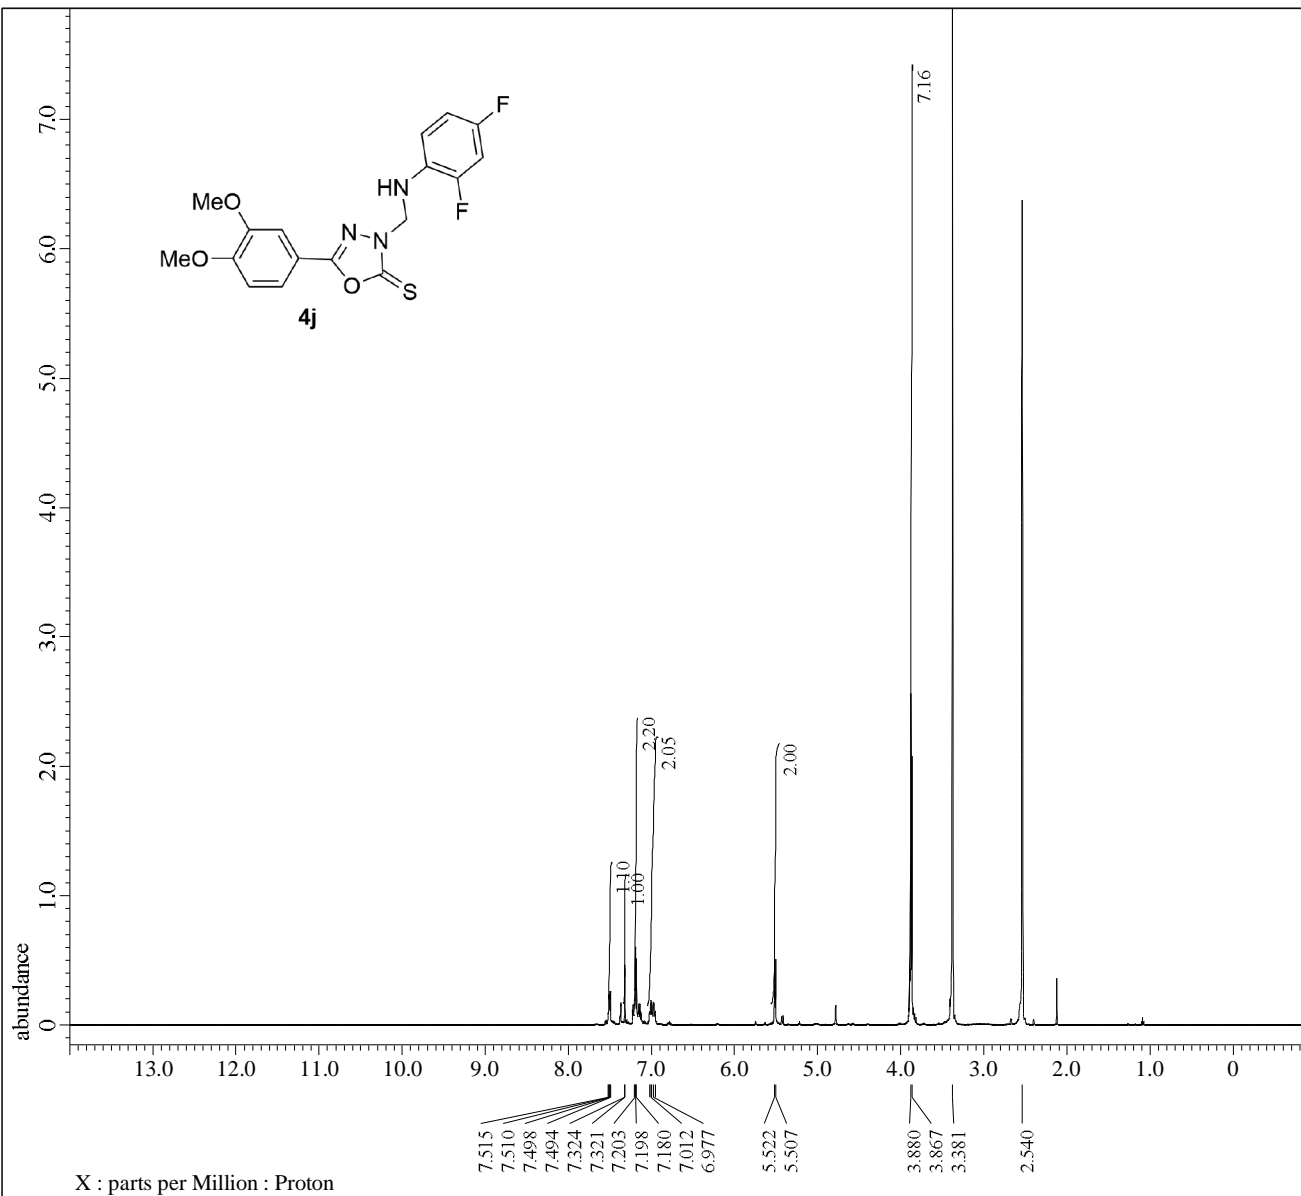

Filename = Prof.DR Ali Elemam\_DM\_15\_p  
 Author = delta  
 Experiment = proton.jxp  
 Sample\_Id = Prof.DR Ali Elemam\_DM\_15  
 Solvent = DMSO-D6  
 Creation\_Time = 30-DEC-2020 13:00:20  
 Revision\_Time = 6-FEB-2021 10:22:51  
 Current\_Time = 6-FEB-2021 10:24:11

Comment = single\_pulse  
 Data\_Format = 1D\_COMPLEX  
 Dim\_Size = 13107  
 Dim\_Title = Proton  
 Dim\_Units = [ppm]  
 Dimensions = X  
 Site = JNM-ECA500II  
 Spectrometer = DELTA2\_NMR

Field\_Strength = 11.7473579[T] (500[MHz])  
 X\_Acq\_Duration = 1.24780544[s]  
 X\_Domain = 1H  
 X\_Freq = 500.15991521[MHz]  
 X\_Offset = 7.0[ppm]  
 X\_Points = 16384  
 X\_Prescans = 1  
 X\_Resolution = 0.80140699[Hz]  
 X\_Sweep = 13.1302521[kHz]  
 X\_Sweep\_Clippped = 10.50420168[kHz]  
 Irr\_Domain = Proton  
 Irr\_Freq = 500.15991521[MHz]  
 Irr\_Offset = 5.0[ppm]  
 Tri\_Domain = Proton  
 Tri\_Freq = 500.15991521[MHz]  
 Tri\_Offset = 5.0[ppm]  
 Clipped = FALSE  
 Scans = 40  
 Total\_Scans = 40

Relaxation\_Delay = 5[s]  
 Recvr\_Gain = 50  
 Temp\_Get = 18.4[dC]  
 X\_90\_Width = 16[us]  
 X\_Acq\_Time = 1.24780544[s]  
 X\_Angle = 45[deg]  
 X\_Atn = 2.5[dB]  
 X\_Pulse = 8[us]  
 Irr\_Mode = Off  
 Tri\_Mode = Off  
 Dante\_Preset = FALSE  
 Initial\_Wait = 1[s]  
 Repetition\_Time = 6.24780544[s]

Filename = Prof.DR Ali Elemam\_DM\_15\_c  
 Author = delta  
 Experiment = carbon.jxp  
 Sample\_Id = Prof.DR Ali Elemam\_DM\_15  
 Solvent = DMSO-D6  
 Creation\_Time = 26-JAN-2021 01:54:58  
 Revision\_Time = 5-FEB-2021 05:09:19  
 Current\_Time = 5-FEB-2021 05:10:08

Comment = single pulse decoupled gat  
 Data\_Format = 1D COMPLEX  
 Dim\_Size = 26214  
 Dim\_Title = Carbon13  
 Dim\_Units = [ppm]  
 Dimensions = X  
 Site = JNM-ECA500II  
 Spectrometer = DELTA2\_NMR

Field\_Strength = 11.7473579[T] (500[MHz])  
 X\_Acq\_Duration = 0.83361792[s]  
 X\_Domain = 13C  
 X\_Freq = 125.76529768[MHz]  
 X\_Offset = 100[ppm]  
 X\_Points = 32768  
 X\_Prescans = 4  
 X\_Resolution = 1.19959034[Hz]  
 X\_Sweep = 39.3081761[kHz]  
 X\_Sweep\_Clippped = 31.44654088[kHz]  
 Irr\_Domain = Proton  
 Irr\_Freq = 500.15991521[MHz]  
 Irr\_Offset = 5.0[ppm]  
 Clipped = FALSE  
 Scans = 1024  
 Total\_Scans = 1024

Relaxation\_Delay = 2[s]  
 Recvr\_Gain = 58  
 Temp\_Get = 20.1[dC]  
 X\_90\_Width = 32.3[us]  
 X\_Acq\_Time = 0.83361792[s]  
 X\_Angle = 30[deg]  
 X\_Atn = 10[dB]  
 X\_Pulse = 10.76666667[us]  
 Irr\_Atn\_Dec = 17.693[dB]  
 Irr\_Atn\_Noie = 17.693[dB]  
 Irr\_Noise = WALTZ  
 Irr\_Pwidth = 92[us]  
 Decoupling = TRUE  
 Initial\_Wait = 1[s]  
 Noe = TRUE  
 Noe\_Time = 2[s]  
 Repetition\_Time = 2.83361792[s]

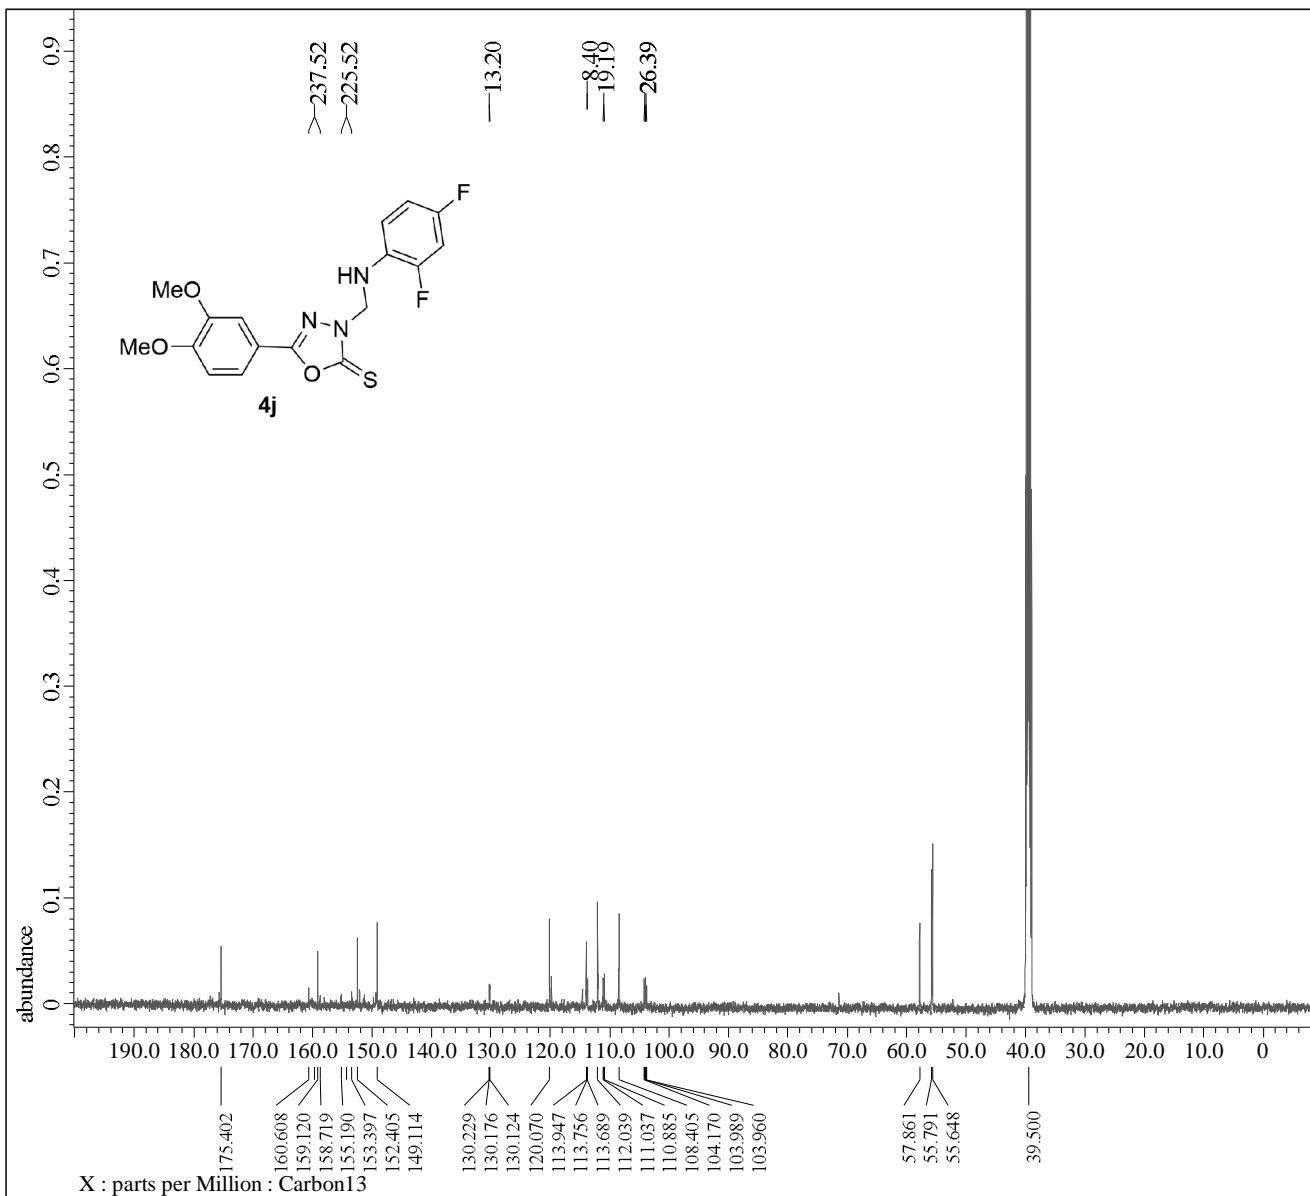





Filename = Prof.DR Ali Elemam\_DM\_16\_c  
 Author = delta  
 Experiment = carbon.jxp  
 Sample\_Id = Prof.DR Ali Elemam\_DM\_16  
 Solvent = DMSO-D6  
 Creation\_Time = 26-JAN-2021 02:51:44  
 Revision\_Time = 5-FEB-2021 05:52:07  
 Current\_Time = 5-FEB-2021 05:53:46

Comment = single pulse decoupled gat  
 Data\_Format = 1D COMPLEX  
 Dim\_Size = 26214  
 Dim\_Title = Carbon13  
 Dim\_Units = [ppm]  
 Dimensions = X  
 Site = JNM-ECA500II  
 Spectrometer = DELTA2\_NMR

Field\_Strength = 11.7473579[T] (500[MHz])  
 X\_Acq\_Duration = 0.83361792[s]  
 X\_Domain = 13C  
 X\_Freq = 125.76529768[MHz]  
 X\_Offset = 100[ppm]  
 X\_Points = 32768  
 X\_Prescans = 4  
 X\_Resolution = 1.19959034[Hz]  
 X\_Sweep = 39.3081761[kHz]  
 X\_Sweep\_Clippped = 31.44654088[kHz]  
 Irr\_Domain = Proton  
 Irr\_Freq = 500.15991521[MHz]  
 Irr\_Offset = 5.0[ppm]  
 Clipped = FALSE  
 Scans = 1024  
 Total\_Scans = 1024

Relaxation\_Delay = 2[s]  
 Recvr\_Gain = 60  
 Temp\_Get = 20[dc]  
 X\_90\_Width = 32.3[us]  
 X\_Acq\_Time = 0.83361792[s]  
 X\_Angle = 30[deg]  
 X\_Atn = 10[db]  
 X\_Pulse = 10.76666667[us]  
 Irr\_Atn\_Dec = 17.693[db]  
 Irr\_Atn\_Noie = 17.693[db]  
 Irr\_Noise = WALTZ  
 Irr\_Pwidth = 92[us]  
 Decoupling = TRUE  
 Initial\_Wait = 1[s]  
 Noe = TRUE  
 Noe\_Time = 2[s]  
 Repetition\_Time = 2.83361792[s]

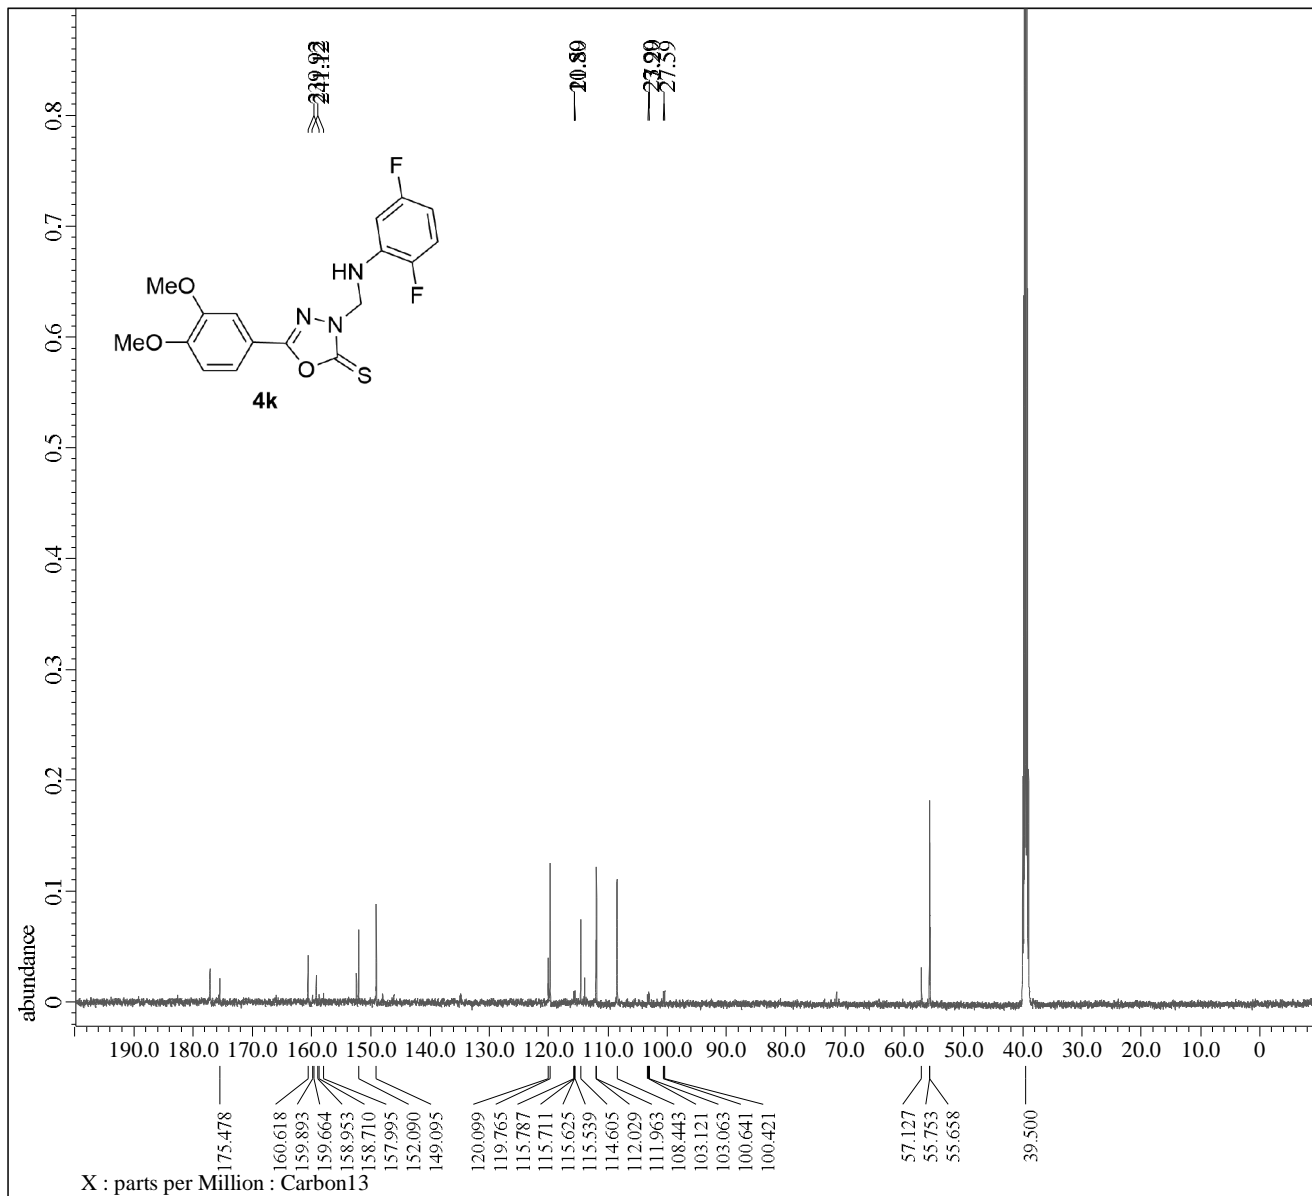

X : parts per Million : Carbon13

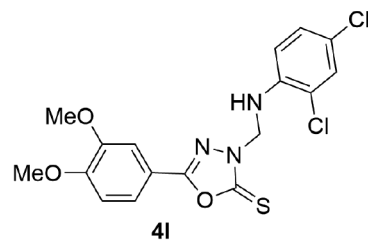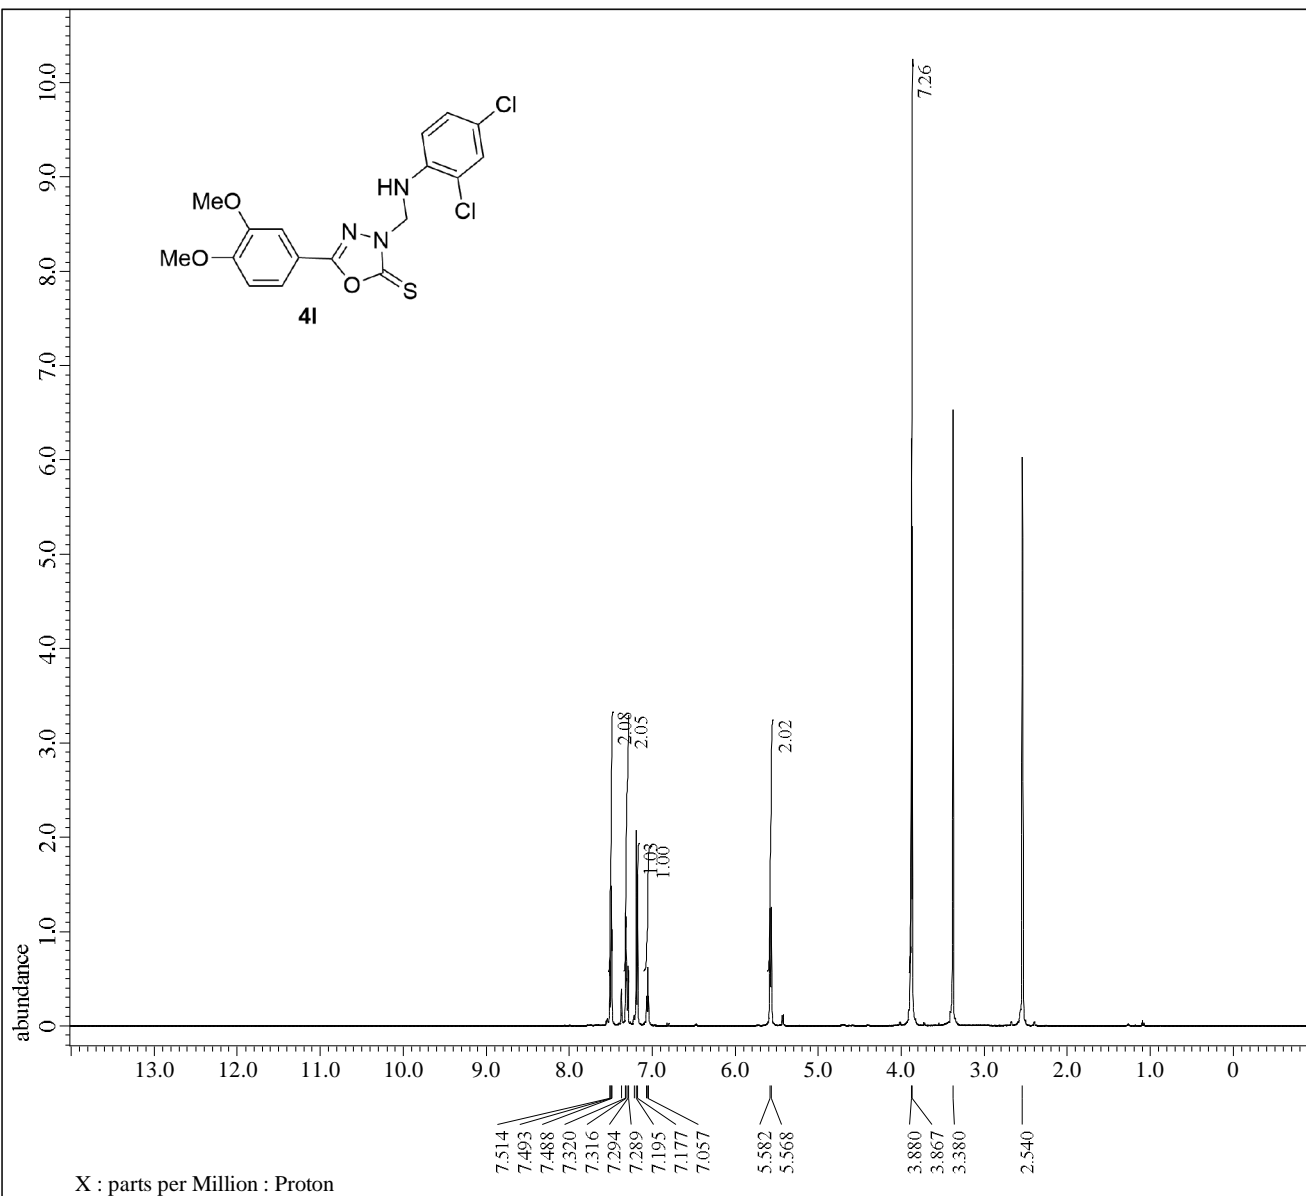

Filename = Prof.DR Ali Elemam\_DM\_14\_p  
 Author = delta  
 Experiment = proton.jxp  
 Sample\_Id = Prof.DR Ali Elemam\_DM\_14  
 Solvent = DMSO-D6  
 Creation\_Time = 30-DEC-2020 14:40:18  
 Revision\_Time = 6-FEB-2021 10:07:38  
 Current\_Time = 6-FEB-2021 10:08:05

Comment = single\_pulse  
 Data\_Format = 1D\_COMPLEX  
 Dim\_Size = 13107  
 Dim\_Title = Proton  
 Dim\_Units = [ppm]  
 Dimensions = X  
 Site = JNM-ECA500II  
 Spectrometer = DELTA2\_NMR

Field\_Strength = 11.7473579[T] (500[MHz])  
 X\_Acq\_Duration = 1.24780544[s]  
 X\_Domain = 1H  
 X\_Freq = 500.15991521[MHz]  
 X\_Offset = 7.0[ppm]  
 X\_Points = 16384  
 X\_Prescans = 1  
 X\_Resolution = 0.80140699[Hz]  
 X\_Sweep = 13.1302521[kHz]  
 X\_Sweep\_Clipped = 10.50420168[kHz]  
 Irr\_Domain = Proton  
 Irr\_Freq = 500.15991521[MHz]  
 Irr\_Offset = 5.0[ppm]  
 Tri\_Domain = Proton  
 Tri\_Freq = 500.15991521[MHz]  
 Tri\_Offset = 5.0[ppm]  
 Clipped = FALSE  
 Scans = 40  
 Total\_Scans = 40

Relaxation\_Delay = 5[s]  
 Recvr\_Gain = 50  
 Temp\_Get = 18.8[dC]  
 X\_90\_Width = 16[us]  
 X\_Acq\_Time = 1.24780544[s]  
 X\_Angle = 45[deg]  
 X\_Atn = 2.5[dB]  
 X\_Pulse = 8[us]  
 Irr\_Mode = Off  
 Tri\_Mode = Off  
 Dante\_Preset = FALSE  
 Initial\_Wait = 1[s]  
 Repetition\_Time = 6.24780544[s]

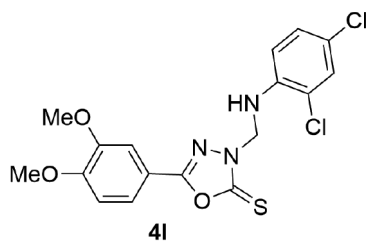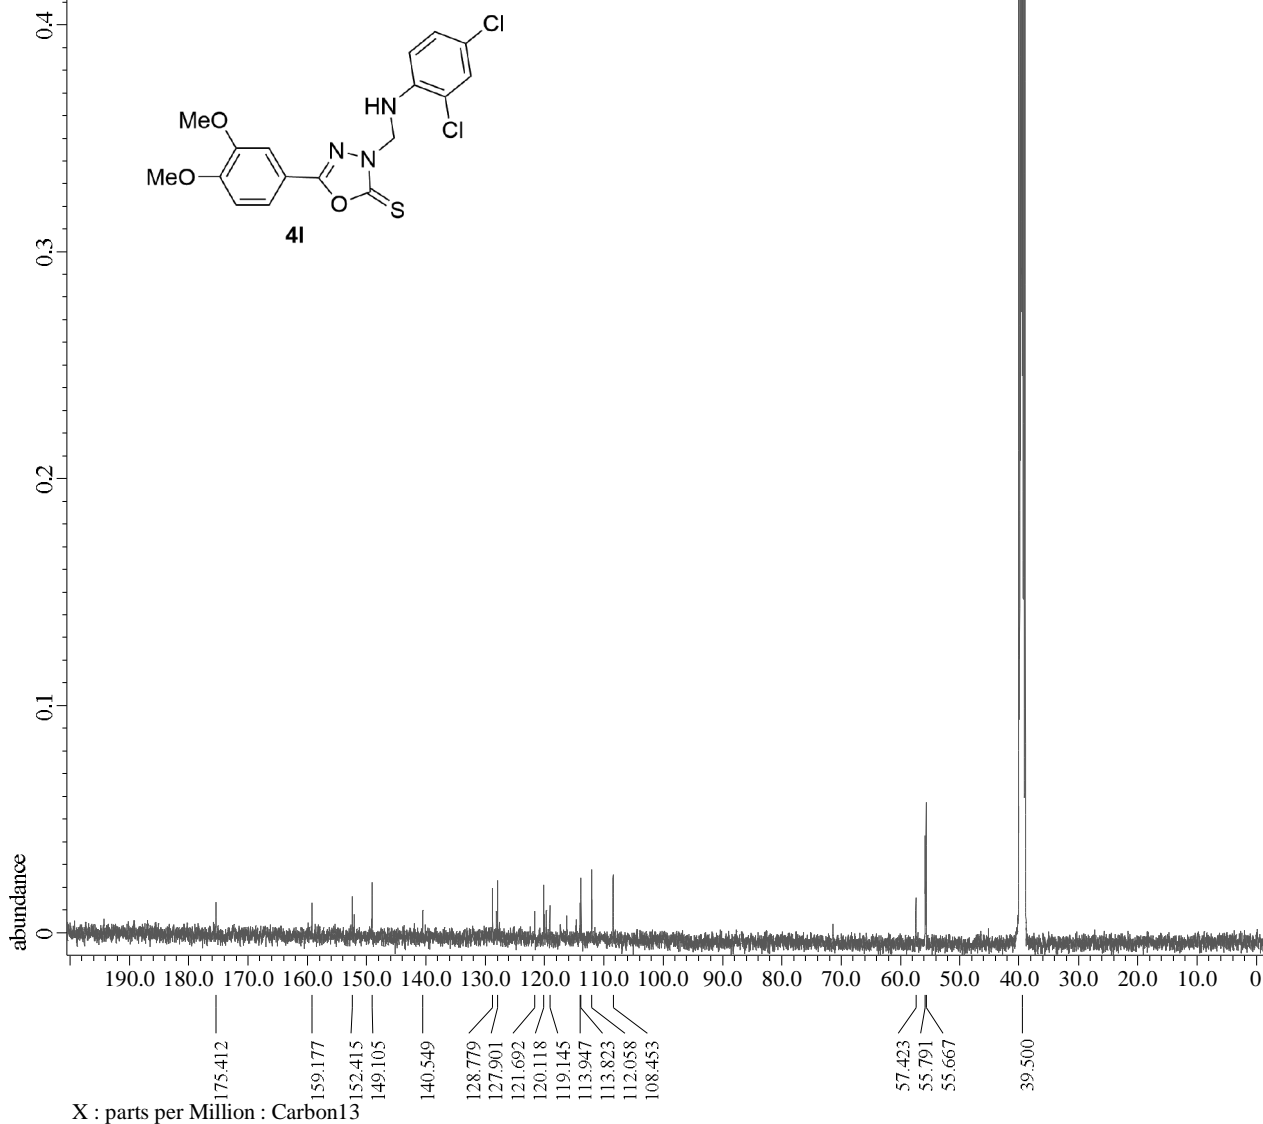

Filename = Prof.DR Ali Elemam\_DM\_14\_c  
 Author = delta  
 Experiment = carbon.jxp  
 Sample\_Id = Prof.DR Ali Elemam\_DM\_14  
 Solvent = DMSO-D6  
 Creation\_Time = 3-FEB-2021 22:18:44  
 Revision\_Time = 5-FEB-2021 04:46:58  
 Current\_Time = 5-FEB-2021 04:48:17

Comment = single pulse decoupled gat  
 Data\_Format = 1D COMPLEX  
 Dim\_Size = 26214  
 Dim\_Title = Carbon13  
 Dim\_Units = [ppm]  
 Dimensions = X  
 Site = JNM-ECA500II  
 Spectrometer = DELTA2\_NMR

Field\_Strength = 11.7473579[T] (500[MHz])  
 X\_Acq\_Duration = 0.83361792[s]  
 X\_Domain = 13C  
 X\_Freq = 125.76529768[MHz]  
 X\_Offset = 100[ppm]  
 X\_Points = 32768  
 X\_Prescans = 4  
 X\_Resolution = 1.19959034[Hz]  
 X\_Sweep = 39.3081761[kHz]  
 X\_Sweep\_Clippped = 31.44654088[kHz]  
 Irr\_Domain = Proton  
 Irr\_Freq = 500.15991521[MHz]  
 Irr\_Offset = 5.0[ppm]  
 Clipped = FALSE  
 Scans = 1850  
 Total\_Scans = 1850

Relaxation\_Delay = 2[s]  
 Recvr\_Gain = 58  
 Temp\_Get = 19.8[dC]  
 X\_90\_Width = 32.3[us]  
 X\_Acq\_Time = 0.83361792[s]  
 X\_Angle = 30[deg]  
 X\_Atn = 10[dB]  
 X\_Pulse = 10.76666667[us]  
 Irr\_Atn\_Dec = 17.693[dB]  
 Irr\_Atn\_Noe = 17.693[dB]  
 Irr\_Noise = WALTZ  
 Irr\_Pwidth = 92[us]  
 Decoupling = TRUE  
 Initial\_Wait = 1[s]  
 Noe = TRUE  
 Noe\_Time = 2[s]  
 Repetition\_Time = 2.83361792[s]

Filename = Prof.DR Ali Elemam\_DM\_1\_pr  
 Author = delta  
 Experiment = proton.jxp  
 Sample\_Id = Prof.DR Ali Elemam\_DM\_1  
 Solvent = DMSO-D6  
 Creation\_Time = 14-DEC-2020 11:41:11  
 Revision\_Time = 5-FEB-2021 23:12:44  
 Current\_Time = 5-FEB-2021 23:13:51

Comment = single\_pulse  
 Data\_Format = 1D COMPLEX  
 Dim\_Size = 13107  
 Dim\_Title = Proton  
 Dim\_Units = [ppm]  
 Dimensions = X  
 Site = JNM-ECA500II  
 Spectrometer = DELTA2\_NMR

Field\_Strength = 11.7473579[T] (500[MHz])  
 X\_Acq\_Duration = 1.24780544[s]  
 X\_Domain = 1H  
 X\_Freq = 500.15991521[MHz]  
 X\_Offset = 7.0[ppm]  
 X\_Points = 16384  
 X\_Prescans = 1  
 X\_Resolution = 0.80140699[Hz]  
 X\_Sweep = 13.1302521[kHz]  
 X\_Sweep\_Clipped = 10.50420168[kHz]  
 Irr\_Domain = Proton  
 Irr\_Freq = 500.15991521[MHz]  
 Irr\_Offset = 5.0[ppm]  
 Tri\_Domain = Proton  
 Tri\_Freq = 500.15991521[MHz]  
 Tri\_Offset = 5.0[ppm]  
 Clipped = FALSE  
 Scans = 40  
 Total\_Scans = 40

Relaxation\_Delay = 5[s]  
 Recvr\_Gain = 50  
 Temp\_Get = 18.9[dC]  
 X\_90\_Width = 16[us]  
 X\_Acq\_Time = 1.24780544[s]  
 X\_Angle = 45[deg]  
 X\_Atn = 2.5[dB]  
 X\_Pulse = 8[us]  
 Irr\_Mode = Off  
 Tri\_Mode = Off  
 Dante\_Preset = FALSE  
 Initial\_Wait = 1[s]  
 Repetition\_Time = 6.24780544[s]

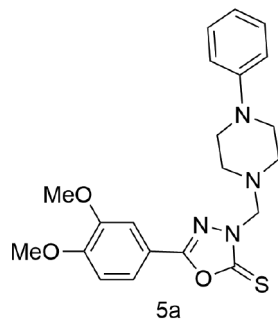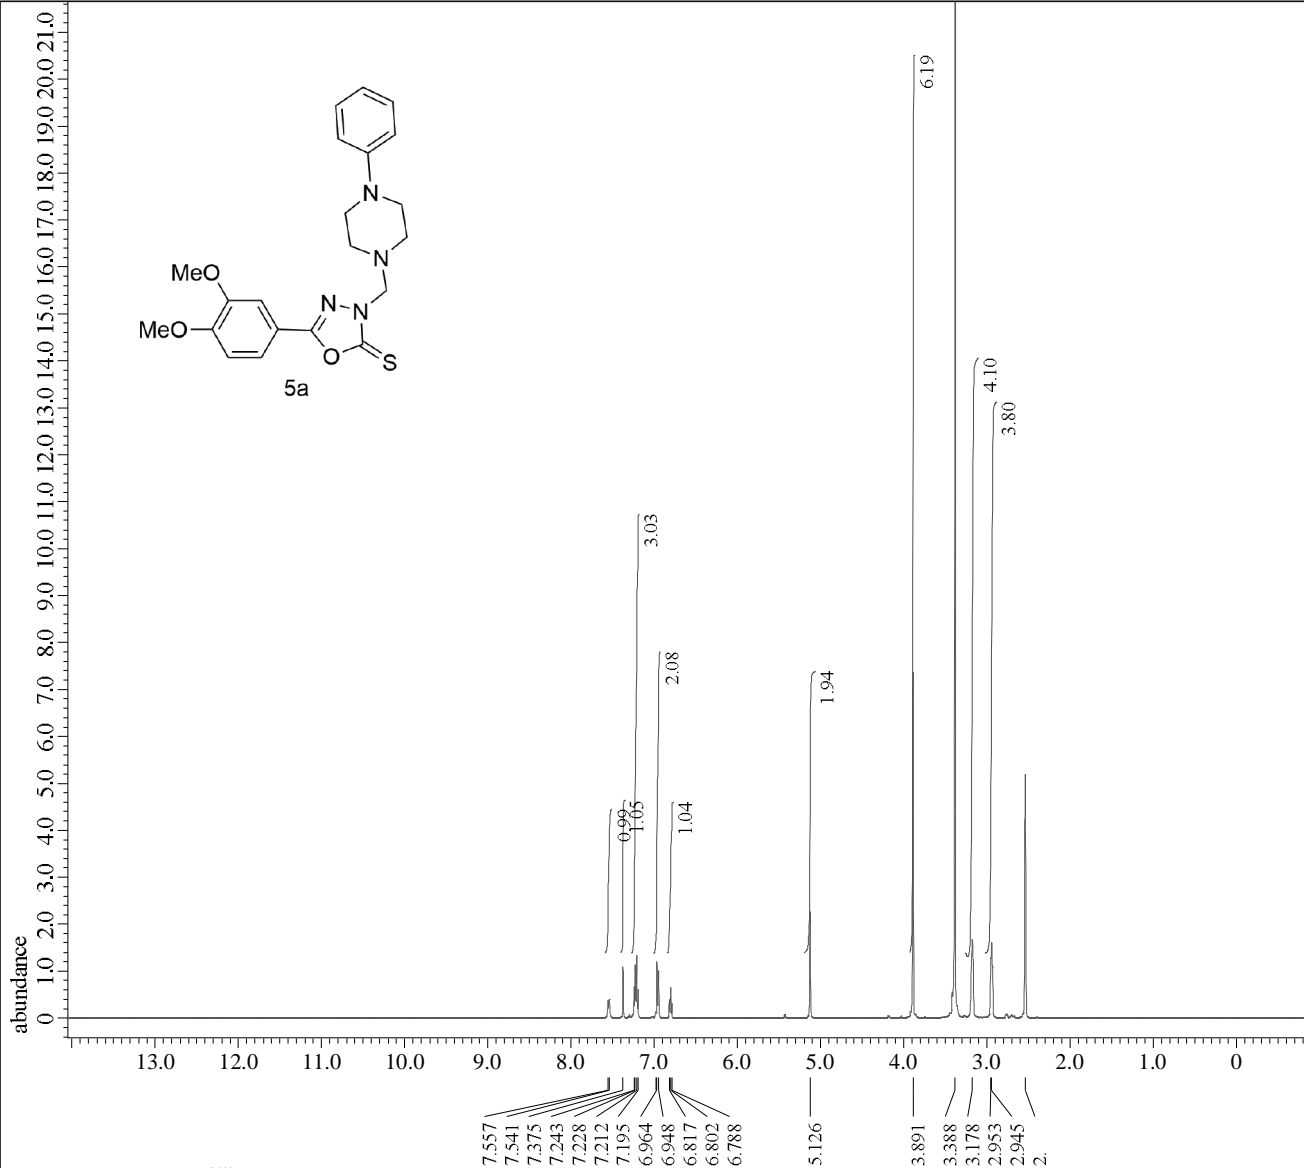

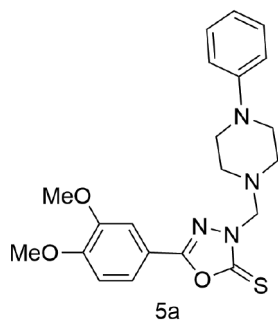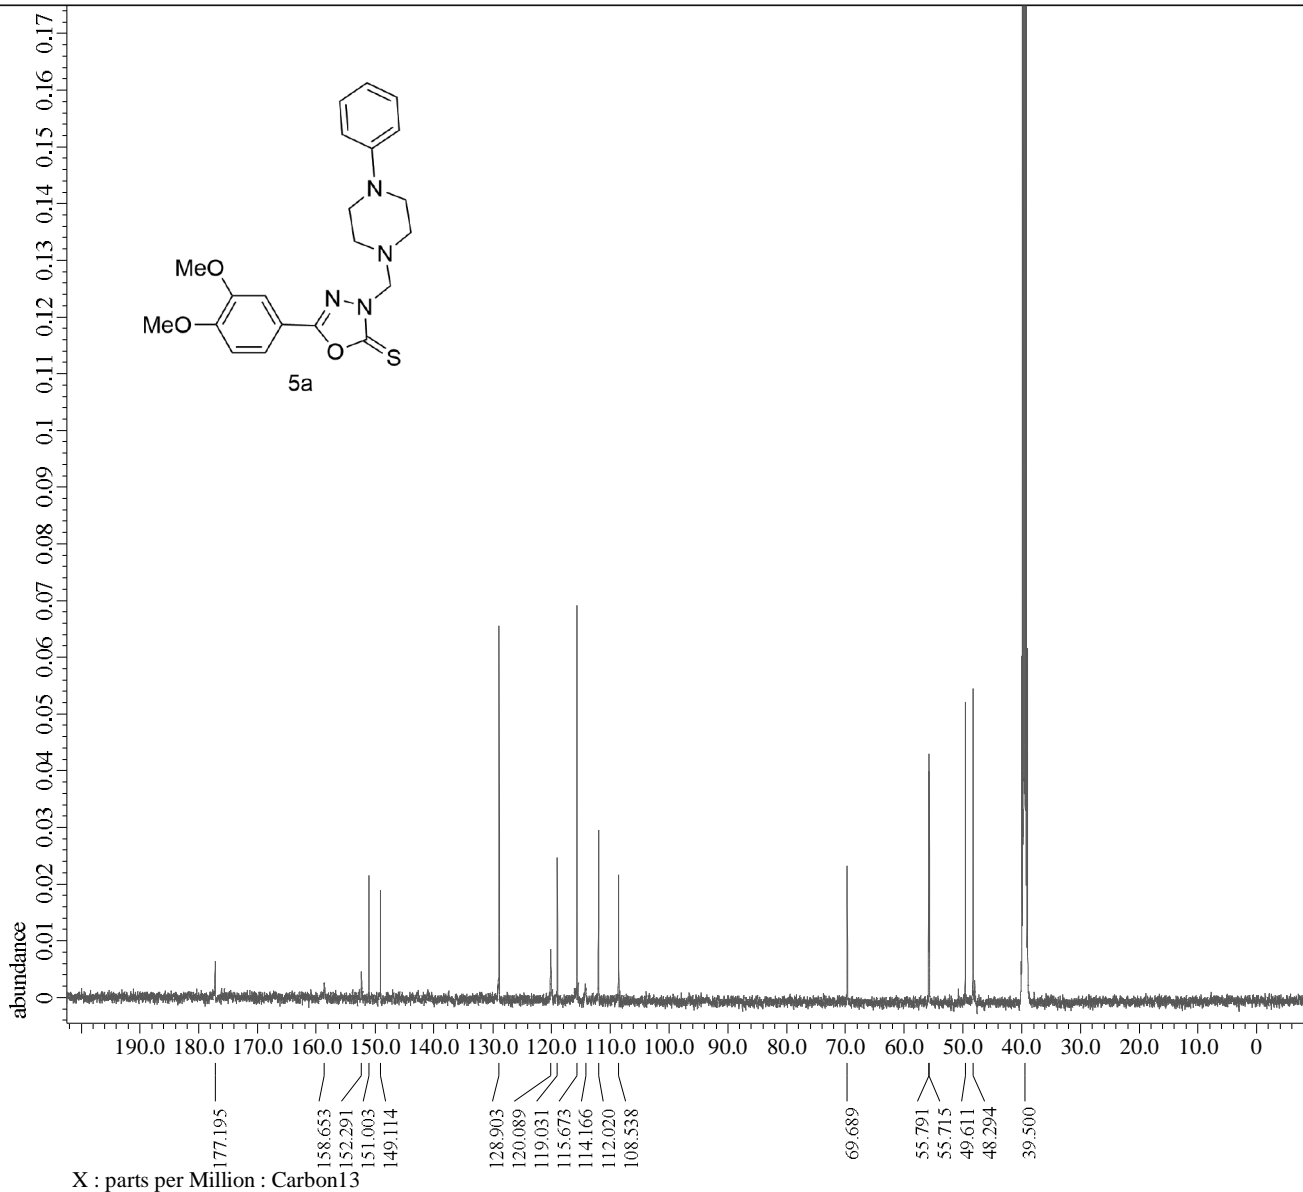

Filename = Prof.DR Ali Elemam\_DM\_1\_ca  
 Author = delta  
 Experiment = carbon.jxp  
 Sample\_Id = Prof.DR Ali Elemam\_DM\_1  
 Solvent = DMSO-D6  
 Creation\_Time = 21-DEC-2020 19:28:08  
 Revision\_Time = 5-FEB-2021 08:35:11  
 Current\_Time = 5-FEB-2021 08:36:32

Comment = single pulse decoupled gat  
 Data\_Format = 1D COMPLEX  
 Dim\_Size = 26214  
 Dim\_Title = Carbon13  
 Dim\_Units = [ppm]  
 Dimensions = X  
 Site = JNM-ECA500II  
 Spectrometer = DELTA2\_NMR

Field\_Strength = 11.7473579[T] (500[MHz])  
 X\_Acq\_Duration = 0.83361792[s]  
 X\_Domain = 13C  
 X\_Freq = 125.76529768[MHz]  
 X\_Offset = 100[ppm]  
 X\_Points = 32768  
 X\_Prescans = 4  
 X\_Resolution = 1.19959034[Hz]  
 X\_Sweep = 39.3081761[kHz]  
 X\_Sweep\_Clippped = 31.44654088[kHz]  
 Irr\_Domain = Proton  
 Irr\_Freq = 500.15991521[MHz]  
 Irr\_Offset = 5.0[ppm]  
 Clipped = FALSE  
 Scans = 1500  
 Total\_Scans = 1500

Relaxation\_Delay = 2[s]  
 Recvr\_Gain = 50  
 Temp\_Get = 20.3[dC]  
 X\_90\_Width = 32.3[us]  
 X\_Acq\_Time = 0.83361792[s]  
 X\_Angle = 30[deg]  
 X\_Atn = 10[dB]  
 X\_Pulse = 10.76666667[us]  
 Irr\_Atn\_Dec = 17.693[dB]  
 Irr\_Atn\_Noie = 17.693[dB]  
 Irr\_Noise = WALTZ  
 Irr\_Pwidth = 92[us]  
 Decoupling = TRUE  
 Initial\_Wait = 1[s]  
 Noe = TRUE  
 Noe\_Time = 2[s]  
 Repetition\_Time = 2.83361792[s]

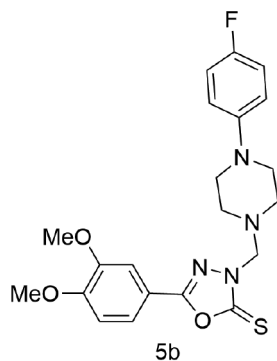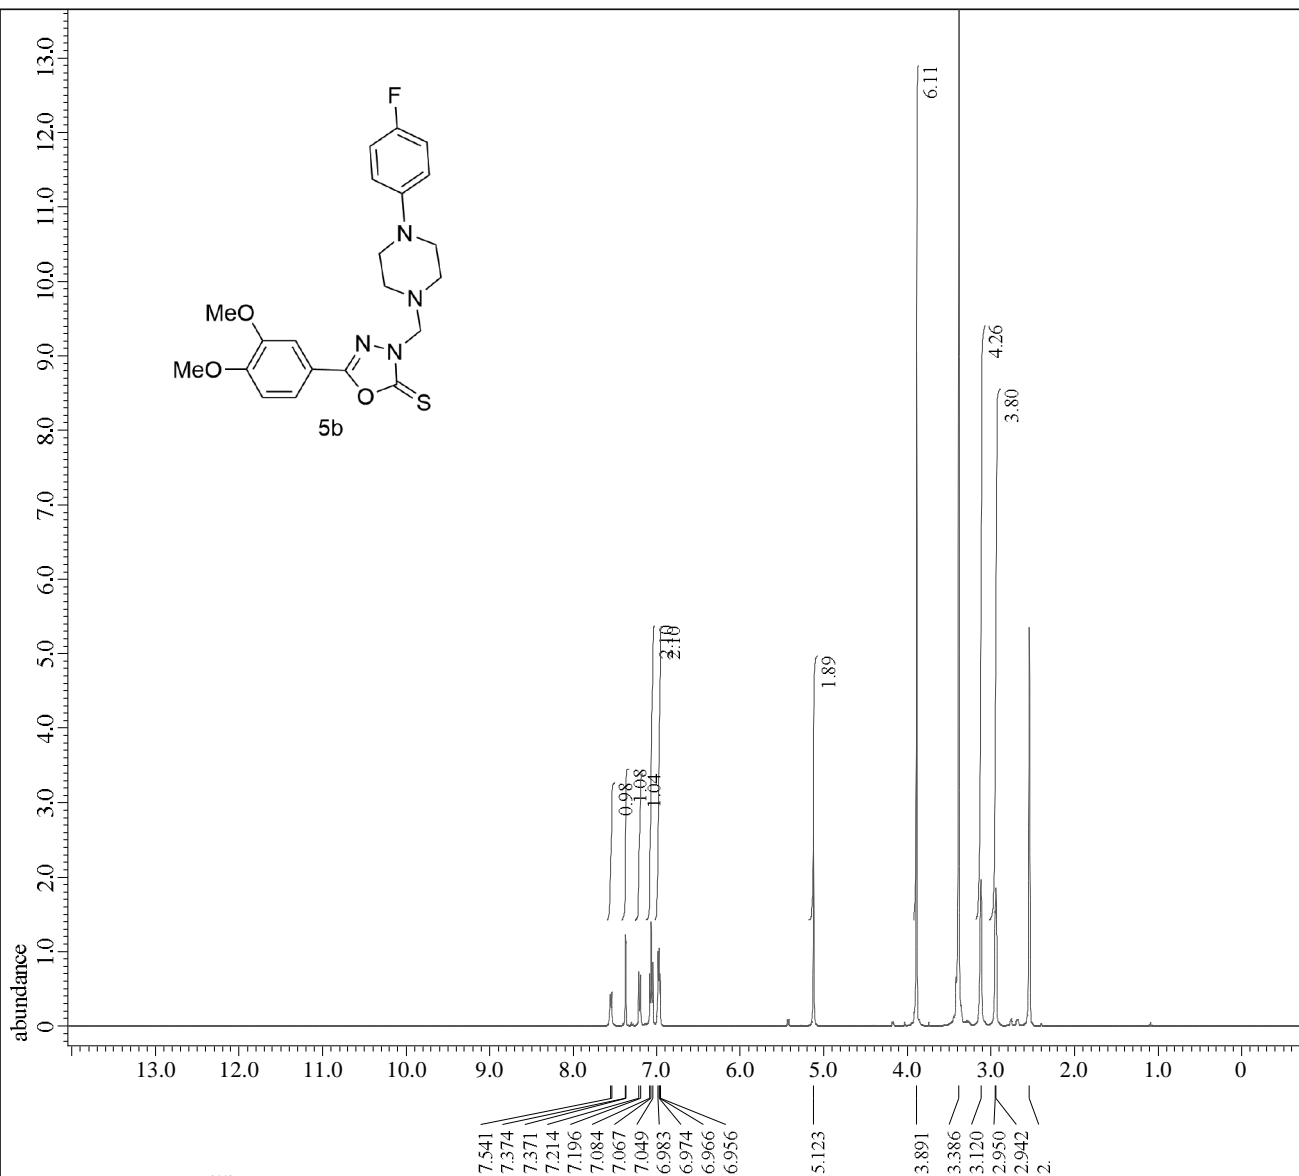

Filename = Prof.DR Ali Elemam\_DM\_2\_pr  
 Author = delta  
 Experiment = proton.jxp  
 Sample\_Id = Prof.DR Ali Elemam\_DM\_2  
 Solvent = DMSO-D6  
 Creation\_Time = 14-DEC-2020 11:50:57  
 Revision\_Time = 5-FEB-2021 23:19:09  
 Current\_Time = 5-FEB-2021 23:19:16

Comment = single\_pulse  
 Data\_Format = 1D COMPLEX  
 Dim\_Size = 13107  
 Dim\_Title = Proton  
 Dim\_Units = [ppm]  
 Dimensions = X  
 Site = JNM-ECA500II  
 Spectrometer = DELTA2\_NMR

Field\_Strength = 11.7473579[T] (500[MHz])  
 X\_Acq\_Duration = 1.24780544[s]  
 X\_Domain = 1H  
 X\_Freq = 500.15991521[MHz]  
 X\_Offset = 7.0[ppm]  
 X\_Points = 16384  
 X\_Prescans = 1  
 X\_Resolution = 0.80140699[Hz]  
 X\_Sweep = 13.1302521[kHz]  
 X\_Sweep\_Clippped = 10.50420168[kHz]  
 Irr\_Domain = Proton  
 Irr\_Freq = 500.15991521[MHz]  
 Irr\_Offset = 5.0[ppm]  
 Tri\_Domain = Proton  
 Tri\_Freq = 500.15991521[MHz]  
 Tri\_Offset = 5.0[ppm]  
 Clipped = FALSE  
 Scans = 40  
 Total\_Scans = 40

Relaxation\_Delay = 5[s]  
 Recvr\_Gain = 50  
 Temp\_Get = 19[dc]  
 X\_90\_Width = 16[us]  
 X\_Acq\_Time = 1.24780544[s]  
 X\_Angle = 45[deg]  
 X\_Atn = 2.5[dB]  
 X\_Pulse = 8[us]  
 Irr\_Mode = Off  
 Tri\_Mode = Off  
 Dante\_Preset = FALSE  
 Initial\_Wait = 1[s]  
 Repetition\_Time = 6.24780544[s]

Filename = Prof.DR Ali Elemam\_DM\_2\_ca  
 Author = delta  
 Experiment = carbon.jxp  
 Sample\_Id = Prof.DR Ali Elemam\_DM\_2  
 Solvent = DMSO-D6  
 Creation\_Time = 21-DEC-2020 20:44:41  
 Revision\_Time = 5-FEB-2021 08:45:38  
 Current\_Time = 5-FEB-2021 08:49:17

Comment = single pulse decoupled gat  
 Data\_Format = 1D COMPLEX  
 Dim\_Size = 26214  
 Dim\_Title = Carbon13  
 Dim\_Units = [ppm]  
 Dimensions = X  
 Site = JNM-ECA500II  
 Spectrometer = DELTA2\_NMR

Field\_Strength = 11.7473579[T] (500[MHz])  
 X\_Acq\_Duration = 0.83361792[s]  
 X\_Domain = 13C  
 X\_Freq = 125.76529768[MHz]  
 X\_Offset = 100[ppm]  
 X\_Points = 32768  
 X\_Prescans = 4  
 X\_Resolution = 1.19959034[Hz]  
 X\_Sweep = 39.3081761[kHz]  
 X\_Sweep\_Clipped = 31.44654088[kHz]  
 Irr\_Domain = Proton  
 Irr\_Freq = 500.15991521[MHz]  
 Irr\_Offset = 5.0[ppm]  
 Clipped = FALSE  
 Scans = 1500  
 Total\_Scans = 1500

Relaxation\_Delay = 2[s]  
 Recvr\_Gain = 50  
 Temp\_Get = 19.9[dC]  
 X\_90\_Width = 32.3[us]  
 X\_Acq\_Time = 0.83361792[s]  
 X\_Angle = 30[deg]  
 X\_Atn = 10[dB]  
 X\_Pulse = 10.76666667[us]  
 Irr\_Atn\_Dec = 17.693[dB]  
 Irr\_Atn\_Noe = 17.693[dB]  
 Irr\_Noise = WALTZ  
 Irr\_Pwidth = 92[us]  
 Decoupling = TRUE  
 Initial\_Wait = 1[s]  
 Noe = TRUE  
 Noe\_Time = 2[s]  
 Repetition\_Time = 2.83361792[s]

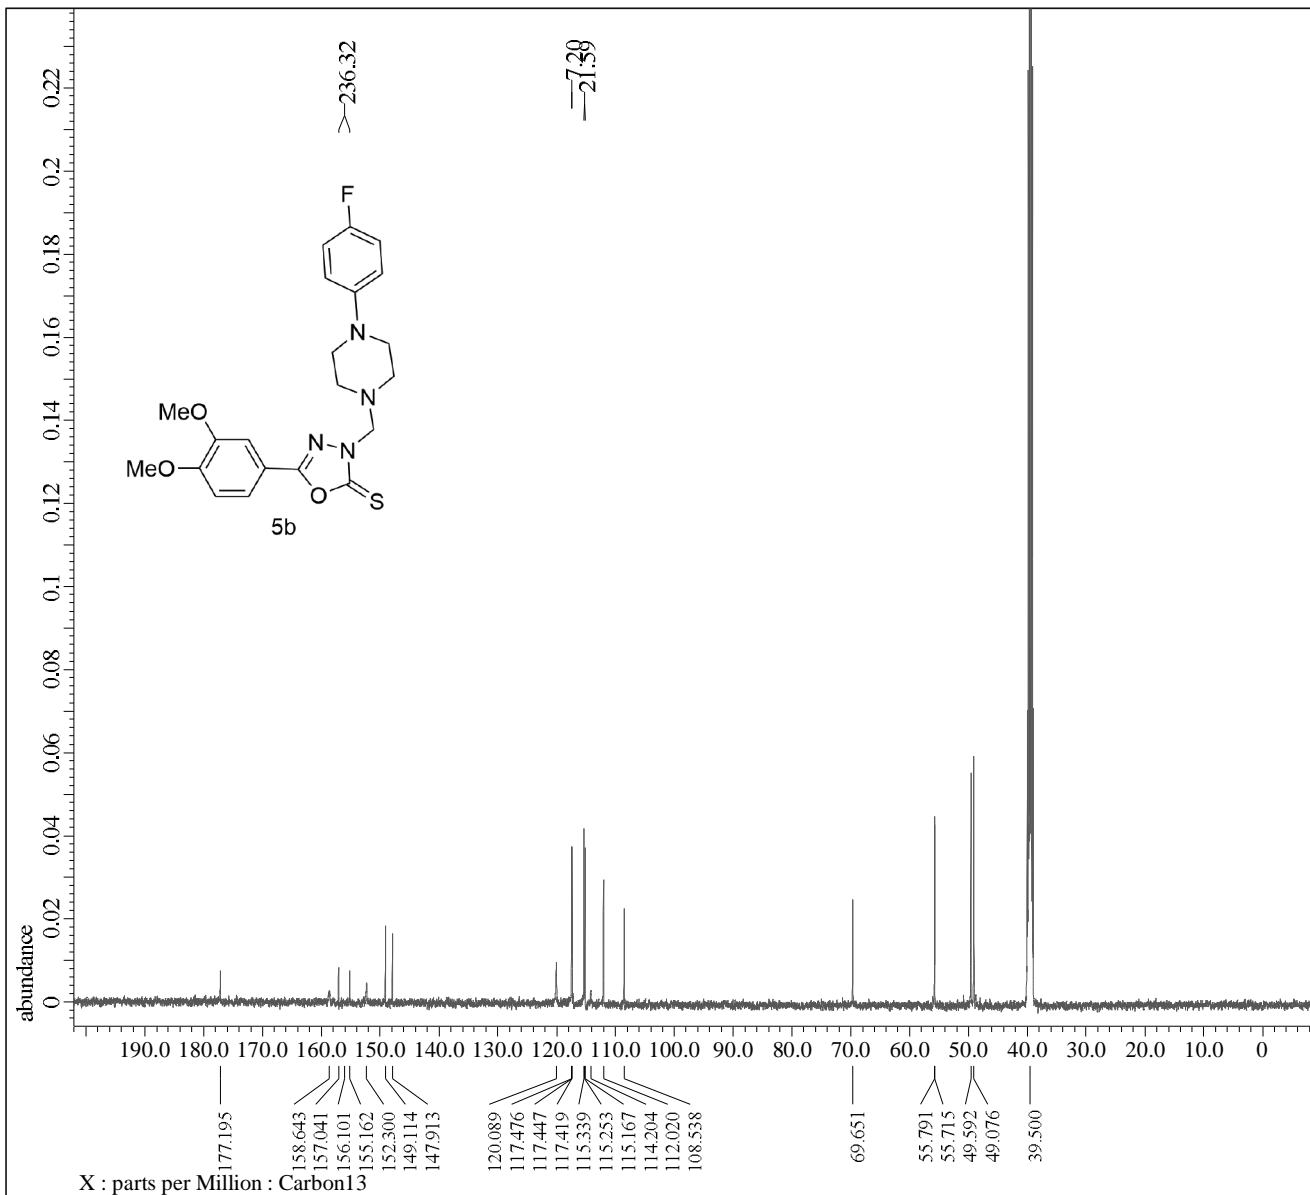

Filename = Prof.DR Ali Elemam\_DM\_3\_pr  
 Author = delta  
 Experiment = proton.jxp  
 Sample\_Id = Prof.DR Ali Elemam\_DM\_3  
 Solvent = DMSO-D6  
 Creation\_Time = 14-DEC-2020 12:02:59  
 Revision\_Time = 5-FEB-2021 23:22:48  
 Current\_Time = 5-FEB-2021 23:23:09

Comment = single\_pulse  
 Data\_Format = 1D COMPLEX  
 Dim\_Size = 13107  
 Dim\_Title = Proton  
 Dim\_Units = [ppm]  
 Dimensions = X  
 Site = JNM-ECA500II  
 Spectrometer = DELTA2\_NMR

Field\_Strength = 11.7473579[T] (500[MHz])  
 X\_Acq\_Duration = 1.24780544[s]  
 X\_Domain = 1H  
 X\_Freq = 500.15991521[MHz]  
 X\_Offset = 7.0[ppm]  
 X\_Points = 16384  
 X\_Prescans = 1  
 X\_Resolution = 0.80140699[Hz]  
 X\_Sweep = 13.1302521[kHz]  
 X\_Sweep\_Clippped = 10.50420168[kHz]  
 Irr\_Domain = Proton  
 Irr\_Freq = 500.15991521[MHz]  
 Irr\_Offset = 5.0[ppm]  
 Tri\_Domain = Proton  
 Tri\_Freq = 500.15991521[MHz]  
 Tri\_Offset = 5.0[ppm]  
 Clipped = TRUE  
 Scans = 40  
 Total\_Scans = 40

Relaxation\_Delay = 5[s]  
 Recvr\_Gain = 50  
 Temp\_Get = 18.7[dC]  
 X\_90\_Width = 16[us]  
 X\_Acq\_Time = 1.24780544[s]  
 X\_Angle = 45[deg]  
 X\_Atn = 2.5[dB]  
 X\_Pulse = 8[us]  
 Irr\_Mode = Off  
 Tri\_Mode = Off  
 Dante\_Preset = FALSE  
 Initial\_Wait = 1[s]  
 Repetition\_Time = 6.24780544[s]

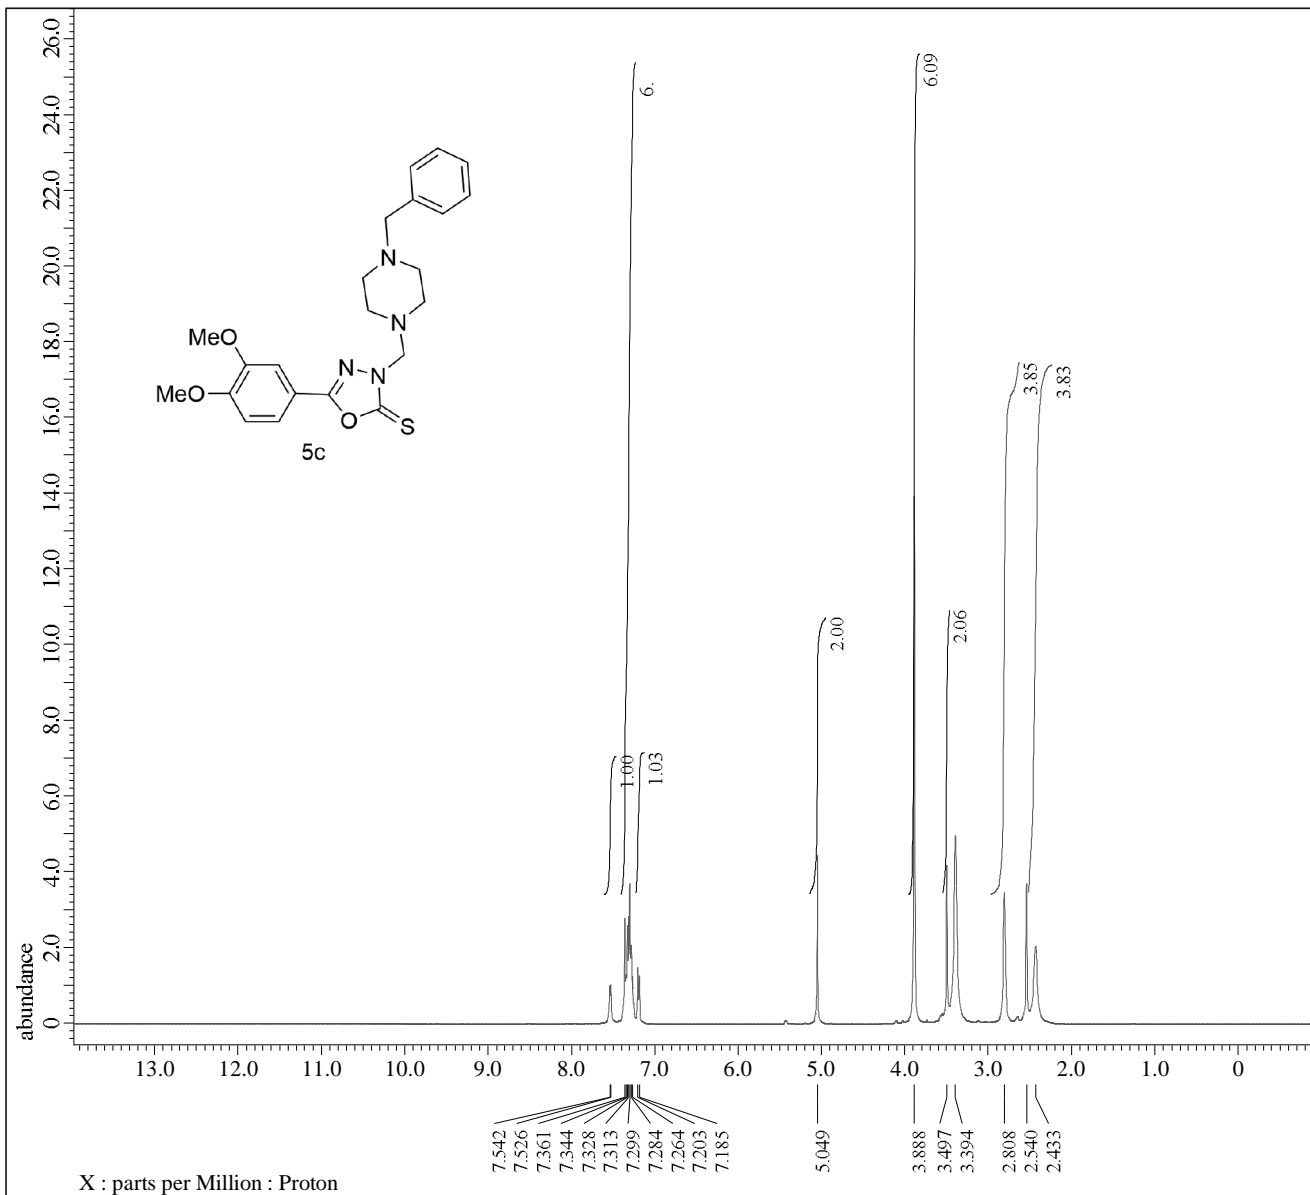

X : parts per Million : Proton



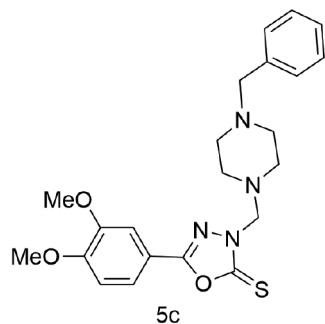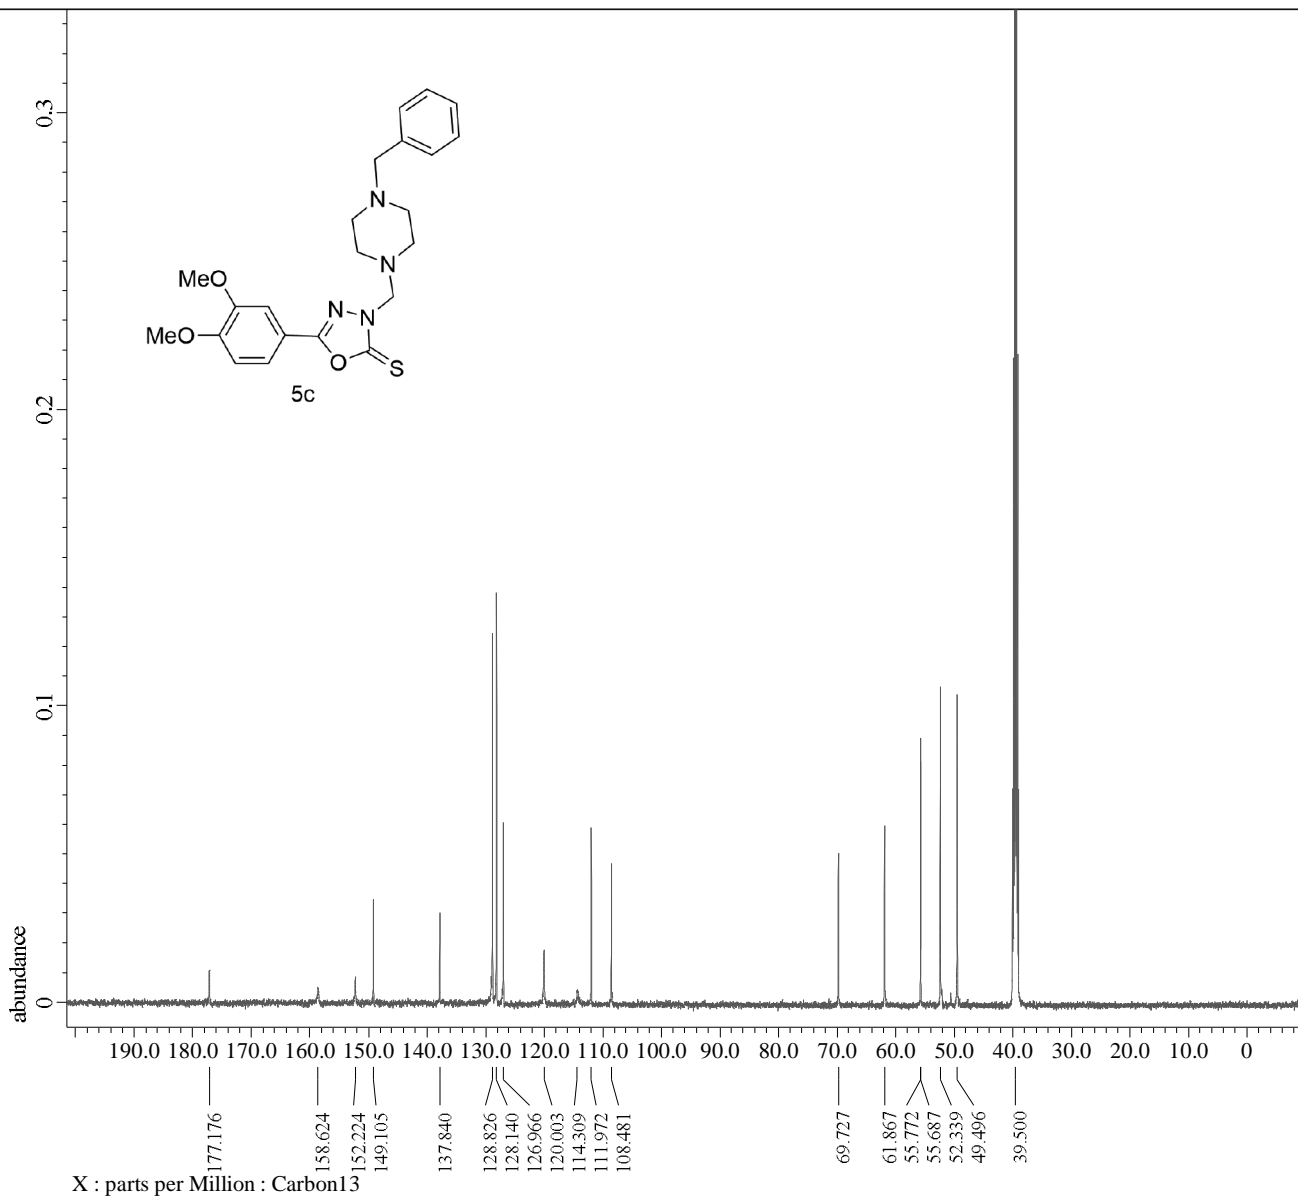

Filename = Prof.DR Ali Elemam\_DM\_3\_ca  
 Author = delta  
 Experiment = carbon.jxp  
 Sample\_Id = Prof.DR Ali Elemam\_DM\_3  
 Solvent = DMSO-D6  
 Creation\_Time = 21-DEC-2020 22:01:52  
 Revision\_Time = 5-FEB-2021 08:52:07  
 Current\_Time = 5-FEB-2021 08:53:24

Comment = single pulse decoupled gat  
 Data\_Format = 1D COMPLEX  
 Dim\_Size = 26214  
 Dim\_Title = Carbon13  
 Dim\_Units = [ppm]  
 Dimensions = X  
 Site = JNM-ECA500II  
 Spectrometer = DELTA2\_NMR

Field\_Strength = 11.7473579[T] (500[MHz])  
 X\_Acq\_Duration = 0.83361792[s]  
 X\_Domain = 13C  
 X\_Freq = 125.76529768[MHz]  
 X\_Offset = 100[ppm]  
 X\_Points = 32768  
 X\_Prescans = 4  
 X\_Resolution = 1.19959034[Hz]  
 X\_Sweep = 39.3081761[kHz]  
 X\_Sweep\_Clipped = 31.44654088[kHz]  
 Irr\_Domain = Proton  
 Irr\_Freq = 500.15991521[MHz]  
 Irr\_Offset = 5.0[ppm]  
 Clipped = FALSE  
 Scans = 1500  
 Total\_Scans = 1500

Relaxation\_Delay = 2[s]  
 Recvr\_Gain = 50  
 Temp\_Get = 20.1[dc]  
 X\_90\_Width = 32.3[us]  
 X\_Acq\_Time = 0.83361792[s]  
 X\_Angle = 30[deg]  
 X\_Atn = 10[db]  
 X\_Pulse = 10.76666667[us]  
 Irr\_Atn\_Dec = 17.693[db]  
 Irr\_Atn\_Noie = 17.693[db]  
 Irr\_Noise = WALTZ  
 Irr\_Pwidth = 92[us]  
 Decoupling = TRUE  
 Initial\_Wait = 1[s]  
 Noe = TRUE  
 Noe\_Time = 2[s]  
 Repetition\_Time = 2.83361792[s]



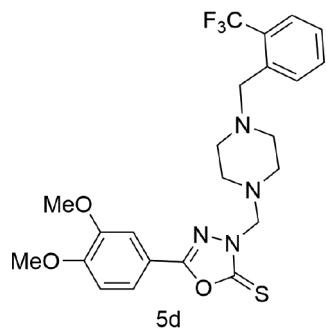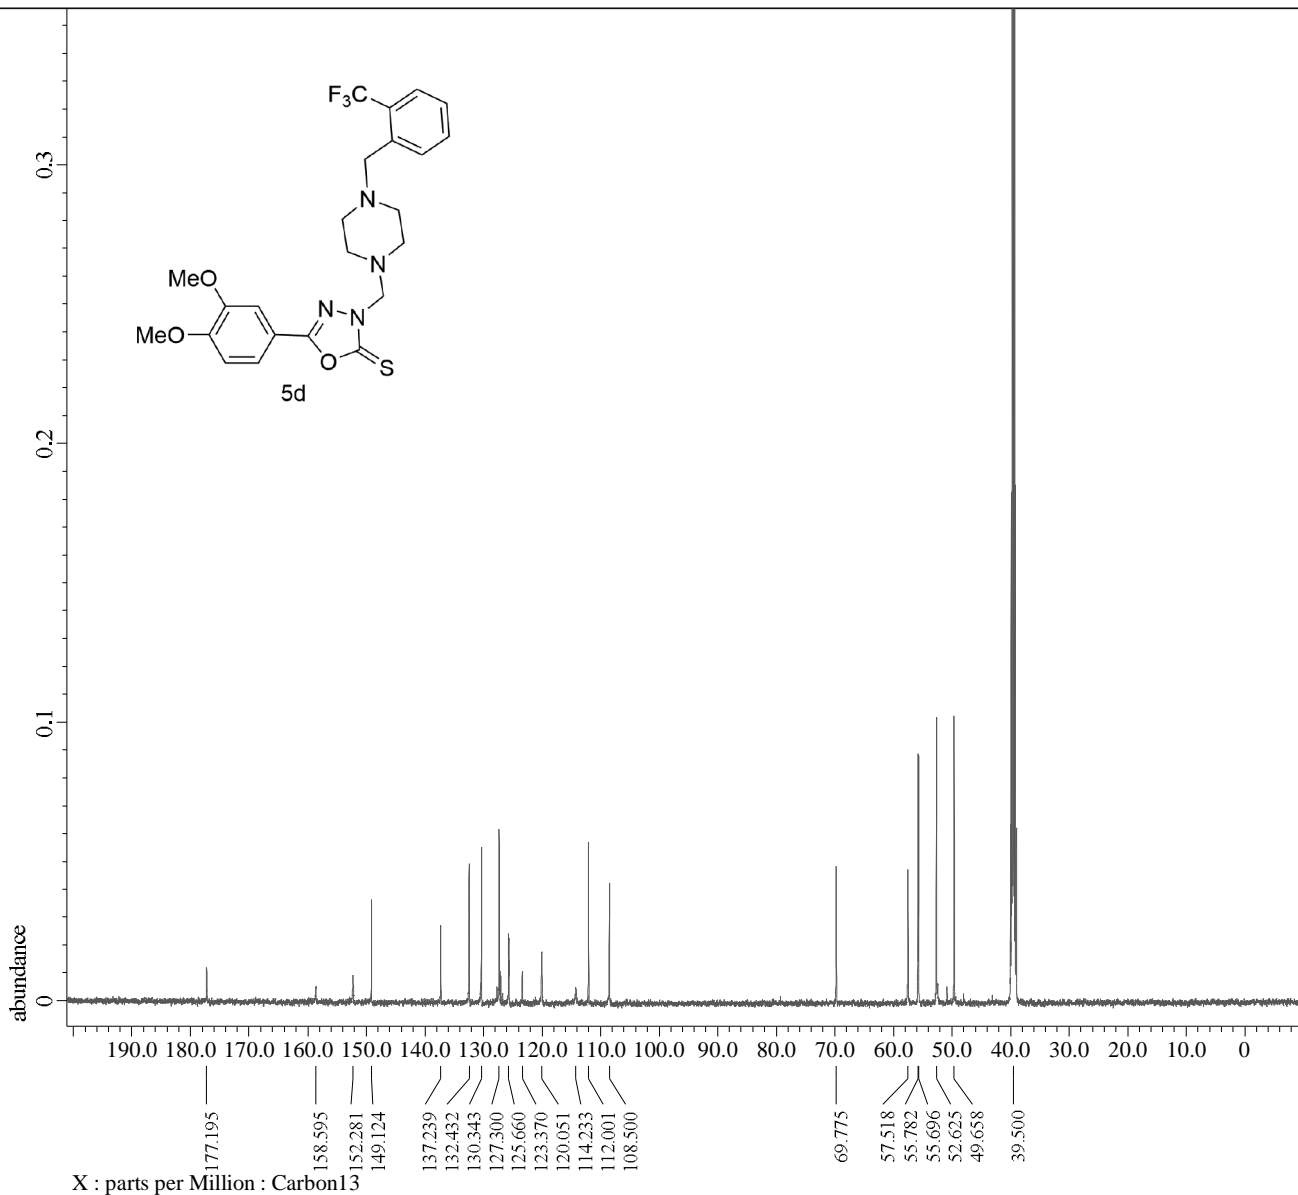

Filename = Prof.DR Ali Elemam\_DM\_4\_ca  
 Author = delta  
 Experiment = carbon.jxp  
 Sample\_Id = Prof.DR Ali Elemam\_DM\_4  
 Solvent = DMSO-D6  
 Creation\_Time = 22-DEC-2020 08:58:10  
 Revision\_Time = 5-FEB-2021 09:06:07  
 Current\_Time = 5-FEB-2021 09:07:41

Comment = single pulse decoupled gat  
 Data\_Format = 1D COMPLEX  
 Dim\_Size = 26214  
 Dim\_Title = Carbon13  
 Dim\_Units = [ppm]  
 Dimensions = X  
 Site = JNM-ECA500II  
 Spectrometer = DELTA2\_NMR

Field\_Strength = 11.7473579[T] (500[MHz])  
 X\_Acq\_Duration = 0.83361792[s]  
 X\_Domain = 13C  
 X\_Freq = 125.76529768[MHz]  
 X\_Offset = 100[ppm]  
 X\_Points = 32768  
 X\_Prescans = 4  
 X\_Resolution = 1.19959034[Hz]  
 X\_Sweep = 39.3081761[kHz]  
 X\_Sweep\_Clipped = 31.44654088[kHz]  
 Irr\_Domain = Proton  
 Irr\_Freq = 500.15991521[MHz]  
 Irr\_Offset = 5.0[ppm]  
 Clipped = FALSE  
 Scans = 1500  
 Total\_Scans = 1500

Relaxation\_Delay = 2[s]  
 Recvr\_Gain = 50  
 Temp\_Get = 18.9[dC]  
 X\_90\_Width = 32.3[us]  
 X\_Acq\_Time = 0.83361792[s]  
 X\_Angle = 30[deg]  
 X\_Atn = 10[dB]  
 X\_Pulse = 10.76666667[us]  
 Irr\_Atn\_Dec = 17.693[dB]  
 Irr\_Atn\_Noie = 17.693[dB]  
 Irr\_Noise = WALTZ  
 Irr\_Pwidth = 92[us]  
 Decoupling = TRUE  
 Initial\_Wait = 1[s]  
 Noe = TRUE  
 Noe\_Time = 2[s]  
 Repetition\_Time = 2.83361792[s]
